# Supplementary material for: Synthesis of 1,4-enynes via nickel-catalyzed cross-coupling of allylic alcohols with alkynylzinc reagents
Source: Royal Society of Chemistry journal article supplement (doi:10.1039/d1cc05221g), 2021-01-01

Electronic supplementary information

## Synthesis of 1,4-enynes via nickel-catalyzed cross-coupling of allylic alcohols with alkynylzinc reagents

Xue-Yi He<sup>a</sup> and Zhong-Xia Wang<sup>\*a,b</sup>

<sup>a</sup> CAS Key Laboratory of Soft Matter Chemistry and Department of Chemistry, University of Science and Technology of China, Hefei, Anhui 230026, P. R. China. Telephone 86 551 63603043, E-mail: zxwang@ustc.edu.cn.

<sup>b</sup> Collaborative Innovation Center of Chemical Science and Engineering, Tianjin 300072, P. R. China.

### Contents

|                                                    |     |
|----------------------------------------------------|-----|
| 1. General Information                             | S2  |
| 2. Preparation of alkynylzinc reagents             | S2  |
| 3. Optimization of reaction conditions             | S2  |
| 4. General procedure for the catalytic coupling    | S4  |
| 5. Characterization data                           | S4  |
| 6. Gram scale reaction                             | S16 |
| 7. Transformation of 1,4-enynes                    | S17 |
| 8. Mechanistic studies                             | S18 |
| 9. References                                      | S20 |
| 10. Copies of NMR spectra of the reaction products | S22 |

## 1. General information

All reactions were performed under nitrogen atmosphere using standard Schlenk and vacuum line techniques. All chemicals were purchased as reagent grade and used without further purification unless otherwise noted. Toluene and THF were purified by JC Meyer Phoenix Solvent Systems. DME, *n*Bu<sub>2</sub>O, and 1,4-dioxane were distilled under nitrogen over sodium and degassed prior to use. DMF, DMA, and NMP was dried over 4 Å molecular sieves, fractionally distilled under reduced pressure, and stored under a nitrogen atmosphere. ZnCl<sub>2</sub> and LiCl were purchased from commercial vendors and dried under vacuum at 140 °C for 12 h prior to use. MeMgCl was purchased from commercial vendors and used as received. MeZnCl was prepared via reaction of ZnCl<sub>2</sub> with 1.0 equiv of MeMgCl in the presence of 2.0 equiv of LiCl. Concentration of MeZnCl was titrated using Knochel's method.<sup>1</sup> Allyl alcohols were prepared according to literature methods.<sup>2</sup> NMR spectra were recorded on a Bruker av400 or Bruker av500 spectrometer at 25 °C. The chemical shifts of the <sup>1</sup>H NMR spectra were referenced to TMS, and the chemical shifts of the <sup>13</sup>C NMR spectra were referenced to internal solvent resonance. The chemical shifts of the <sup>19</sup>F NMR spectra were referenced to external CF<sub>3</sub>COOH. High-resolution mass spectra (HRMS) were acquired on a Thermo Fisher LTQ Orbitrap XL mass spectrometer.

## 2. Preparation of alkynylzinc reagents

To a stirred solution of terminal alkyne (5 mmol) in THF (5 mL) was added dropwise *n*BuLi (2.5 M solution in hexane, 2.1 mL, 5.25 mmol) at -78 °C. After the mixture was stirred for 1 h at -78 °C, dried ZnCl<sub>2</sub> (715.5 mg, 5.25 mmol) in THF (5 mL) was added. The cooling bath was removed after 15 min, and the resulting mixture was slowly warmed to room temperature with stirring. The concentration of the resulting alkynylzinc solution was titrated using Knochel's method.<sup>1</sup>

## 3. Optimization of reaction conditions

Table S1. Optimization of reaction conditions employing (*E*)-3-phenylprop-2-en-1-ol and PhC≡CZnCl as the model substrates<sup>a</sup>

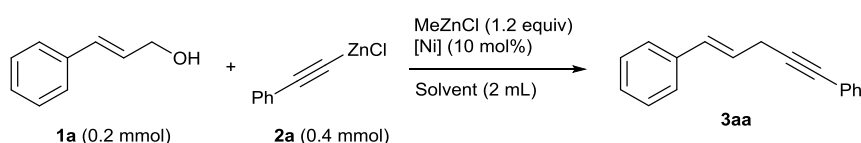

| Entry           | [Ni]                                               | Solvent                                   | Temp. (°C) | Time (h) | Yield (%) <sup>b</sup> |
|-----------------|----------------------------------------------------|-------------------------------------------|------------|----------|------------------------|
| 1               | NiCl <sub>2</sub> (PMe <sub>3</sub> ) <sub>2</sub> | toluene                                   | 120        | 16       | –                      |
| 2 <sup>c</sup>  | Ni(OTf) <sub>2</sub>                               | toluene                                   | 120        | 16       | 25                     |
| 3 <sup>c</sup>  | NiBr <sub>2</sub>                                  | toluene                                   | 120        | 16       | 54                     |
| 4               | NiBr <sub>2</sub> (glyme)                          | toluene                                   | 120        | 16       | –                      |
| 5               | NiCl <sub>2</sub> (PCy <sub>3</sub> ) <sub>2</sub> | toluene                                   | 120        | 16       | –                      |
| 6               | NiCl <sub>2</sub> (PPh <sub>3</sub> ) <sub>2</sub> | toluene                                   | 120        | 16       | –                      |
| 7               | NiCl <sub>2</sub> (dppe)                           | toluene                                   | 120        | 16       | 63                     |
| 8               | NiCl <sub>2</sub> (dppf)                           | toluene                                   | 120        | 16       | 48                     |
| 9               | NiCl <sub>2</sub> (dppe)                           | toluene                                   | 120        | 24       | 74                     |
| 10              | NiCl <sub>2</sub> (dppe)                           | toluene                                   | 120        | 34       | 76                     |
| 11              | NiCl <sub>2</sub> (dppe)                           | toluene                                   | 110        | 24       | 88 <sup>d</sup>        |
| 12              | NiCl <sub>2</sub> (dppe)                           | toluene                                   | 100        | 24       | 82                     |
| 13              | NiCl <sub>2</sub> (dppe)                           | <i>n</i> Bu <sub>2</sub> O                | 110        | 24       | 66                     |
| 14              | NiCl <sub>2</sub> (dppe)                           | toluene/ <i>n</i> Bu <sub>2</sub> O (3/1) | 110        | 24       | 82                     |
| 15              | NiCl <sub>2</sub> (dppe)                           | dioxane                                   | 110        | 24       | 36                     |
| 16              | NiCl <sub>2</sub> (dppe)                           | DME                                       | 110        | 24       | <5                     |
| 17              | NiCl <sub>2</sub> (dppe)                           | NMP                                       | 110        | 24       | –                      |
| 18 <sup>e</sup> | NiCl <sub>2</sub> (dppe)                           | toluene                                   | 110        | 24       | 70                     |

<sup>a</sup> Unless otherwise specified, the reactions were carried out according to the conditions indicated by the above equation. <sup>b</sup> NMR yield, determined by <sup>1</sup>H NMR spectra using C<sub>2</sub>H<sub>2</sub>Cl<sub>4</sub> as an internal standard. <sup>c</sup> 10 mol% of dppe was employed. <sup>d</sup> Isolated yields. <sup>e</sup> 5 mol% of NiCl<sub>2</sub>(dppe) was used.

Table S2. Optimization of reaction conditions employing (*E*)-3-phenylprop-2-en-1-ol and Me<sub>3</sub>SiC≡CZnCl as the model substrates<sup>a</sup>

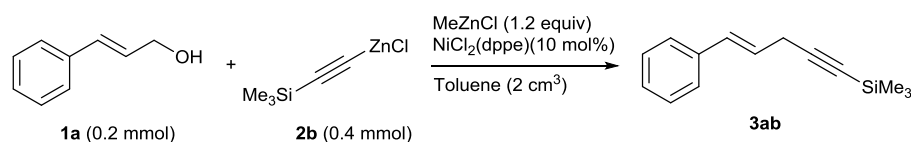

| Entry          | Temp. (°C) | Time (h) | Yield (%) <sup>b</sup> |
|----------------|------------|----------|------------------------|
| 1              | 110        | 24       | 99                     |
| 2 <sup>c</sup> | 110        | 16       | 90 <sup>d</sup>        |
| 3 <sup>e</sup> | 110        | 24       | 53 <sup>d</sup>        |
| 4 <sup>f</sup> | 110        | 24       | 99                     |
| 5 <sup>f</sup> | 100        | 24       | 99                     |
| 6 <sup>f</sup> | 90         | 24       | 96                     |
| 7 <sup>f</sup> | 100        | 18       | 97                     |

<sup>a</sup> Unless otherwise specified, the reactions were carried out according to the conditions indicated by the above equation. <sup>b</sup> Isolated yields. <sup>c</sup> 5 mol% of NiCl<sub>2</sub>(dppe) was used. <sup>d</sup> NMR yield, determined by <sup>1</sup>H NMR spectra using C<sub>2</sub>H<sub>2</sub>Cl<sub>4</sub> as an internal standard. <sup>e</sup> No MeZnCl was used. <sup>f</sup> 0.3 mmol of alkynylzinc reagent was employed.

#### 4. General procedure for the catalytic coupling

(1) **ArC≡CZnCl was used as the nucleophile:** NiCl<sub>2</sub>(dppe) (10.6 mg, 10 mol%) and allyl alcohol (0.5 mL, 0.4 M solution in THF, 0.2 mmol) were charged to a Schlenk tube under nitrogen. To the stirred mixture was added MeZnCl (0.42 mL, 0.57 M solution in THF, 0.24 mmol) at room temperature. After the mixture was stirred for 5 min, a solution of ArC≡CZnCl (1 mL, 0.4 M solution in THF, 0.4 mmol) was added. The mixture was stirred for an additional 5 min. Solvent was removed in vacuo and then toluene (2 mL) was added. The resulting mixture was heated at 110 °C (oil bath temperature) for 24 h and then cooled to room temperature. A 20% aqueous solution of NH<sub>4</sub>Cl (10 mL) was added. The mixture was extracted with ethyl acetate (3 × 10 mL). The combined organic phases were dried over anhydrous Na<sub>2</sub>SO<sub>4</sub>, concentrated by rotary evaporation, and purified by column chromatography (silica gel).

(2) **Me<sub>3</sub>SiC≡CZnCl was used as the nucleophile:** NiCl<sub>2</sub>(dppe) (10.6 mg, 10 mol%) and allyl alcohol (0.5 mL, 0.4 M in THF, 0.2 mmol) were charged to a Schlenk tube under nitrogen. To the stirred mixture was added MeZnCl (0.42 mL, 0.57 M solution in THF, 0.24 mmol) at room temperature. After the mixture was stirred for 5 min, a solution of Me<sub>3</sub>SiC≡CZnCl (0.65 mL, 0.46 M solution in THF, 0.3 mmol) was added. The resulting solution was stirred for an additional 5 min. Solvent was removed in vacuo and then toluene (2 mL) was added. The reaction mixture was heated at 100 °C (oil bath temperature) for 24 h and then cooled to room temperature. A 20% aqueous solution of NH<sub>4</sub>Cl (10 mL) was added. The resulting mixture was extracted with ethyl acetate (3 × 10 mL). The combined organic phases were dried over anhydrous Na<sub>2</sub>SO<sub>4</sub>, concentrated by rotary evaporation, and purified by column chromatography (silica gel).

#### 5. Characterization data

(*E*)-pent-1-en-4-yne-1,5-diylidibenzene (**3aa**)<sup>3</sup>

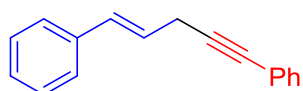

Eluent: EtOAc/petroleum ether 1/200 (v/v), light yellow oil, yield 38.4 mg (88%). <sup>1</sup>H NMR (400 MHz, CDCl<sub>3</sub>): δ 7.49–7.42 (m, 2H), 7.41–7.36 (m, 2H), 7.34–7.27 (m, 5H), 7.25–7.19 (m, 1H), 6.71 (dt, *J* = 15.7, 1.6 Hz, 1H), 6.25 (dt, *J* = 15.7, 5.7 Hz, 1H), 3.36 (dd, *J* = 5.6, 1.8

Hz, 2H).  $^{13}\text{C}$  NMR (101 MHz,  $\text{CDCl}_3$ ):  $\delta$  137.22, 131.77, 131.55, 128.67, 128.39, 127.97, 127.48, 126.41, 124.38, 123.77, 86.87, 83.00, 23.15.

(*E*)-trimethyl(5-phenylpent-4-en-1-yn-1-yl)silane (**3ab**)<sup>4</sup>

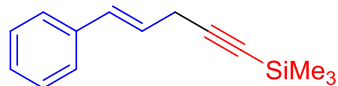

Eluent: EtOAc/petroleum ether 1/200 (v/v), light yellow oil, yield 42.7 mg (99%).  $^1\text{H}$  NMR (400 MHz,  $\text{CDCl}_3$ ):  $\delta$  7.41–7.35 (m, 2H), 7.35–7.29 (m, 2H), 7.28–7.20 (m, 1H), 6.65 (dt,  $J = 15.7, 1.9$  Hz, 1H), 6.17 (dt,  $J = 15.7, 5.7$  Hz, 1H), 3.19 (dd,  $J = 5.7, 1.9$  Hz, 2H), 0.21 (s, 9H).  $^{13}\text{C}$  NMR (101 MHz,  $\text{CDCl}_3$ ):  $\delta$  137.22, 131.58, 128.65, 127.47, 126.40, 124.12, 103.76, 87.23, 23.60, 0.25.

(*E*)-1-methoxy-4-(5-phenylpent-1-en-4-yn-1-yl)benzene (**3ba**)<sup>4</sup>

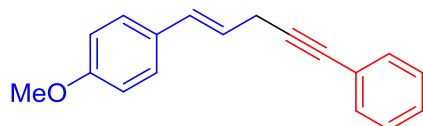

Eluent: EtOAc/petroleum ether 1/60 (v/v), light yellow oil, yield 43.2 mg (87%).  $^1\text{H}$  NMR (400 MHz,  $\text{CDCl}_3$ ):  $\delta$  7.48–7.41 (m, 2H), 7.35–7.26 (m, 5H), 6.85 (d,  $J = 8.8$  Hz, 2H), 6.64 (dt,  $J = 15.6, 1.9$  Hz, 1H), 6.11 (dt,  $J = 15.7, 5.7$  Hz, 1H), 3.80 (s, 3H), 3.34 (dd,  $J = 5.7, 1.8$  Hz, 2H).  $^{13}\text{C}$  NMR (101 MHz,  $\text{CDCl}_3$ ):  $\delta$  159.14, 131.76, 130.92, 130.04, 128.37, 127.92, 127.54, 123.83, 122.15, 114.07, 87.17, 82.82, 55.41, 23.10.

(*E*)-(5-(4-methoxyphenyl)pent-4-en-1-yn-1-yl)trimethylsilane (**3bb**)<sup>4</sup>

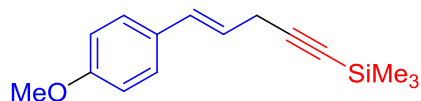

Eluent: EtOAc/petroleum ether 1/60 (v/v), light yellow oil, yield 48.5 mg (99%).  $^1\text{H}$  NMR (400 MHz,  $\text{CDCl}_3$ ):  $\delta$  7.29 (d,  $J = 8.7$  Hz, 2H), 6.84 (d,  $J = 8.7$  Hz, 2H), 6.56 (dt,  $J = 15.8, 1.8$  Hz, 1H), 6.01 (dt,  $J = 15.7, 5.7$  Hz, 1H), 3.80 (s, 3H), 3.15 (dd,  $J = 5.7, 1.8$  Hz, 2H), 0.19 (s, 9H).  $^{13}\text{C}$  NMR (101 MHz,  $\text{CDCl}_3$ ):  $\delta$  159.12, 130.92, 130.01, 127.51, 121.88, 114.04, 104.07, 86.97, 55.39, 23.55, 0.26.

(*E*)-methyl(4-(5-phenylpent-1-en-4-yn-1-yl)phenyl)sulfane (**3ca**)

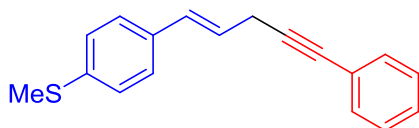

Eluent: EtOAc/petroleum ether 1/150 (v/v), light yellow oil, yield 41.2 mg (78%).  $^1\text{H}$  NMR (400 MHz,  $\text{CDCl}_3$ ):  $\delta$  7.47–7.43 (m, 2H), 7.33–7.27 (m, 5H), 7.20 (d,  $J = 8.4$  Hz, 2H), 6.66 (dt,  $J = 15.7, 1.8$  Hz, 1H), 6.20 (dt,  $J = 15.7, 5.7$  Hz, 1H), 3.36 (dd,  $J = 5.7, 1.8$  Hz, 2H), 2.47 (s, 3H).  $^{13}\text{C}$  NMR (101 MHz,  $\text{CDCl}_3$ ):  $\delta$  137.50, 134.22, 131.76, 130.90, 128.39, 127.97, 126.82, 123.83, 123.74, 86.84, 83.02, 23.13, 16.02. HRMS (ESI):  $m/z$  265.1056  $[\text{M}+\text{H}]^+$ , calcd. for  $\text{C}_{18}\text{H}_{17}\text{S}$  265.1051.

(*E*)-trimethyl(5-(4-(methylthio)phenyl)pent-4-en-1-yn-1-yl)silane (**3cb**)

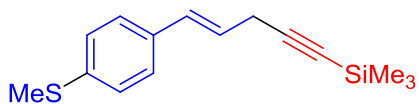

Eluent: EtOAc/petroleum ether 1/120 (v/v), yellow oil, yield 51.6 mg (99%).  $^1\text{H}$  NMR (500 MHz,  $\text{CDCl}_3$ ):  $\delta$  7.27 (d,  $J = 6.7$  Hz, 2H), 7.19 (d,  $J = 6.7$  Hz, 2H), 6.57 (dt,  $J = 15.7, 1.9$  Hz, 1H), 6.11 (dt,  $J = 15.7, 5.7$  Hz, 1H), 3.16 (dd,  $J = 5.7, 1.8$  Hz, 2H), 2.47 (s, 3H), 0.19 (s, 9H).  $^{13}\text{C}$  NMR (126 MHz,  $\text{CDCl}_3$ ):  $\delta$  137.49, 134.21, 130.91, 126.82, 126.80, 123.57, 103.71, 87.23, 23.57, 16.02, 0.24. HRMS (ESI):  $m/z$  283.0947  $[\text{M}+\text{Na}]^+$ , calcd. for  $\text{C}_{15}\text{H}_{20}\text{NaSSi}$  283.0953.

(*E*)-1-methoxy-3-(5-phenylpent-1-en-4-yn-1-yl)benzene (**3d**)

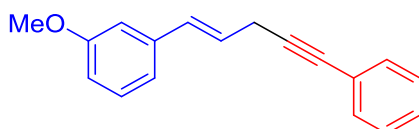

Eluent: EtOAc/petroleum ether 1/60 (v/v), light yellow oil, yield 42.3 mg (85%).  $^1\text{H}$  NMR (400 MHz,  $\text{CDCl}_3$ ):  $\delta$  7.48–7.41 (m, 2H), 7.35–7.26 (m, 5H), 6.85 (dt,  $J = 8.8$  Hz, 2H), 6.64 (dt,  $J = 15.7, 1.8$  Hz, 1H), 6.10 (dt,  $J = 15.7, 5.7$  Hz, 1H), 3.80 (s, 3H), 3.34 (dd,  $J = 5.7, 1.8$  Hz, 2H).  $^{13}\text{C}$  NMR (101 MHz,  $\text{CDCl}_3$ ):  $\delta$  159.16, 131.77, 130.94, 130.06, 128.38, 127.92, 127.55, 123.85, 122.16, 114.09, 87.18, 82.83, 55.42, 23.10. HRMS (ESI):  $m/z$  249.1296  $[\text{M}+\text{H}]^+$ , calcd. for  $\text{C}_{18}\text{H}_{17}\text{O}$  249.1279.

(*E*)-1-phenoxy-3-(5-phenylpent-1-en-4-yn-1-yl)benzene (**3ea**)

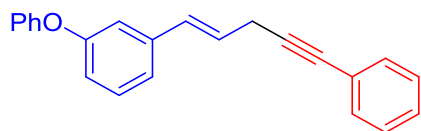

Eluent: EtOAc/petroleum ether 1/60 (v/v), light yellow oil, yield 51.4 mg (83%).  $^1\text{H}$  NMR (400 MHz,  $\text{CDCl}_3$ ):  $\delta$  7.48–7.40 (m, 2H), 7.37–7.23 (m, 6H), 7.16–7.07 (m, 2H), 7.05 (t,  $J = 1.9$  Hz, 1H), 7.03–6.98 (m, 2H), 6.91–6.85 (m, 1H), 6.67 (dt,  $J = 15.7, 1.9$  Hz, 1H), 6.22 (dt,  $J = 15.7, 5.6$  Hz, 1H), 3.34 (dd,  $J = 5.6, 1.9$  Hz, 2H).  $^{13}\text{C}$  NMR (101 MHz,  $\text{CDCl}_3$ ):  $\delta$  157.57, 157.40, 139.17, 131.78, 131.01, 129.95, 129.89, 128.39, 128.00, 125.27, 123.70, 123.33, 121.60, 118.94, 118.07, 116.76, 86.62, 83.12, 23.10. HRMS (ESI):  $m/z$  311.1455  $[\text{M}+\text{H}]^+$ , calcd. for  $\text{C}_{23}\text{H}_{19}\text{O}$  311.1436.

(*E*)-trimethyl(5-(3-phenoxyphenyl)pent-4-en-1-yn-1-yl)silane (**3eb**)

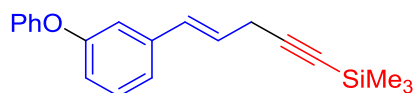

Eluent: EtOAc/petroleum ether 1/60 (v/v), light yellow oil, yield 55.6 mg (91%).  $^1\text{H}$  NMR (400 MHz,  $\text{CDCl}_3$ ):  $\delta$  7.38–7.29 (m, 2H), 7.25 (d,  $J = 7.7$  Hz, 1H), 7.13–7.06 (m, 2H), 7.05–6.97 (m, 3H), 6.90–6.83 (m, 1H), 6.59 (dt,  $J = 15.8, 1.9$  Hz, 1H), 6.12 (dt,  $J = 15.7, 5.6$  Hz, 1H), 3.15 (dd,  $J = 5.6, 1.9$  Hz, 2H), 0.18 (s, 9H).  $^{13}\text{C}$  NMR (101 MHz,  $\text{CDCl}_3$ ):  $\delta$  157.52, 157.39, 139.16, 131.02, 129.92, 129.87, 125.01, 123.32, 121.60, 118.90, 118.02, 116.77, 103.49, 87.38, 23.55, 0.24. HRMS (ESI):  $m/z$  329.1358  $[\text{M}+\text{Na}]^+$ , calcd. for  $\text{C}_{20}\text{H}_{22}\text{NaOSi}$  329.1338.

(*E*)-1-fluoro-4-(5-phenylpent-1-en-4-yn-1-yl)benzene (**3fa**)<sup>5</sup>

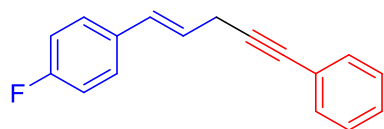

Eluent: EtOAc/petroleum ether 1/200 (v/v), colorless oil, yield 36.8 mg (78%).  $^1\text{H}$  NMR (500 MHz,  $\text{CDCl}_3$ ):  $\delta$  7.48–7.42 (m, 2H), 7.37–7.27 (m, 5H), 6.99 (t,  $J = 8.8$  Hz, 2H), 6.67 (dt,  $J = 15.7, 1.9$  Hz, 1H), 6.16 (dt,  $J = 15.7, 5.6$  Hz, 1H), 3.34 (dd,  $J = 5.6, 1.9$  Hz, 2H).  $^{13}\text{C}$  NMR (126 MHz,  $\text{CDCl}_3$ ):  $\delta$  162.32 (d,  $J = 246.3$  Hz), 133.39 (d,  $J = 3.6$  Hz), 131.77, 130.41, 128.40, 128.01, 127.88 (d,  $J = 8.2$  Hz), 124.14 (d,  $J = 2.2$  Hz), 123.73, 115.50 (d,  $J = 22.0$  Hz), 86.73, 83.08, 23.08.  $^{19}\text{F}$  NMR (471 MHz,  $\text{CDCl}_3$ ):  $\delta$  -114.91.

(*E*)-(5-(4-fluorophenyl)pent-4-en-1-yn-1-yl)trimethylsilane (**3fb**)

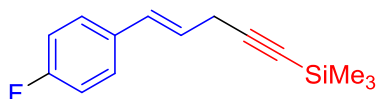

Eluent: EtOAc/petroleum ether 1/120 (v/v), colorless oil, yield 46.1 mg (99%).  $^1\text{H}$  NMR (400 MHz,  $\text{CDCl}_3$ ):  $\delta$  7.37–7.28 (m, 2H), 6.99 (t,  $J = 8.7$  Hz, 1H, 2H), 6.59 (dt,  $J = 15.8, 1.8$  Hz, 1H), 6.07 (dt,  $J = 15.7, 5.6$  Hz, 1H), 3.16 (dd,  $J = 5.7, 1.9$  Hz, 2H), 0.19 (s, 9H).  $^{13}\text{C}$  NMR (101 MHz,  $\text{CDCl}_3$ ):  $\delta$  162.29 (d,  $J = 246.4$  Hz), 133.35 (d,  $J = 3.4$  Hz), 130.41, 127.86 (d,  $J = 8.0$  Hz), 123.85 (d,  $J = 2.3$  Hz), 115.53 (d,  $J = 21.6$  Hz), 103.59, 87.34, 23.53, 0.24.  $^{19}\text{F}$  NMR (471 MHz,  $\text{CDCl}_3$ ):  $\delta$  -114.92. HRMS (ESI):  $m/z$  233.1151  $[\text{M}+\text{H}]^+$ , calcd. for  $\text{C}_{14}\text{H}_{18}\text{FSi}$  233.1162.

(*E*)-1-chloro-4-(5-phenylpent-1-en-4-yn-1-yl)benzene (**3ga**)<sup>4</sup>

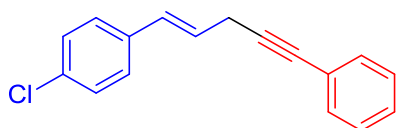

Eluent: EtOAc/petroleum ether 1/200 (v/v), light yellow oil, yield 26.7 mg (53%).  $^1\text{H}$  NMR (400 MHz,  $\text{CDCl}_3$ ):  $\delta$  7.49–7.41 (m, 2H), 7.34–7.27 (m, 6H), 6.66 (dt,  $J = 15.7, 1.9$  Hz, 1H), 6.22 (dt,  $J = 15.7, 5.6$  Hz, 1H), 3.35 (dd,  $J = 5.6, 1.9$  Hz, 2H).  $^{13}\text{C}$  NMR (101 MHz,  $\text{CDCl}_3$ ):  $\delta$  135.72, 133.07, 131.76, 130.38, 128.81, 128.41, 128.04, 127.62, 125.10, 123.66, 86.53, 83.20, 23.11.

(*E*)-(5-(4-chlorophenyl)pent-4-en-1-yn-1-yl)trimethylsilane (**3gb**)

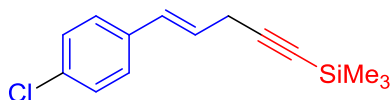

Eluent: EtOAc/petroleum ether 1/120 (v/v), light yellow oil, yield 46.7 mg (94%).  $^1\text{H}$  NMR (400 MHz,  $\text{CDCl}_3$ ):  $\delta$  7.27 (s, 4H), 6.58 (dt,  $J = 15.7, 1.8$  Hz, 1H), 6.13 (dt,  $J = 15.7, 5.6$  Hz, 1H), 3.17 (dd,  $J = 5.6, 1.8$  Hz, 2H), 0.19 (s, 9H).  $^{13}\text{C}$  NMR (101 MHz,  $\text{CDCl}_3$ ):  $\delta$  135.69, 133.05, 130.39, 128.79, 127.61, 124.83, 103.37, 87.49, 23.57, 0.24. HRMS (ESI):  $m/z$  249.0884  $[\text{M}+\text{H}]^+$ , calcd. for  $\text{C}_{14}\text{H}_{18}\text{ClSi}$  249.0866.

(*E*)-1-(5-phenylpent-1-en-4-yn-1-yl)-4-(trifluoromethyl)benzene (**3ha**)

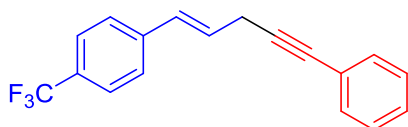



Eluent: EtOAc/petroleum ether 1/200 (v/v), colorless oil, yield 48.1 mg (84%).  $^1\text{H}$  NMR (400 MHz,  $\text{CDCl}_3$ ):  $\delta$  7.56 (d,  $J = 8.2$  Hz, 2H), 7.51–7.41 (m, 4H), 7.36–7.27 (m, 3H), 6.75 (d,  $J = 15.8$  Hz, 1H), 6.35 (dt,  $J = 15.7, 5.5$  Hz, 1H), 3.39 (dd,  $J = 5.6, 1.8$  Hz, 2H).  $^{13}\text{C}$  NMR (101 MHz,  $\text{CDCl}_3$ ):  $\delta$  140.70, 131.79, 130.37, 129.32 (q,  $J = 32.5$  Hz), 128.44, 128.12, 127.22, 126.58, 125.65 (q,  $J = 3.8$  Hz), 124.37 (q,  $J = 271.4$  Hz), 123.60, 86.18, 83.44, 23.19.  $^{19}\text{F}$  NMR (376 MHz,  $\text{CDCl}_3$ ):  $\delta$  -62.44. HRMS (ESI):  $m/z$  287.1060  $[\text{M}+\text{H}]^+$ , calcd. for  $\text{C}_{18}\text{H}_{14}\text{F}_3$  287.1048.

(*E*)-trimethyl(5-(4-(trifluoromethyl)phenyl)pent-4-en-1-yn-1-yl)silane (**3hb**)

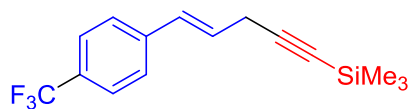

Eluent: EtOAc/petroleum ether 1/120 (v/v), yellow oil, yield 51.7 mg (92%).  $^1\text{H}$  NMR (400 MHz,  $\text{CDCl}_3$ ):  $\delta$  7.55 (d,  $J = 8.2$  Hz, 2H), 7.45 (d,  $J = 8.2$  Hz, 2H), 6.68 (d,  $J = 15.8$  Hz, 1H), 6.26 (dt,  $J = 15.7, 5.6$  Hz, 1H), 3.21 (dd,  $J = 5.6, 1.9$  Hz, 2H), 0.20 (s, 9H).  $^{13}\text{C}$  NMR (101 MHz,  $\text{CDCl}_3$ ):  $\delta$  140.66, 130.37, 129.29 (q,  $J = 32.4$  Hz), 126.94, 126.56, 125.62 (q,  $J = 3.8$  Hz), 124.36 (q,  $J = 271.8$  Hz), 103.00, 87.81, 23.64, 0.22.  $^{19}\text{F}$  NMR (471 MHz,  $\text{CDCl}_3$ ):  $\delta$  -62.43. HRMS (ESI):  $m/z$  305.0945  $[\text{M}+\text{Na}]^+$ , calcd. for  $\text{C}_{15}\text{H}_{17}\text{F}_3\text{NaSi}$  305.0949.

ethyl (*E*)-4-(5-(trimethylsilyl)pent-1-en-4-yn-1-yl)benzoate (**3i**)

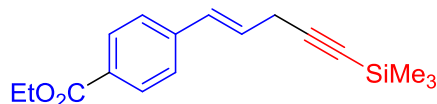

Eluent: EtOAc/petroleum ether 1/10 (v/v), light yellow oil, yield 40.3 mg (70%).  $^1\text{H}$  NMR (500 MHz,  $\text{CDCl}_3$ ):  $\delta$  7.98 (d,  $J = 8.4$  Hz, 2H), 7.41 (d,  $J = 8.4$  Hz, 2H), 6.68 (d,  $J = 15.7$  Hz, 1H), 6.29 (dt,  $J = 15.7, 5.6$  Hz, 1H), 4.36 (q,  $J = 7.1$  Hz, 2H), 3.21 (dd,  $J = 5.6, 1.9$  Hz, 2H), 1.39 (t,  $J = 7.1$  Hz, 3H), 0.20 (s, 9H).  $^{13}\text{C}$  NMR (126 MHz,  $\text{CDCl}_3$ ):  $\delta$  166.57, 141.55, 130.80, 129.99, 129.26, 126.84, 126.23, 103.07, 87.71, 61.03, 23.68, 14.48, 0.22. HRMS (ESI):  $m/z$  309.1300  $[\text{M}+\text{Na}]^+$ , calcd. for  $\text{C}_{17}\text{H}_{22}\text{NaO}_2\text{Si}$  309.1287.

(*E*)-*N,N*-diethyl-4-(5-(trimethylsilyl)pent-1-en-4-yn-1-yl)benzamide (**3j**)

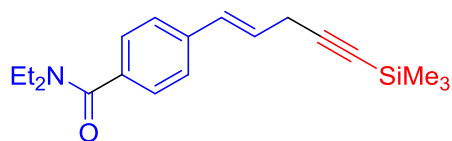

Eluent: EtOAc/petroleum ether 1/3 (v/v), light yellow oil, yield 40.3 mg (64%). <sup>1</sup>H NMR (500 MHz, CDCl<sub>3</sub>): δ 7.38 (d, *J* = 8.1 Hz, 2H), 7.32 (d, *J* = 8.0 Hz, 2H), 6.64 (d, *J* = 15.8 Hz, 1H), 6.21 (dt, *J* = 15.8, 5.6 Hz, 1H), 3.54 (b, 2H), 3.26 (b, 2H), 3.19 (dd, *J* = 5.7, 1.9 Hz, 2H), 1.24 (b, 3H), 1.11 (b, 3H), 0.20 (s, 9H). <sup>13</sup>C NMR (126 MHz, CDCl<sub>3</sub>): δ 171.20, 138.02, 136.13, 130.85, 126.79, 126.30, 125.26, 103.36, 87.44, 43.38, 39.37, 23.58, 14.35, 13.02, 0.21. HRMS (ESI): *m/z* 314.1937 [M+H]<sup>+</sup>, calcd. for C<sub>19</sub>H<sub>28</sub>NOSi 314.1940.

(*E*)-trimethyl(5-(4-((trimethylsilyl)ethynyl)phenyl)pent-4-en-1-yn-1-yl)silane (**3k**)

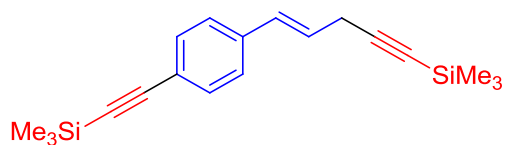

Eluent: EtOAc/petroleum ether 1/120 (v/v), light yellow oil, yield 45.9 mg (74%). <sup>1</sup>H NMR (500 MHz, CDCl<sub>3</sub>): δ 7.40 (d, *J* = 8.3 Hz, 2H), 7.28 (d, *J* = 8.3 Hz, 2H), 6.60 (d, *J* = 15.7 Hz, 1H), 6.17 (dt, *J* = 15.7, 5.6 Hz, 1H), 3.18 (dd, *J* = 5.7, 1.8 Hz, 2H), 0.25 (s, 9H), 0.19 (s, 9H). <sup>13</sup>C NMR (126 MHz, CDCl<sub>3</sub>): δ 137.31, 132.29, 130.97, 126.19, 125.23, 121.96, 105.27, 103.36, 94.79, 87.48, 23.63, 0.24, 0.13. HRMS (ESI): *m/z* 311.1664 [M+H]<sup>+</sup>, calcd. for C<sub>19</sub>H<sub>27</sub>Si<sub>2</sub> 311.1651.

(*E*)-trimethyl(5-(2-((trimethylsilyl)ethynyl)phenyl)pent-4-en-1-yn-1-yl)silane (**3l**)

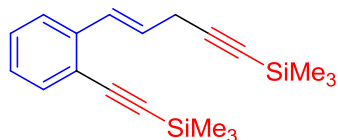

Eluent: EtOAc/petroleum ether 1/200 (v/v), light yellow oil, yield 56.4mg (91%) <sup>1</sup>H NMR (500 MHz, CDCl<sub>3</sub>): δ 7.47 (d, *J* = 7.5 Hz, 1H), 7.44 (dd, *J* = 8.0, 1.0 Hz, 1H), 7.26 (dt, *J* = 7.8, 1.0 Hz, 1H), 7.15 (dt, *J* = 7.8, 1.0 Hz, 1H), 7.02 (d, *J* = 15.7 Hz, 1H), 6.25 (dt, *J* = 15.7, 6.1 Hz, 1H), 3.22 (dd, *J* = 6.1, 1.8 Hz, 2H), 0.27 (s, 9H), 0.18 (s, 9H). <sup>13</sup>C NMR (126 MHz, CDCl<sub>3</sub>): δ 139.01, 133.11, 129.85, 128.76, 127.03, 126.52, 125.38, 121.42, 103.81, 103.71, 99.18, 86.61, 24.04, 0.28, 0.20. HRMS (ESI): *m/z* 333.1454 [M+Na]<sup>+</sup>, calcd. for C<sub>19</sub>H<sub>26</sub>NaSi<sub>2</sub> 333.1471.

(*E*)-2-(5-phenylpent-1-en-4-yn-1-yl)-1,1'-biphenyl (**3ma**)

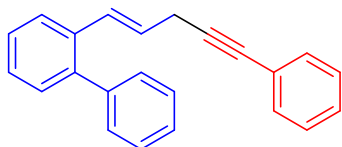

Eluent: EtOAc/petroleum ether 1/200 (v/v), light yellow oil, yield 52.3 mg (89%).  $^1\text{H}$  NMR (400 MHz,  $\text{CDCl}_3$ ):  $\delta$  7.65–7.59 (m, 1H), 7.43–7.21 (m, 13H), 6.77 (dt,  $J = 15.7, 1.9$  Hz, 1H), 6.20 (dt,  $J = 15.7, 5.5$  Hz, 1H), 3.28 (dd,  $J = 5.5, 1.9$  Hz, 2H).  $^{13}\text{C}$  NMR (101 MHz,  $\text{CDCl}_3$ ):  $\delta$  141.09, 140.89, 135.10, 131.71, 130.37, 130.33, 129.97, 128.25, 128.19, 127.83, 127.59, 127.39, 127.05, 125.94, 124.82, 123.68, 86.81, 83.14, 23.24. HRMS (ESI):  $m/z$  317.1284  $[\text{M}+\text{Na}]^+$ , calcd. for  $\text{C}_{23}\text{H}_{18}\text{Na}$  317.1306.

(*E*)-5-([1,1'-biphenyl]-2-yl)pent-4-en-1-yn-1-yl)trimethylsilane (**3mb**)

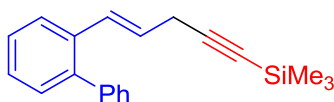

Eluent: EtOAc/petroleum ether 1/200 (v/v), light yellow oil, yield 57.8 mg (99%).  $^1\text{H}$  NMR (400 MHz,  $\text{CDCl}_3$ ):  $\delta$  7.69–7.62 (m, 1H), 7.53–7.45 (m, 2H), 7.45–7.32 (m, 6H), 6.76 (dt,  $J = 15.7, 1.9$  Hz, 1H), 6.17 (dt,  $J = 15.7, 5.4$  Hz, 1H), 3.18 (dd,  $J = 5.5, 1.9$  Hz, 2H), 0.15 (s, 9H).  $^{13}\text{C}$  NMR (101 MHz,  $\text{CDCl}_3$ ):  $\delta$  141.03, 140.82, 135.19, 130.36, 130.32, 129.91, 128.16, 127.54, 127.36, 127.10, 126.04, 124.64, 103.53, 87.29, 23.66, 0.14. HRMS (ESI):  $m/z$  313.1392  $[\text{M}+\text{Na}]^+$ , calcd. for  $\text{C}_{20}\text{H}_{22}\text{NaSi}$  313.1388.

(*E*)-1-(5-phenylpent-1-en-4-yn-1-yl)naphthalene (**3na**)<sup>6</sup>

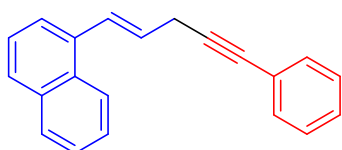

Eluent: EtOAc/petroleum ether 1/200 (v/v), light yellow oil, yield 41.4 mg (77%).  $^1\text{H}$  NMR (400 MHz,  $\text{CDCl}_3$ ):  $\delta$  8.19–8.10 (m, 1H), 7.88–7.82 (m, 1H), 7.77 (d,  $J = 8.2$  Hz, 1H), 7.59 (d,  $J = 7.2$  Hz, 1H), 7.55–7.40 (m, 6H), 7.35–7.27 (m, 3H), 6.27 (dt,  $J = 15.4, 5.5$  Hz, 1H), 3.48 (dd,  $J = 5.4, 1.9$  Hz, 2H).  $^{13}\text{C}$  NMR (101 MHz,  $\text{CDCl}_3$ ):  $\delta$  135.11, 133.72, 131.79, 131.29, 128.91, 128.61, 128.43, 128.00, 127.88, 127.54, 126.13, 125.88, 125.77, 124.05, 124.02, 123.80, 86.89, 83.29, 23.56.

(*E*)-trimethyl(5-(naphthalen-1-yl)pent-4-en-1-yn-1-yl)silane (**3nb**)

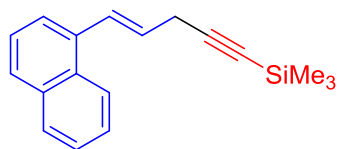

Eluent: EtOAc/petroleum ether 1/200 (v/v), light yellow oil, yield 52.5 mg (99%). <sup>1</sup>H NMR (400 MHz, CDCl<sub>3</sub>): δ 8.15–8.09 (m, 1H), 7.86–7.81 (m, 1H), 7.75 (d, *J* = 8.1 Hz, 1H), 7.55 (d, *J* = 7.0 Hz, 1H), 7.53–7.39 (m, 4H), 6.17 (dt, *J* = 15.5, 5.4 Hz, 1H), 3.28 (dd, *J* = 5.4, 2.0 Hz, 2H), 0.23 (s, 9H). <sup>13</sup>C NMR (101 MHz, CDCl<sub>3</sub>): δ 135.02, 133.74, 131.32, 128.88, 128.62, 127.85, 127.11, 126.09, 125.86, 125.76, 123.97, 123.90, 103.80, 87.70, 23.97, 0.28. HRMS (ESI): *m/z* 287.1227[M+Na]<sup>+</sup>, calcd. for C<sub>18</sub>H<sub>20</sub>NaSi 287.1232.

(*E*)-(5-(benzo[*b*]thiophen-3-yl)pent-4-en-1-yn-1-yl)trimethylsilane (**3o**)

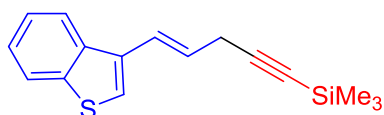

Eluent: EtOAc/petroleum ether 1/100 (v/v), light yellow oil, yield 32.8 mg (61%). <sup>1</sup>H NMR (400 MHz, CDCl<sub>3</sub>): δ 7.92–7.83 (m, 2H), 7.46–7.32 (m, 3H), 6.94 (d, *J* = 15.7 Hz, 1H), 6.24 (dt, *J* = 15.7, 5.5 Hz, 1H), 3.24 (dd, *J* = 5.5, 1.9 Hz, 2H), 0.22 (s, 9H). <sup>13</sup>C NMR (101 MHz, CDCl<sub>3</sub>): δ 140.53, 137.89, 133.87, 125.89, 124.55, 124.35, 123.86, 123.01, 122.02, 121.64, 103.54, 87.65, 23.86, 0.27. HRMS (ESI): *m/z* 271.0966 [M+H]<sup>+</sup>, calcd. for C<sub>16</sub>H<sub>19</sub>SSi 271.0977.

(*E*)-trimethyl(5-(thiophen-2-yl)pent-4-en-1-yn-1-yl)silane (**3p**)

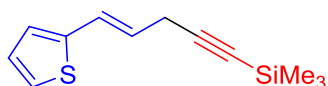

Eluent: EtOAc/petroleum ether 1/100 (v/v), light yellow oil, yield 40.1mg (91%). <sup>1</sup>H NMR (500 MHz, CDCl<sub>3</sub>): δ 7.13 (d, *J* = 5.0 Hz, 1H), 6.98–6.91 (m, 2H), 6.76 (d, *J* = 15.5 Hz, 1H), 6.00 (dt, *J* = 15.6, 5.6 Hz, 1H), 3.15 (dd, *J* = 5.6, 1.9 Hz, 2H), 0.19 (s, 9H). <sup>13</sup>C NMR (126 MHz, CDCl<sub>3</sub>): δ 142.20, 127.40, 125.31, 124.74, 123.98, 123.77, 103.29, 87.46, 23.35, 0.23. HRMS (ESI): *m/z* 221.0839 [M+H]<sup>+</sup>, calcd. for C<sub>12</sub>H<sub>17</sub>SSi 221.0820.

(*E*)-(5-(furan-2-yl)pent-4-en-1-yn-1-yl)trimethylsilane (**3q**)

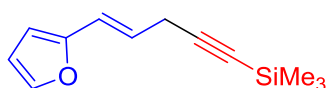

Eluent: EtOAc/petroleum ether 1/100 (v/v), light yellow oil, yield 20.8 mg (51%). <sup>1</sup>H NMR

(500 MHz, CDCl<sub>3</sub>):  $\delta$  7.33 (d,  $J$  = 1.8 Hz, 1H), 6.47 (dt,  $J$  = 15.7, 1.9 Hz, 1H), 6.36 (dd,  $J$  = 3.3, 1.8 Hz, 1H), 6.21 (d,  $J$  = 3.3 Hz, 1H), 6.11 (dt,  $J$  = 15.7, 5.6 Hz, 1H), 3.16 (dd,  $J$  = 5.6, 1.9 Hz, 2H), 0.19 (s, 9H). <sup>13</sup>C NMR (126 MHz, CDCl<sub>3</sub>):  $\delta$  152.78, 141.84, 122.83, 120.04, 111.31, 107.34, 103.29, 87.50, 23.29, 0.23. HRMS (ESI):  $m/z$  205.1066 [M+H]<sup>+</sup>, calcd. for C<sub>12</sub>H<sub>17</sub>OSi 205.1049.

(*E*)-trimethyl(3-methyl-5-phenylpent-4-en-1-yn-1-yl)silane (**3r**)<sup>7</sup>

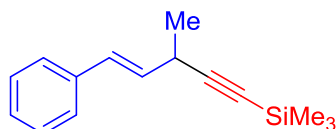

Eluent: EtOAc/petroleum ether 1/200 (v/v), light yellow oil, yield 44.9 mg (98%). <sup>1</sup>H NMR (400 MHz, CDCl<sub>3</sub>):  $\delta$  7.40–7.34 (m, 2H), 7.30 (t,  $J$  = 7.6 Hz, 2H), 7.21 (tt,  $J$  = 7.2, 2.2 Hz, 1H), 6.61 (dd,  $J$  = 15.7, 1.6 Hz, 1H), 6.14 (dd,  $J$  = 15.7, 6.1 Hz, 1H), 3.39–3.30 (m, 1H), 1.35 (d,  $J$  = 7.1 Hz, 3H), 0.19 (s, 9H). <sup>13</sup>C NMR (101 MHz, CDCl<sub>3</sub>):  $\delta$  137.29, 131.03, 129.69, 128.65, 127.44, 126.48, 108.77, 86.62, 30.07, 21.82, 0.35.

(*E*)-pent-1-en-4-yne-1,3,5-triyltribenzene (**3sa**)<sup>8</sup>

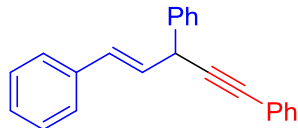

Eluent: EtOAc/petroleum ether 1/200 (v/v), light yellow oil, yield 54.6 mg (93%). <sup>1</sup>H NMR (400 MHz, CDCl<sub>3</sub>):  $\delta$  7.53–7.45 (m, 4H), 7.43–7.35 (m, 4H), 7.34–7.25 (m, 6H), 7.22 (tt,  $J$  = 7.2, 2.1 Hz, 1H), 6.78 (dd,  $J$  = 15.6, 1.4 Hz, 1H), 6.35 (dd,  $J$  = 15.6, 6.5 Hz, 1H), 4.76 (d,  $J$  = 6.5 Hz, 1H). <sup>13</sup>C NMR (101 MHz, CDCl<sub>3</sub>):  $\delta$  140.45, 136.98, 131.86, 130.60, 129.77, 128.86, 128.68, 128.40, 128.17, 127.90, 127.68, 127.25, 126.67, 123.59, 88.96, 85.55, 41.37.

(*E*)-(3,5-diphenylpent-4-en-1-yn-1-yl)trimethylsilane (**3sb**)<sup>8</sup>

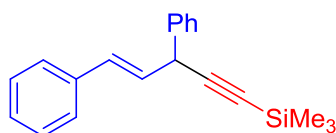

Eluent: EtOAc/petroleum ether 1/200 (v/v), light yellow oil, yield 52.4 mg (90%). <sup>1</sup>H NMR (400 MHz, CDCl<sub>3</sub>):  $\delta$  7.44–7.39 (m, 2H), 7.39–7.17 (m, 8H), 6.69 (dd,  $J$  = 15.6, 1.5 Hz, 1H), 6.23 (dd,  $J$  = 15.6, 6.6 Hz, 1H), 4.55 (dd,  $J$  = 6.6, 1.5 Hz, 1H), 0.22 (s, 9H). <sup>13</sup>C NMR (101 MHz, CDCl<sub>3</sub>):  $\delta$  140.09, 136.97, 130.54, 129.67, 128.78, 128.65, 127.83, 127.65, 127.16,

126.65, 105.44, 89.86, 41.73, 0.28.

(*E*)-1-methyl-4-(5-phenylpent-1-en-4-yn-1-yl)benzene (**3ta**)<sup>5</sup>

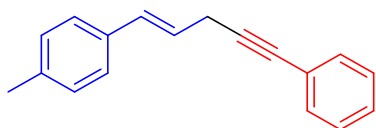

Eluent: EtOAc/petroleum ether 1/200 (v/v), light yellow oil, yield 36.2 mg (78%). <sup>1</sup>H NMR (400 MHz, CDCl<sub>3</sub>): δ 7.50–7.40 (m, 2H), 7.35–7.23 (m, 5H), 7.11 (d, *J* = 7.8 Hz, 2H), 6.67 (d, *J* = 15.7 Hz, 1H), 6.18 (dt, *J* = 15.7, 5.6 Hz, 1H), 3.34 (dd, *J* = 5.7, 1.8 Hz, 2H), 2.32 (s, 3H). <sup>13</sup>C NMR (101 MHz, CDCl<sub>3</sub>): δ 137.23, 134.44, 131.76, 131.38, 129.36, 128.37, 127.92, 126.30, 123.82, 123.30, 87.06, 82.90, 23.12, 21.31.

(*E*)-trimethyl(5-(*p*-tolyl)pent-4-en-1-yn-1-yl)silane (**3tb**)

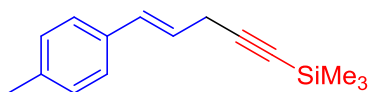

Eluent: EtOAc/petroleum ether 1/200 (v/v), colorless oil, yield 44.8 mg (98%). <sup>1</sup>H NMR (400 MHz, CDCl<sub>3</sub>): δ 7.25 (d, *J* = 8.1 Hz, 2H), 7.11 (d, *J* = 7.9 Hz, 2H), 6.59 (d, *J* = 15.7 Hz, 1H), 6.09 (dt, *J* = 15.7, 5.7 Hz, 1H), 3.16 (dd, *J* = 5.7, 1.8 Hz, 2H), 2.32 (s, 3H), 0.19 (s, 9H). <sup>13</sup>C NMR (101 MHz, CDCl<sub>3</sub>): δ 137.22, 134.44, 131.41, 129.34, 126.29, 123.05, 103.96, 87.07, 23.58, 21.31, 0.26. HRMS (ESI): *m/z* 229.1419[M+H]<sup>+</sup>, calcd. for C<sub>15</sub>H<sub>21</sub>Si 229.1412.

(*E*)-*N,N*-dimethyl-4-(5-(trimethylsilyl)pent-1-en-4-yn-1-yl)aniline (**3u**)

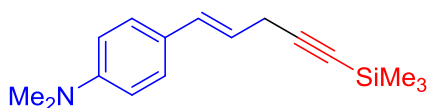

Eluent: EtOAc/petroleum ether 1/60 (v/v), light yellow oil, yield 48.9 mg (95%). <sup>1</sup>H NMR (500 MHz, CDCl<sub>3</sub>): δ 7.25 (d, *J* = 8.8 Hz, 2H), 6.67 (d, *J* = 8.8 Hz, 2H), 6.52 (d, *J* = 15.7 Hz, 1H), 5.94 (dt, *J* = 15.7, 5.8 Hz, 1H), 3.14 (dd, *J* = 5.8, 1.8 Hz, 2H), 2.95 (s, 6H), 0.19 (s, 9H). <sup>13</sup>C NMR (126 MHz, CDCl<sub>3</sub>): δ 150.05, 131.32, 127.27, 125.80, 119.71, 112.57, 104.57, 86.62, 40.70, 23.60, 0.28. HRMS (ESI): *m/z* 258.1676 [M+H]<sup>+</sup>, calcd. for C<sub>16</sub>H<sub>24</sub>NSi 258.1678.

(*E*)-dec-4-en-1-ynyltrimethylsilane (**3v1**) and trimethyl(3-vinyloct-1-ynyl)silane (**3v2**)<sup>9</sup>

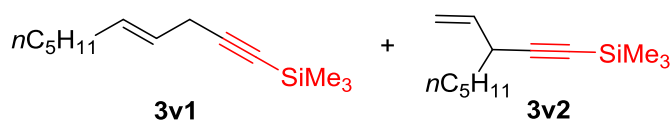

Eluent: petroleum ether, colorless oil, yield 26.9 mg (a mixture of **3v1** and **3v2**, 65% overall yield).  $^1\text{H}$  NMR (500 MHz,  $\text{CDCl}_3$ ):  $\delta$  5.79–5.71 (m, 0.9H), 5.71–5.63 (m, 1H), 5.42–5.34 (m, 1H), 5.28 (dt,  $J = 17.0$ , 1.6 Hz, 0.9H), 5.07 (dt,  $J = 10.1$ , 1.5 Hz, 0.9H), 3.10–3.03 (m, 0.9H), 2.96–2.92 (m, 2H), 2.05–1.98 (m, 2H), 1.54–1.21 (m, 14H), 0.93–0.84 (m, 6H), 0.162 (s, 9H), 0.16 (s, 8H).  $^{13}\text{C}$  NMR (126 MHz,  $\text{CDCl}_3$ ):  $\delta$  138.08, 132.67, 123.59, 115.07, 107.73, 104.94, 87.46, 86.20, 36.58, 35.34, 32.39, 31.64, 31.55, 29.08, 26.65, 23.24, 22.68, 22.66, 14.21, 14.16, 0.34, 0.28.

(*E*)-1-methyl-4-(5-phenylpent-4-en-1-yn-1-yl)benzene (**3ac**)<sup>3</sup>

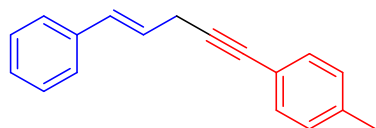

Eluent: EtOAc/petroleum ether 1/200 (v/v), light yellow oil, yield 45.9 mg (99%).  $^1\text{H}$  NMR (400 MHz,  $\text{CDCl}_3$ ):  $\delta$  7.42–7.26 (m, 6H), 7.25–7.18 (m, 1H), 7.10 (d,  $J = 7.8$  Hz, 2H), 6.70 (dt,  $J = 15.7$ , 1.9 Hz, 1H), 6.24 (dt,  $J = 15.7$ , 5.6 Hz, 1H), 3.35 (dd,  $J = 5.7$ , 1.9 Hz, 2H), 2.33 (s, 3H).  $^{13}\text{C}$  NMR (101 MHz,  $\text{CDCl}_3$ ):  $\delta$  137.97, 137.26, 131.63, 131.46, 129.14, 128.65, 127.44, 126.40, 124.54, 120.68, 86.05, 83.05, 23.17, 21.56.

(*E*)-1-methoxy-4-(5-phenylpent-4-en-1-yn-1-yl)benzene (**3ad**)<sup>3</sup>

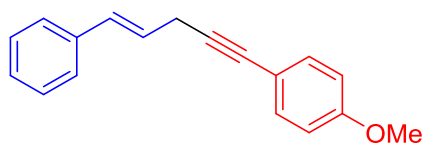

Eluent: EtOAc/petroleum ether 1/60 (v/v), light yellow oil, yield 44.6 mg (90%).  $^1\text{H}$  NMR (400 MHz,  $\text{CDCl}_3$ ):  $\delta$  7.42–7.35 (m, 4H), 7.30 (t,  $J = 7.6$  Hz, 2H), 7.22 (tt,  $J = 7.2$ , 2.4 Hz, 1H), 6.83 (d,  $J = 8.8$  Hz, 2H), 6.70 (dt,  $J = 15.7$ , 1.9 Hz, 1H), 6.24 (dt,  $J = 15.7$ , 5.6 Hz, 1H), 3.79 (s, 3H), 3.34 (dd,  $J = 5.7$ , 1.9 Hz, 2H).  $^{13}\text{C}$  NMR (101 MHz,  $\text{CDCl}_3$ ):  $\delta$  159.36, 137.27, 133.11, 131.41, 128.65, 127.43, 126.40, 124.65, 115.90, 113.99, 85.25, 82.75, 55.38, 23.17.

(*E*)-1-fluoro-4-(5-phenylpent-4-en-1-yn-1-yl)benzene (**3ae**)<sup>10</sup>

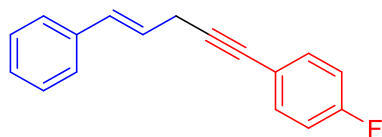

Eluent: EtOAc/petroleum ether 1/200 (v/v), light yellow oil, yield 37.6 mg (80%).  $^1\text{H}$  NMR (400 MHz,  $\text{CDCl}_3$ ):  $\delta$  7.47–7.35 (m, 4H), 7.31 (t,  $J = 7.5$  Hz, 2H), 7.27–7.19 (m, 1H), 6.99 (t,  $J = 8.8$  Hz, 2H), 6.69 (dt,  $J = 15.6, 1.9$  Hz, 1H), 6.24 (dt,  $J = 15.8, 5.7$  Hz, 1H), 3.34 (dd,  $J = 5.7, 1.9$  Hz, 2H).  $^{13}\text{C}$  NMR (101 MHz,  $\text{CDCl}_3$ ):  $\delta$  162.37 (d,  $J = 248.4$  Hz), 137.17, 133.57 (d,  $J = 8.3$  Hz), 131.63, 128.69, 127.54, 126.41, 124.26, 119.84 (d,  $J = 3.4$  Hz), 115.61 (d,  $J = 21.9$  Hz), 86.55 (d,  $J = 1.5$  Hz), 81.90, 23.09.  $^{19}\text{F}$  NMR (471 MHz,  $\text{CDCl}_3$ ):  $\delta$  -111.78.

(*E*)-non-1-en-4-yn-1-ylbenzene (**3af**)<sup>8</sup>

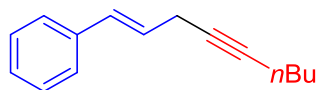

Eluent: EtOAc/petroleum ether 1/200 (v/v), colorless oil, yield 30.9 mg (78%).  $^1\text{H}$  NMR (500 MHz,  $\text{CDCl}_3$ ):  $\delta$  7.39–7.34 (m, 2H), 7.33–7.27 (m, 2H), 7.24–7.19 (m, 1H), 6.64 (dt,  $J = 15.7, 1.9$  Hz, 1H), 6.18 (dt,  $J = 15.7, 5.6$  Hz, 1H), 3.14–3.08 (m, 2H), 2.27–2.19 (m, 2H), 1.56–1.48 (m, 2H), 1.48–1.39 (m, 2H), 0.93 (t,  $J = 7.2$  Hz, 3H).  $^{13}\text{C}$  NMR (126 MHz,  $\text{CDCl}_3$ ):  $\delta$  137.39, 130.92, 128.63, 127.31, 126.35, 125.43, 83.12, 76.77, 31.26, 22.55, 22.12, 18.66, 13.80.

(*E*)-(5-cyclopropylpent-1-en-4-yn-1-yl)benzene (**3ag**)<sup>10</sup>

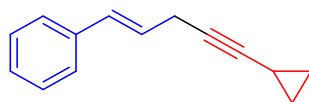

Eluent: EtOAc/petroleum ether 1/200 (v/v), light yellow oil, yield 34.6 mg (95%).  $^1\text{H}$  NMR (500 MHz,  $\text{CDCl}_3$ ):  $\delta$  7.38–7.33 (m, 2H), 7.32–7.26 (m, 2H), 7.23–7.18 (m, 1H), 6.60 (d,  $J = 15.6$  Hz, 1H), 6.15 (dt,  $J = 15.7, 5.7$  Hz, 1H), 3.07 (dt,  $J = 5.7, 1.9$  Hz, 2H), 1.32–1.22 (m, 1H), 0.78–0.71 (m, 2H), 0.70–0.64 (m, 2H).  $^{13}\text{C}$  NMR (126 MHz,  $\text{CDCl}_3$ ):  $\delta$  137.33, 130.98, 128.61, 127.32, 126.34, 125.28, 85.93, 72.31, 22.54, 8.18, -0.27.

## 6. Gram scale reaction

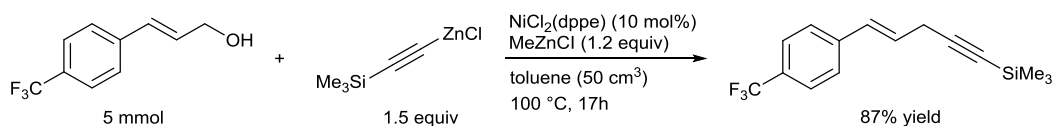



NiCl<sub>2</sub>(dppe) (0.264 g, 10 mol %), (*E*)-3-(4-(trifluoromethyl)phenyl)prop-2-en-1-ol (1.01 g, 5 mmol) and THF (3 mL) were charged to a Schlenk tube. To the stirred mixture was added MeZnCl (8.34 mL, 0.72 M solution in THF, 6 mmol) at room temperature. After the mixture was stirred for 5 min, a solution of alkynylzinc reagent (16.3 mL, 0.46 M solution in THF, 7.5 mmol) was added, and the solution was stirred for an additional 5 min. Solvent was removed in vacuo and then toluene (50 mL) was added. and the reaction mixture was heated at 100 °C (oil bath) for 17 h, allowed to cool to rt. A 20% aqueous solution of NH<sub>4</sub>Cl (60 mL) was added. The mixture was extracted with ethyl acetate (3 × 60 mL). The combined organic phases were dried over anhydrous Na<sub>2</sub>SO<sub>4</sub> and concentrated under reduced pressure. The residue was purified by column chromatography on silica gel (eluent: petroleum ether/EtOAc = 120:1) to afford the desired coupling product (1.23 g, 87%).

## 7. Transformation of 1,4-enynes

(1) Transformation of **3hb** to (*E*)-1-(pent-1-en-3-yn-1-yl)-4-(trifluoromethyl)benzene (**4**)<sup>11</sup>

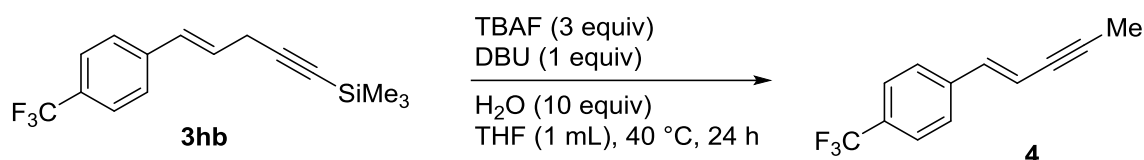

1,4-enyne **3hb** (28.2 mg, 0.1 mmol) was dissolved in anhydrous THF (1 mL) under N<sub>2</sub> atmosphere in a Schlenk tube. Then, H<sub>2</sub>O (18 mg, 1 mmol), DBU (15.2 mg, 0.1 mmol), and TBAF (0.3 mL, 1 M solution in THF, 0.3 mmol) were added into the solution. The mixture was stirred at 40 °C for 24 h. The reaction mixture was poured into water and extracted with dichloromethane. The combined organic layers were dried over MgSO<sub>4</sub>, and concentrated under reduced pressure to give a crude product. The crude product was purified by column chromatography (eluent: petroleum ether) to give **4**<sup>12</sup> (15.1 mg, 72%) as a white solid. <sup>1</sup>H NMR (500 MHz, CDCl<sub>3</sub>): δ 7.56 (d, *J* = 7.9 Hz, 2H), 7.44 (d, *J* = 7.9 Hz, 2H), 6.87 (d, *J* = 16.2 Hz, 1H), 6.22 (d, *J* = 16.1 Hz, 1H), 2.03 (s, 3H). <sup>13</sup>C NMR (126 MHz, CDCl<sub>3</sub>): δ 140.06, 138.57, 130.03 (q, *J* = 32.7 Hz), 126.29, 125.76 (q, *J* = 3.8 Hz), 124.23 (q, *J* = 272.5 Hz), 111.78, 90.22, 78.64, 4.70. <sup>19</sup>F NMR (471 MHz, CDCl<sub>3</sub>): δ -62.62.

The reaction did not yield a naphthalene derivative under the present conditions. In the absence of H<sub>2</sub>O and DBU the reaction gave **4** in very low yield. In the absence of DBU the reaction gave **4** in good yield along with a small amount of unidentified side products.

(2) Transformation of **3hb** to ethyl (*E*)-4-(5-(4-(trifluoromethyl)phenyl)pent-4-en-1-yn-1-yl) benzoate (**5**)<sup>13</sup>

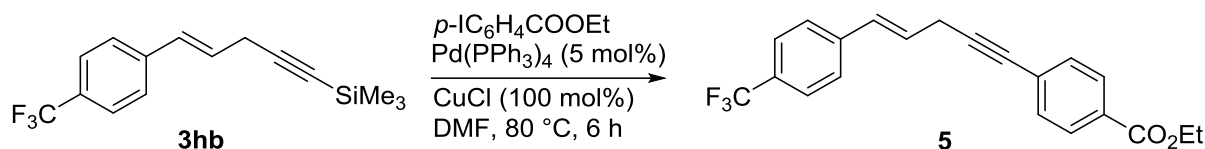

Pd(PPh<sub>3</sub>)<sub>4</sub> (11.6 mg, 5 mol %), CuCl (19.8 mg, 0.2 mmol), dry DMF (1 mL), **3hb** (112.8 mg, 0.4 mmol) and ethyl 4-iodobenzoate (55.2 mg, 0.2 mmol) were successively added to a Schlenk tube at room temperature. The mixture was heated at 80 °C (oil bath) for 6 h with stirring. After cooled to room temperature, the mixture was quenched with 1 M HCl and extracted with diethyl ether. The combined organic layers were washed with brine and dried over anhydrous MgSO<sub>4</sub>. Filtration and concentration with a rotary evaporator gave a viscous oil which was purified by column chromatography on silica gel (eluent: petroleum ether/ethyl acetate = 50:1) to give **5** (58.6 mg, 82%) as a yellow solid. <sup>1</sup>H NMR (500 MHz, CDCl<sub>3</sub>): δ 7.99 (d, *J* = 7.6 Hz, 2H), 7.65–7.38 (m, 6H), 6.74 (d, *J* = 15.7 Hz, 1H), 6.42–6.27 (m, 1H), 4.38 (q, *J* = 6.8 Hz, 2H), 3.41 (d, *J* = 4.2 Hz, 2H), 1.40 (t, *J* = 6.7 Hz, 3H). <sup>13</sup>C NMR (126 MHz, CDCl<sub>3</sub>): δ 166.24, 140.54, 131.67, 130.63, 129.82, 129.58, 129.30, 128.21, 126.69, 126.59, 125.67 (q, *J* = 3.7 Hz), 124.33 (q, *J* = 272.3 Hz), 89.45, 82.82, 61.26, 23.26, 14.45. <sup>19</sup>F NMR (471 MHz, CDCl<sub>3</sub>): δ –62.47. HRMS (ESI): *m/z* 359.1256 [M+H]<sup>+</sup>, calcd. for C<sub>21</sub>H<sub>18</sub>F<sub>3</sub>O<sub>2</sub> 359.1259.

## 8. Mechanistic studies

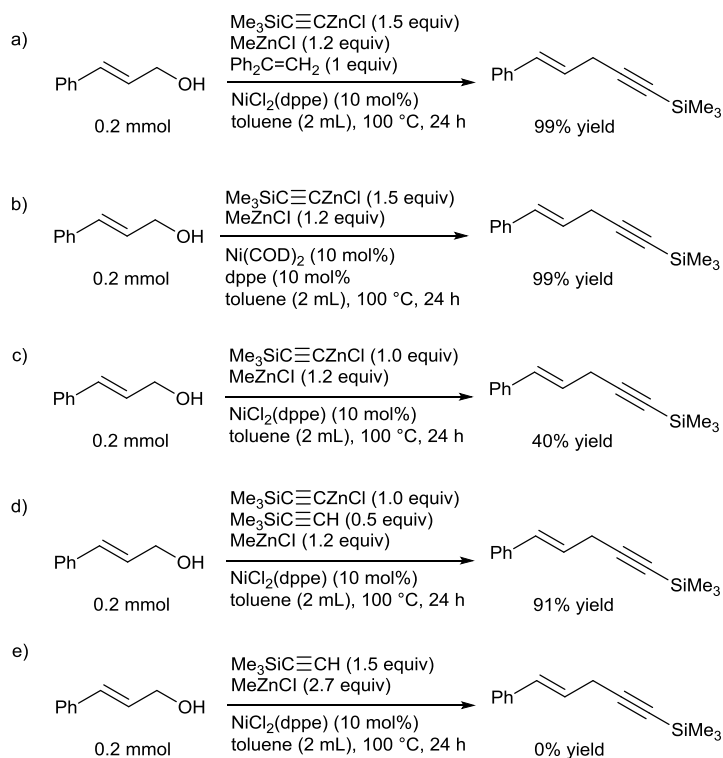

(a)  $\text{NiCl}_2(\text{dppe})$  (10.6 mg, 10 mol %) and cinnamyl alcohol (0.5 mL, 0.4 M solution in THF, 0.2 mmol) were charged to a Schlenk tube under nitrogen. To the stirred mixture was added  $\text{MeZnCl}$  (0.42 mL, 0.57 M solution in THF, 0.24 mmol) at room temperature. After the mixture was stirred for 5 min, a solution of  $\text{Me}_3\text{SiC}\equiv\text{CZnCl}$  (0.65 mL, 0.46 M solution in THF, 0.3 mmol) was added. The resulting solution was stirred for an additional 5 min. Solvent was removed in vacuo and toluene (2 mL) and  $\text{Ph}_2\text{C}=\text{CH}_2$  (36 mg, 0.2 mmol) was successively added. The reaction mixture was heated at 100 °C (oil bath) for 24 h and then cooled to room temperature. The reaction mixture was passed through a short pad of celite (eluting with ethyl acetate) and then concentrated under reduced pressure. The yield (99%) was determined by NMR spectral analysis using 1,1,2,2-tetrachloroethane as an internal standard.

(2)  $\text{Ni}(\text{COD})_2$  (5.5 mg, 10 mol %), dppe (8 mg, 10 mol %) and cinnamyl alcohol (0.5 mL, 0.4 M solution in THF, 0.2 mmol) were charged to a Schlenk tube under nitrogen. To the stirred mixture was added  $\text{MeZnCl}$  (0.42 mL, 0.57 M solution in THF, 0.24 mmol) at room temperature. After the mixture was stirred for 5 min, a solution of  $\text{Me}_3\text{SiC}\equiv\text{CZnCl}$  (0.65 mL, 0.46 M solution in THF, 0.3 mmol) was added. The resulting mixture was stirred for an additional 5 min. Solvent was removed in vacuo and toluene (2 mL) was added. The reaction mixture was heated at 100 °C (oil bath) for 24 h and then cooled to room temperature. The resulting mixture was passed through a short pad of celite (eluting with ethyl acetate) and then concentrated under reduced pressure. The yield (99%) was determined by NMR spectral analysis using 1,1,2,2-tetrachloroethane as an internal standard.

(3)  $\text{NiCl}_2(\text{dppe})$  (10.6 mg, 10 mol %) and cinnamyl alcohol (0.5 mL, 0.4 M in THF, 0.2 mmol) were charged to a Schlenk tube under nitrogen. To the stirred mixture was added  $\text{MeZnCl}$  (0.42 mL, 0.57 M solution in THF, 0.24 mmol) at room temperature. After the mixture was stirred for 5 min, a solution of  $\text{Me}_3\text{SiC}\equiv\text{CZnCl}$  (0.44 mL, 0.46 M solution in THF, 0.2 mmol) was added. The resulting solution was stirred for an additional 5 min. Solvent was removed in vacuo and then toluene (2 mL) was added. The reaction mixture was heated at 100 °C (oil bath) for 24 h and then cooled to room temperature. The mixture was passed through a short pad of celite (eluting with ethyl acetate) and then concentrated under reduced pressure. The yield (40%) was determined by NMR spectral analysis using 1,1,2,2-tetrachloroethane as an internal standard.

(4) NiCl<sub>2</sub>(dppe) (10.6 mg, 10 mol %) and cinnamyl alcohol (0.5 mL, 0.4 M in THF, 0.2 mmol) were charged to a Schlenk tube under nitrogen. To the stirred mixture was added MeZnCl (0.42 mL, 0.57 M solution in THF, 0.24 mmol) at room temperature. After the mixture was stirred for 5 min, a solution of Me<sub>3</sub>SiC≡CZnCl (0.44 mL, 0.46 M solution in THF, 0.2 mmol) was added. The resulting solution was stirred for an additional 5 min. Solvent was removed in vacuo and then toluene (2 mL) and Me<sub>3</sub>SiC≡CH (9.8 mg, 0.1 mmol) was successively added. The reaction mixture was heated at 100 °C (oil bath) for 24 h and then cooled to room temperature. The mixture was passed through a short pad of celite (eluting with ethyl acetate) and concentrated under reduced pressure. The yield (91%) was determined by NMR spectral analysis using 1,1,2,2-tetrachloroethane as an internal standard.

(5) NiCl<sub>2</sub>(dppe) (10.6 mg, 10 mol %) and cinnamyl alcohol (0.5 mL, 0.4 M in THF, 0.2 mmol) were charged to a Schlenk tube under nitrogen. To the stirred mixture was added MeZnCl (0.95 mL, 0.57 M solution in THF, 0.54 mmol) at room temperature. After the mixture was stirred for 5 min, solvent was removed in vacuo and then toluene (2 mL) and ethynyltrimethylsilane (29.5 mg, 0.3 mmol) were added. The reaction mixture was heated at 100 °C (oil bath) for 24 h with stirring and then cooled to room temperature. The resulting mixture was passed through a short pad of celite with ethyl acetate and concentrated under reduced pressure. The residue was determined using <sup>1</sup>H NMR spectrum. No expected product was observed.

## 9. References

- 1 A. Krasovskiy and P. Knochel, *Synthesis*, 2006, **5**, 0890.
- 2 B. Yang and Z.-X. Wang, *Org. Lett.*, 2019, **21**, 7965.
- 3 Y.-X. Li, Q.-Q. Xuan, L. Liu, D. Wang, Y.-J. Chen and C.-J. Li, *J. Am. Chem. Soc.*, 2013, **135**, 12536.
- 4 D.-K. Rayabarapu and J.-A. Tunge, *J. Am. Chem. Soc.*, 2005, **127**, 13510.
- 5 X.-L. Zhou, L. Ren and P.-S. Wang, *J. Org. Chem.*, 2017, **82**, 9794.
- 6 Y. Horino, M. Ishibashi, K. Nakasai and T. Korenaga, *Tetrahedron*, 2020, **76**, 131493.
- 7 Q. Wang and Y. Kobayashi, *Tetrahedron Lett.*, 2010, **51**, 5592.
- 8 Z.-L. Yang, R.-K. Kumar, P.-Q. Liao, Z.-H. Liu, X.-Q. Li and X.-H. Bi, *Chem. Commun.*, 2016, **52**, 5936.
- 9 (a) R. Yalla and S. Raghavan, *Org. Biomol. Chem.*, 2019, **17**, 4572; (b) R. S. Brinkmeyer and T. L. Macdonald, *J. Chem. Soc., Chem. Commun.*, 1978, 876.

- 10 P.-Z. Xie, Z.-L. Sun, S.-S. Li, L. Zhang, X.-Y. Cai, W.-S. Fu, X.-B. Yang, Y.-N. Liu, X.-Y. Wo and T.-P. Loh, *Org. Lett.*, 2020, **22**, 1599.
- 11 Y. Li, L. Liu, D. Kong, D. Wang, W. Feng, T. Yue and C. Li, *J. Org. Chem.*, 2015, **80**, 6283.
- 12 Y.-Z. Zhang, B. Li and S.-Y. Liu, *Angew. Chem. Int. Ed.*, 2020, **59**, 15928.
- 13 Y. Nishihara, E. Inoue, D. Ogawa, Y. Okada, S. Noyori and K. Takagi, *Tetrahedron Lett.*, 2009, **50**, 4643.

## 10. Copies of NMR spectra of the reaction products

### (1) (*E*)-pent-1-en-4-yne-1,5-diylidibenzene (**3aa**)

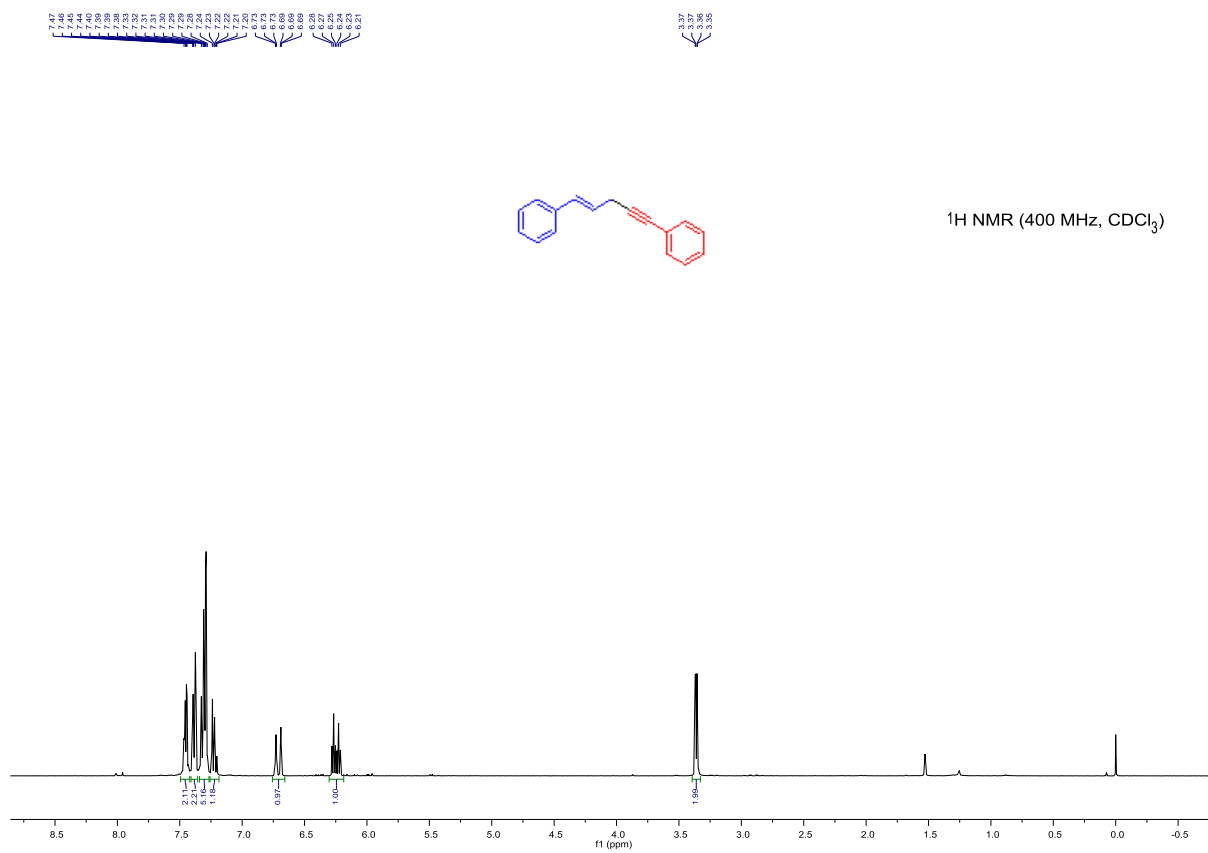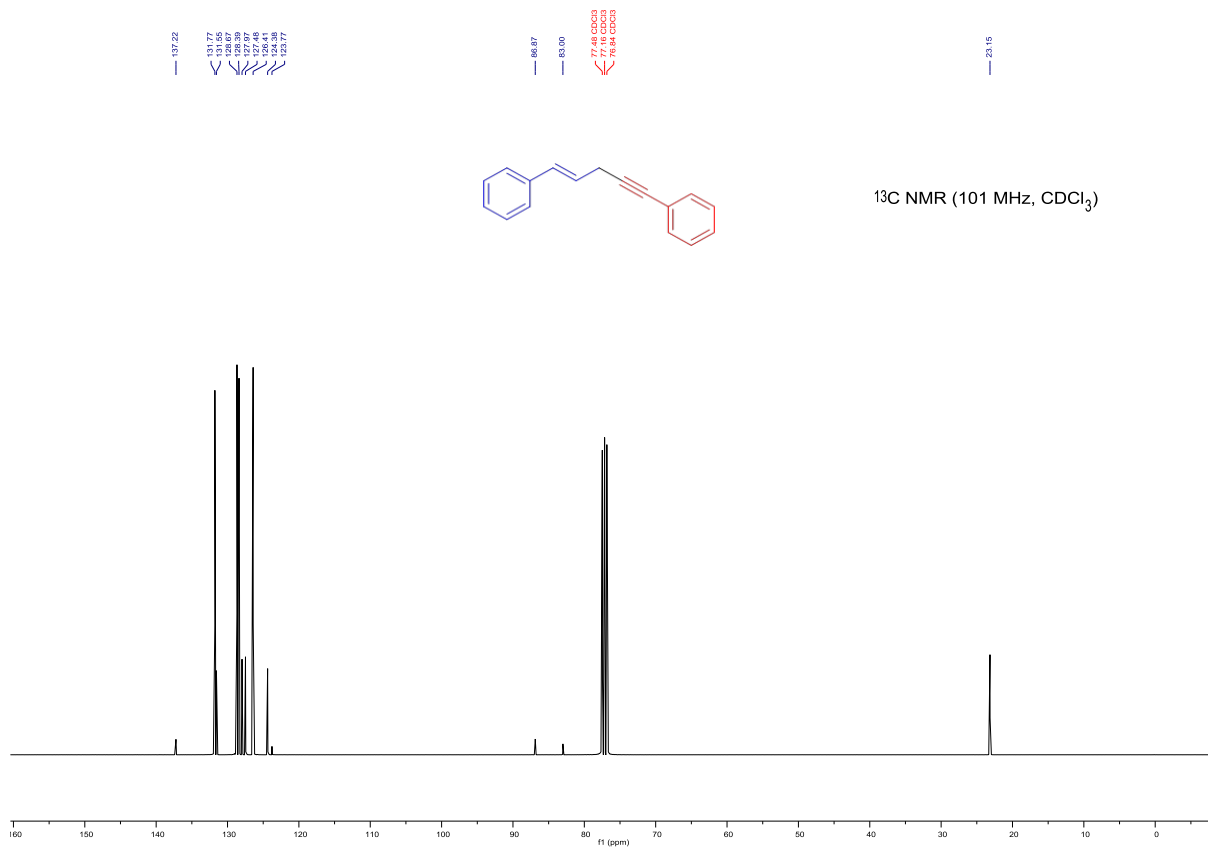

(2) (*E*)-trimethyl(5-phenylpent-4-en-1-yn-1-yl)silane (**3ab**)

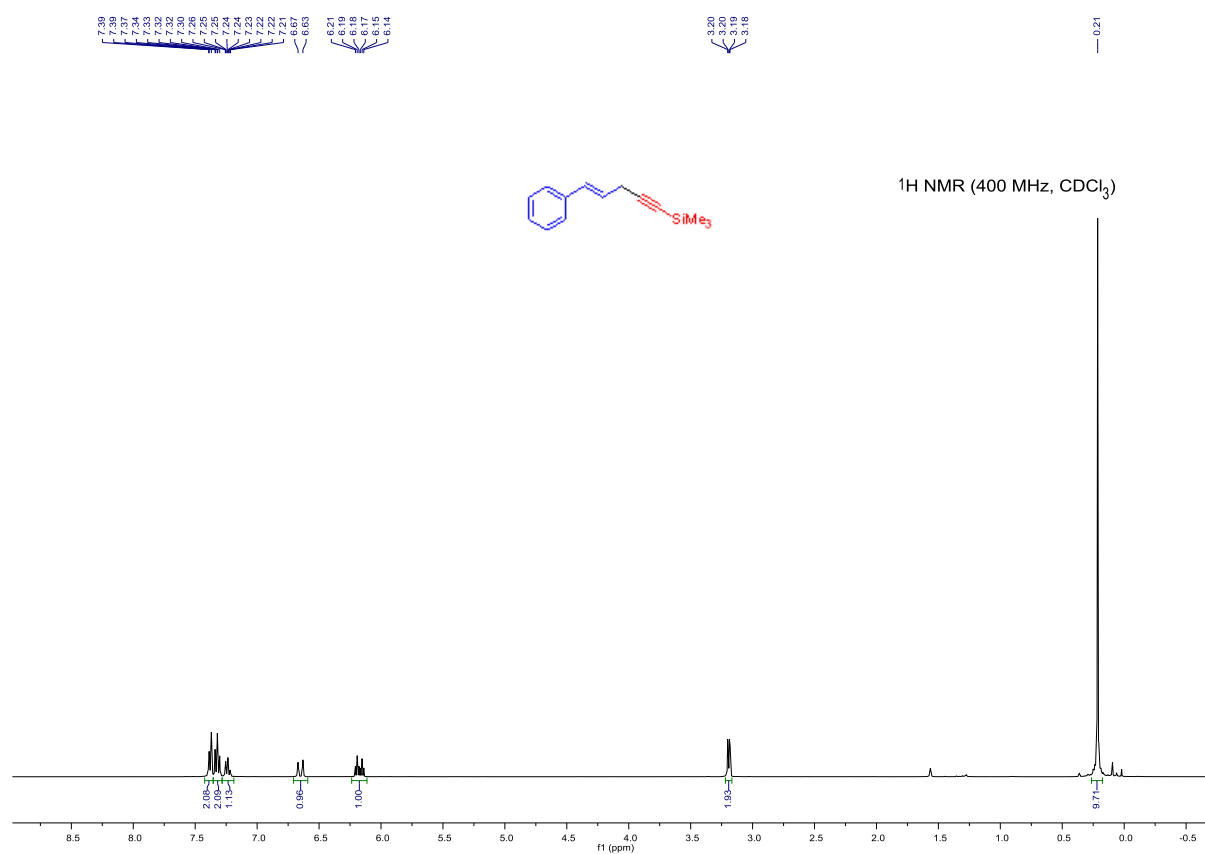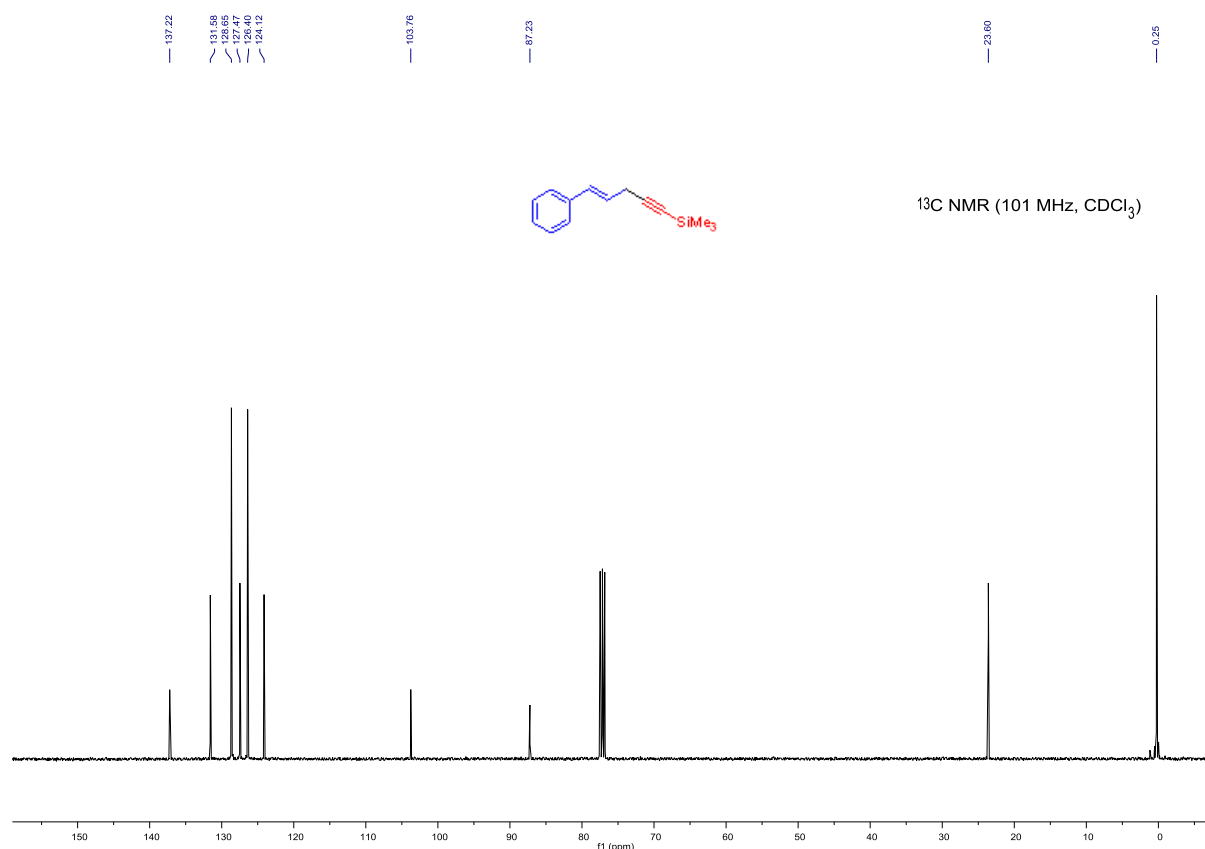

(3) (*E*)-1-methoxy-4-(5-phenylpent-1-en-4-yn-1-yl)benzene (**3ba**)

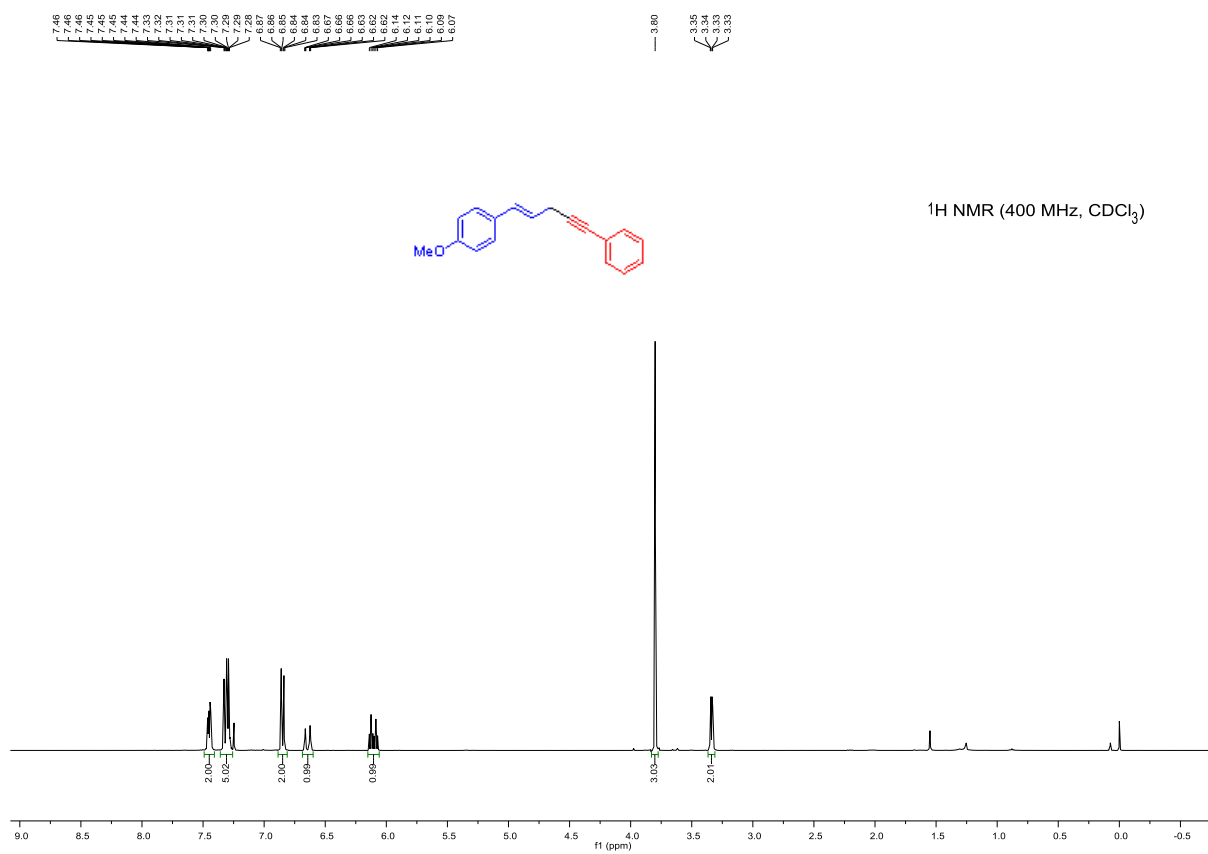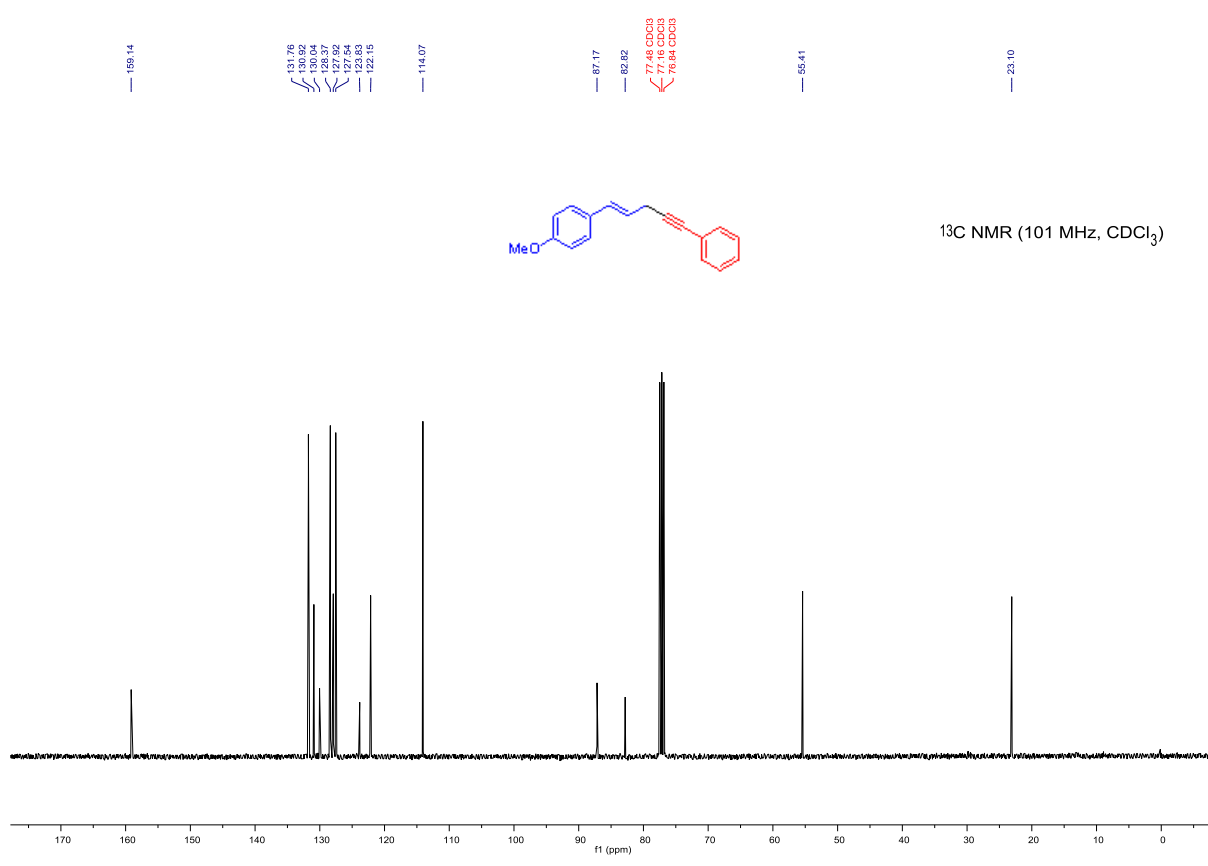



(4) (*E*)-(5-(4-methoxyphenyl)pent-4-en-1-yn-1-yl)trimethylsilane (**3bb**)

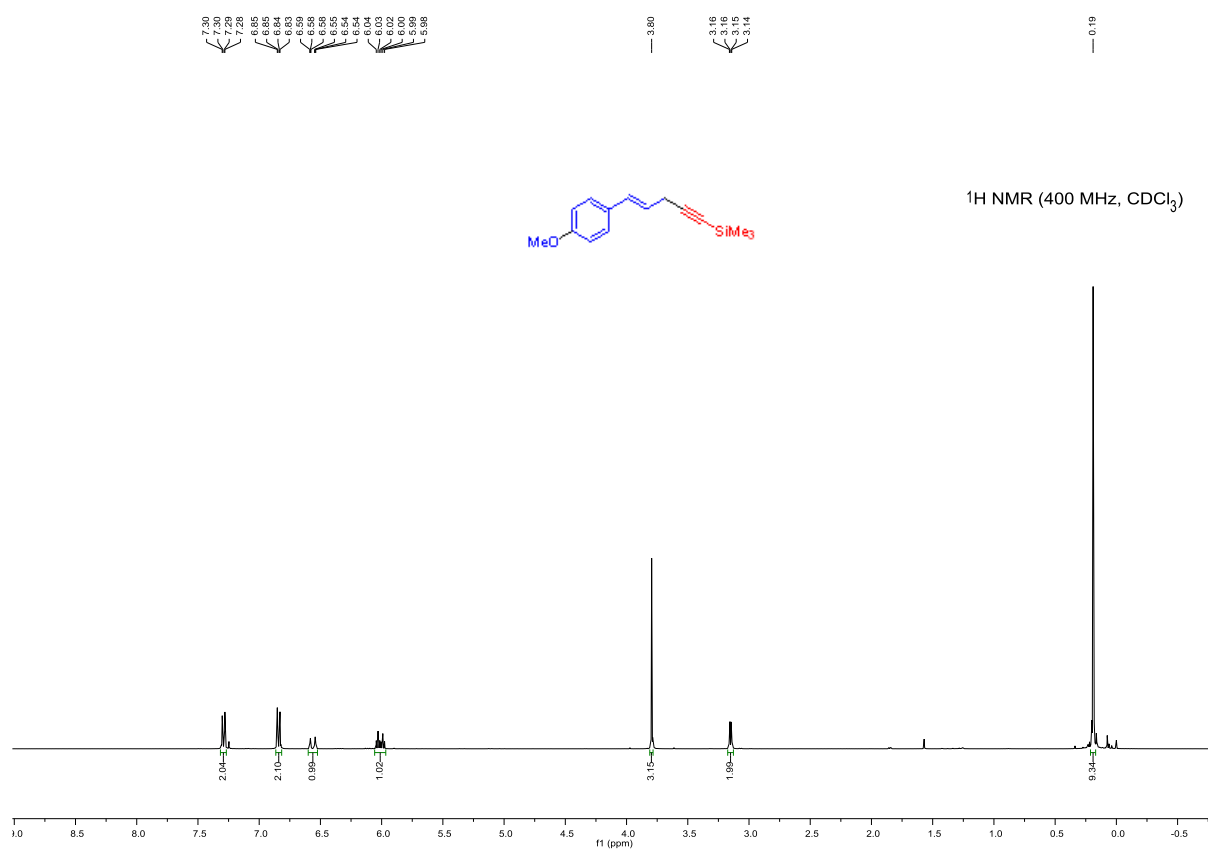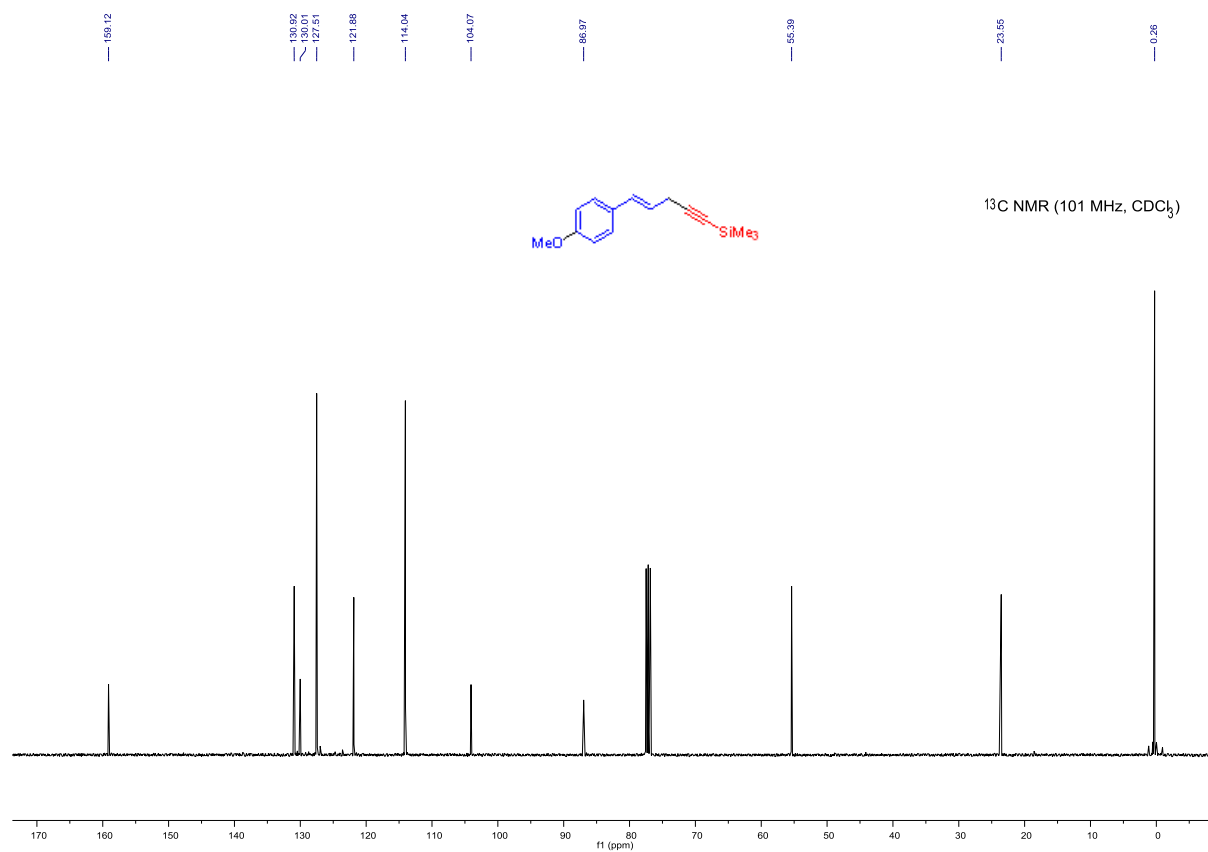



(6) (*E*)-trimethyl(5-(4-(methylthio)phenyl)pent-4-en-1-yn-1-yl)silane (**3cb**)

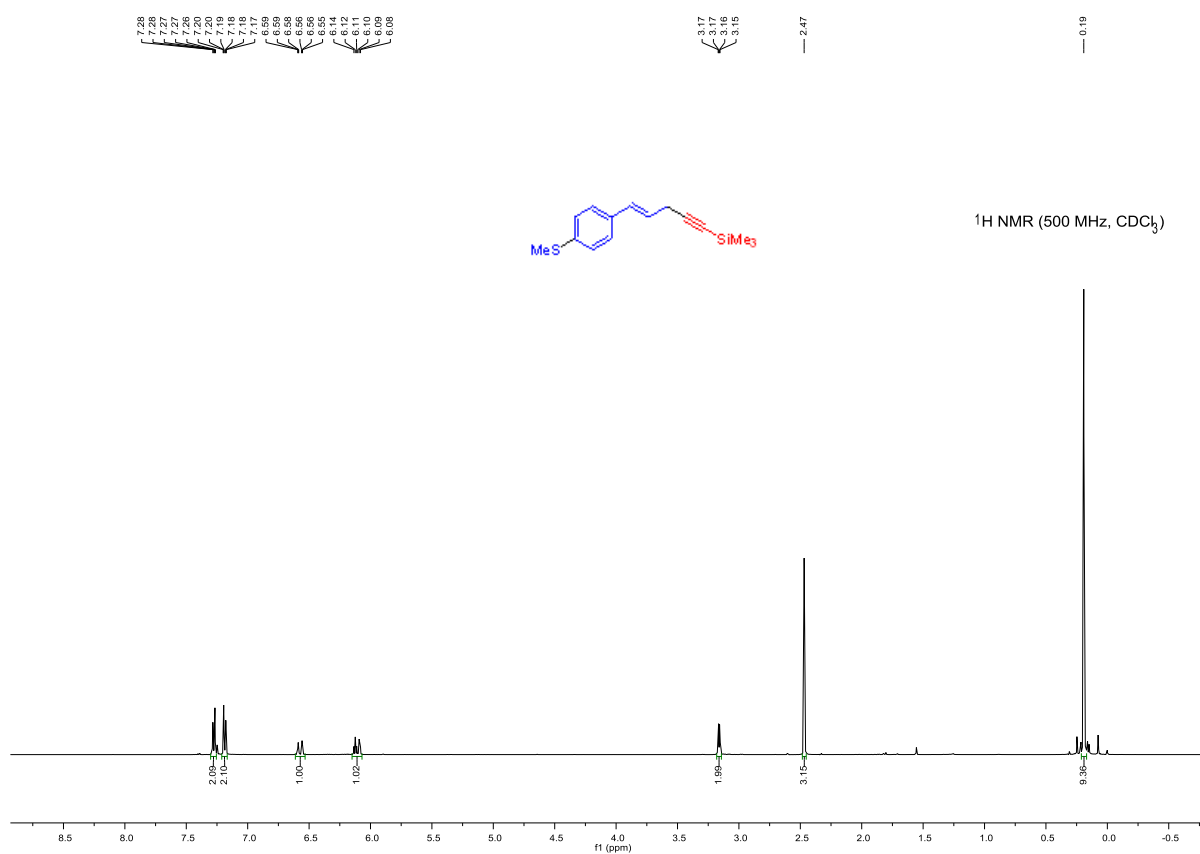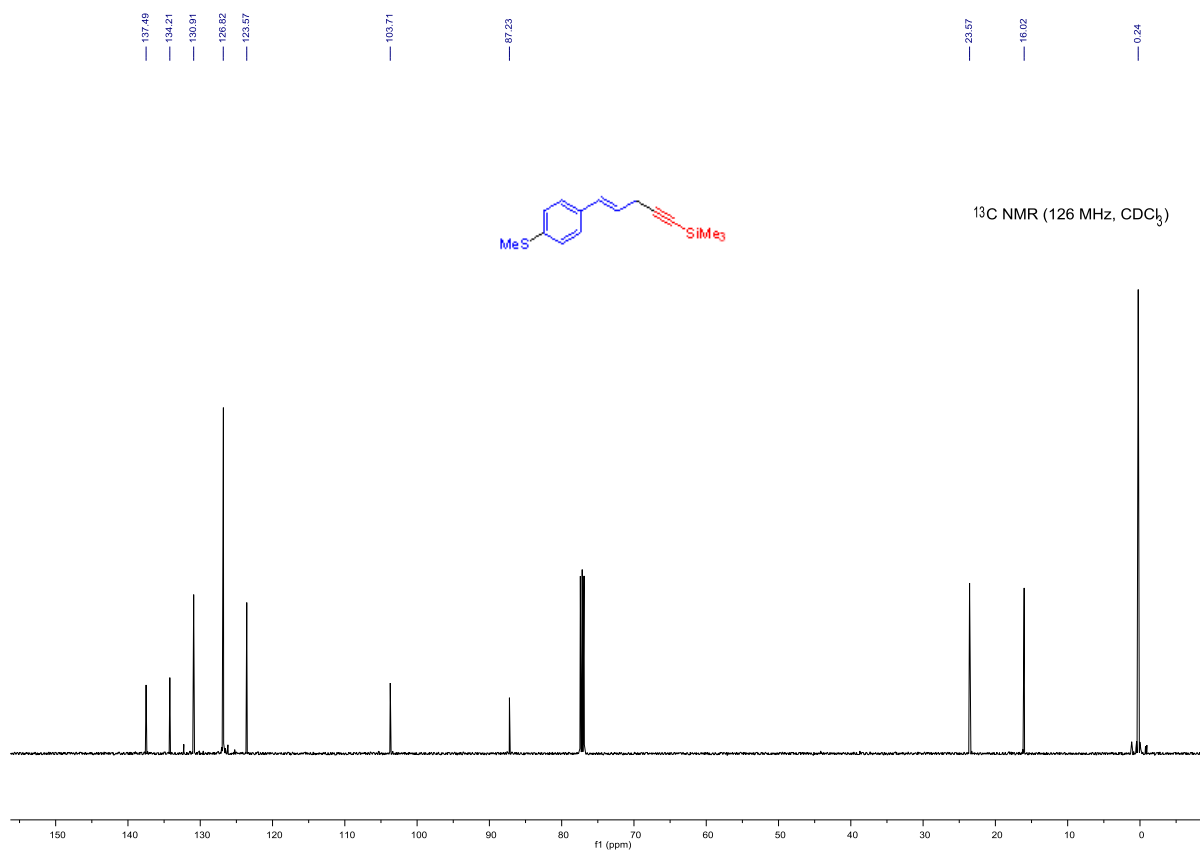

(7) (*E*)-1-methoxy-3-(5-phenylpent-1-en-4-yn-1-yl)benzene (**3d**)

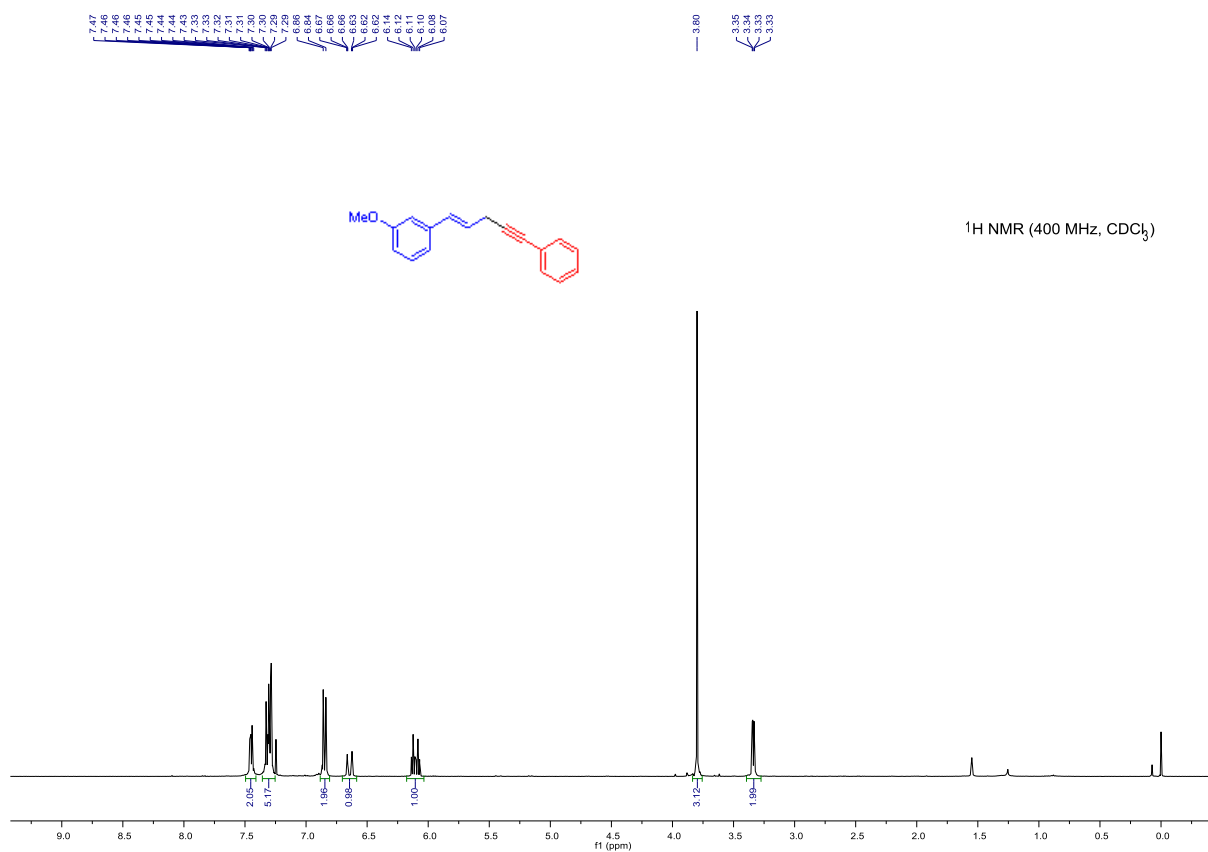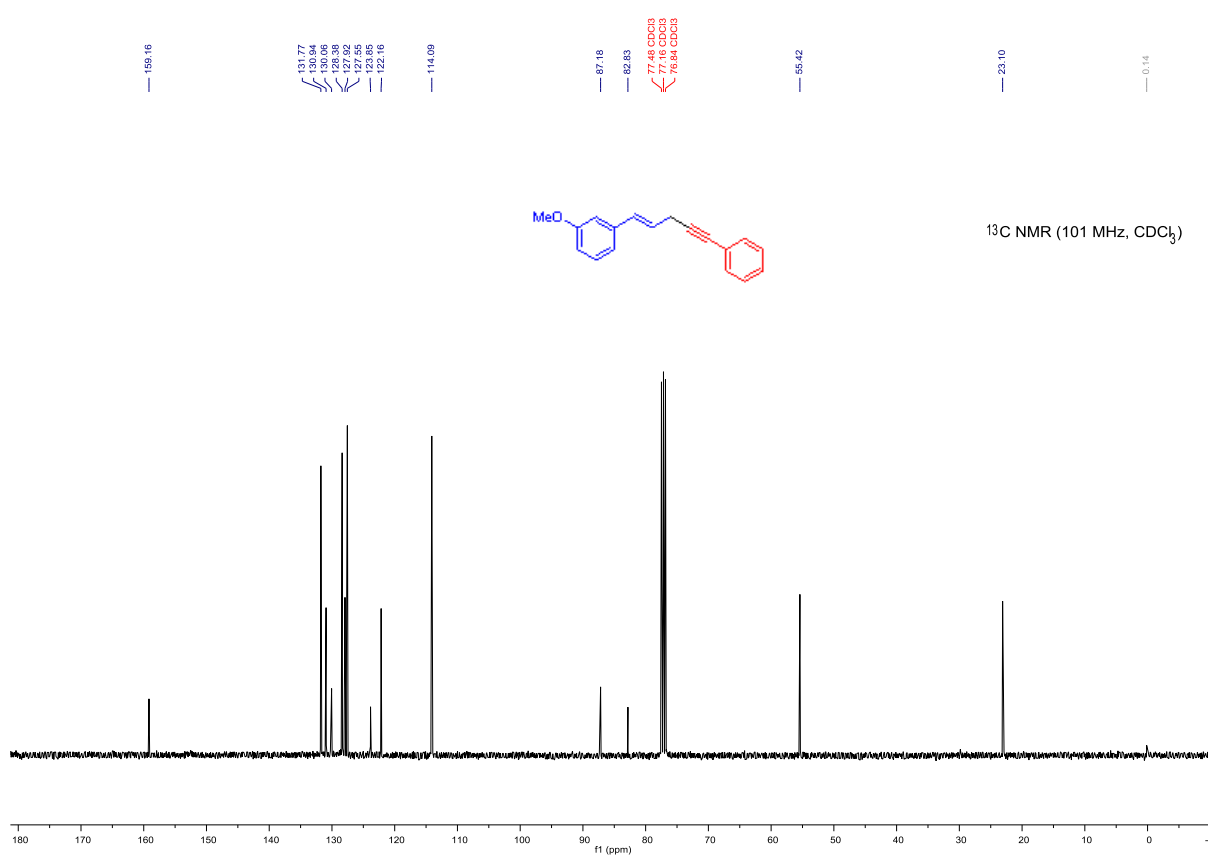

(8) (*E*)-1-phenoxy-3-(5-phenylpent-1-en-4-yn-1-yl)benzene (**3ea**)

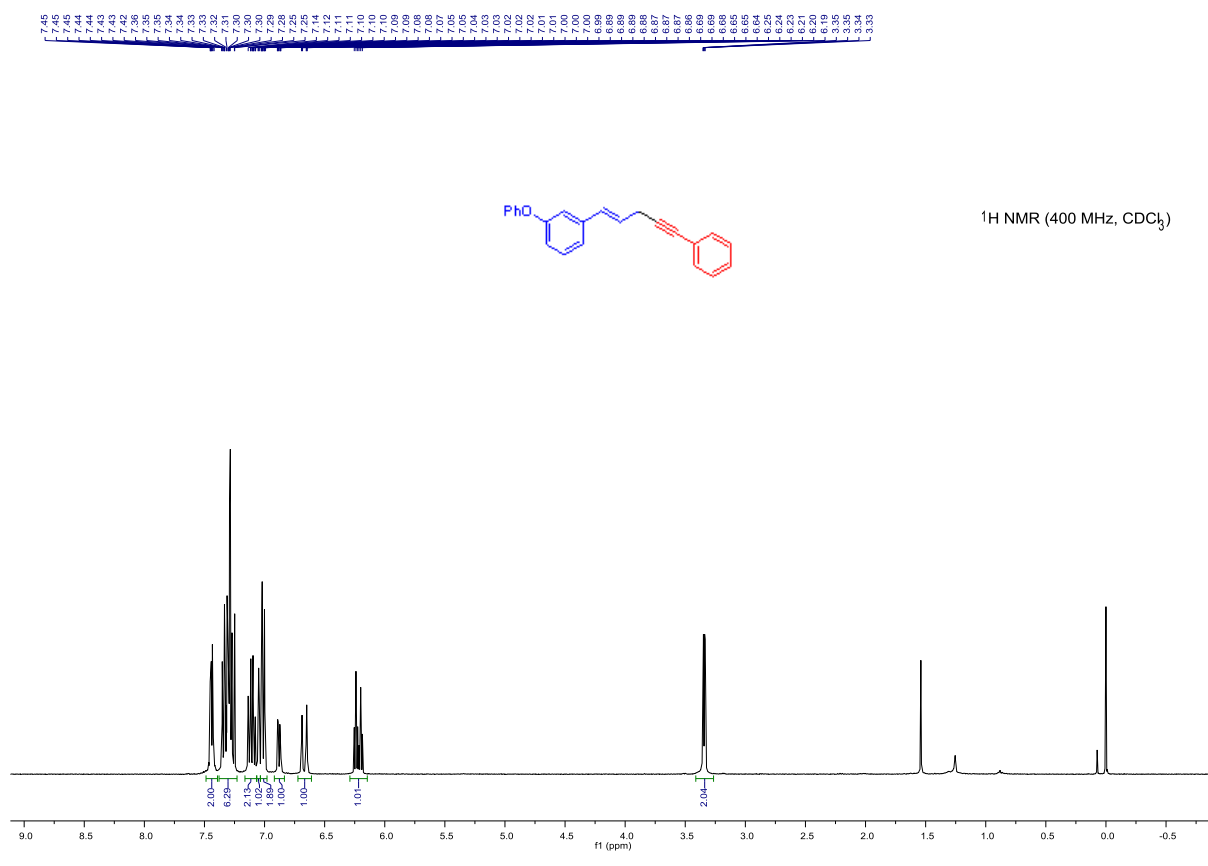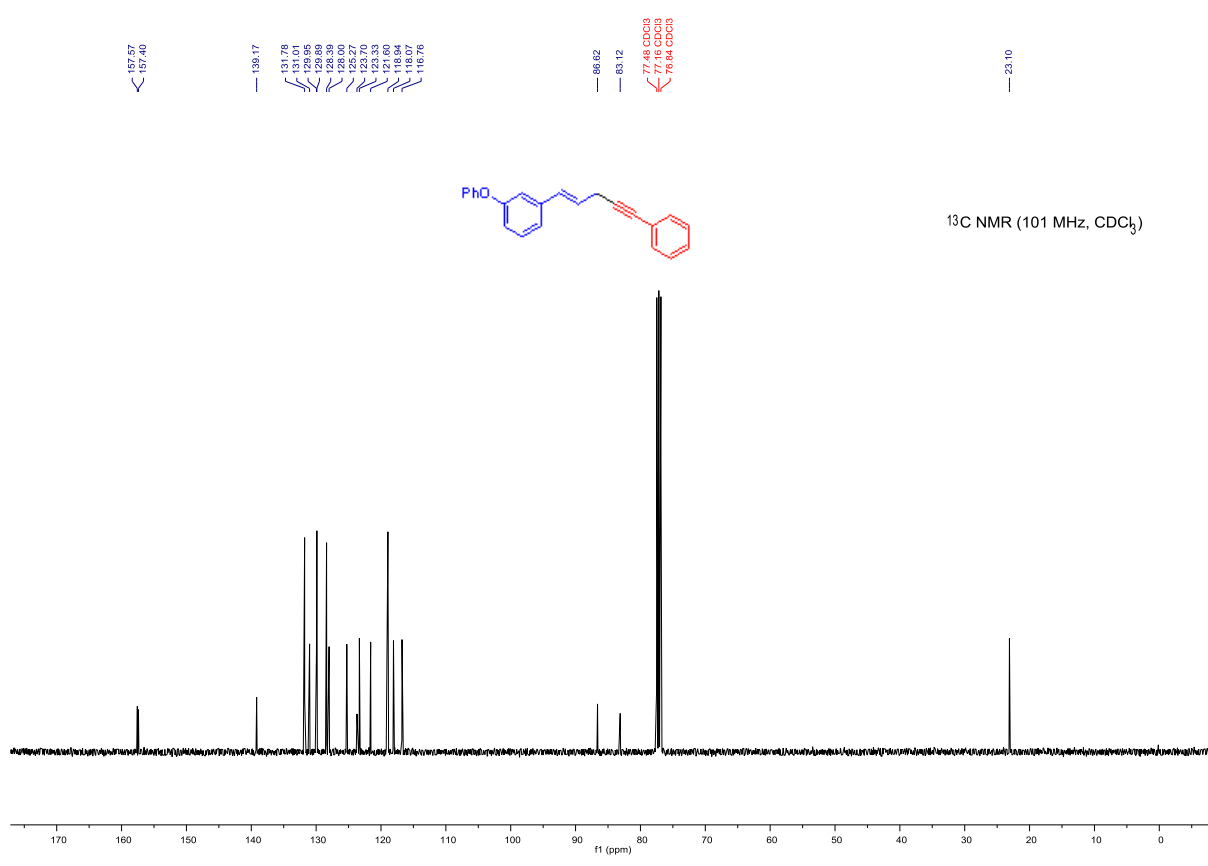

(9) (*E*)-trimethyl(5-(3-phenoxyphenyl)pent-4-en-1-yn-1-yl)silane (**3eb**)

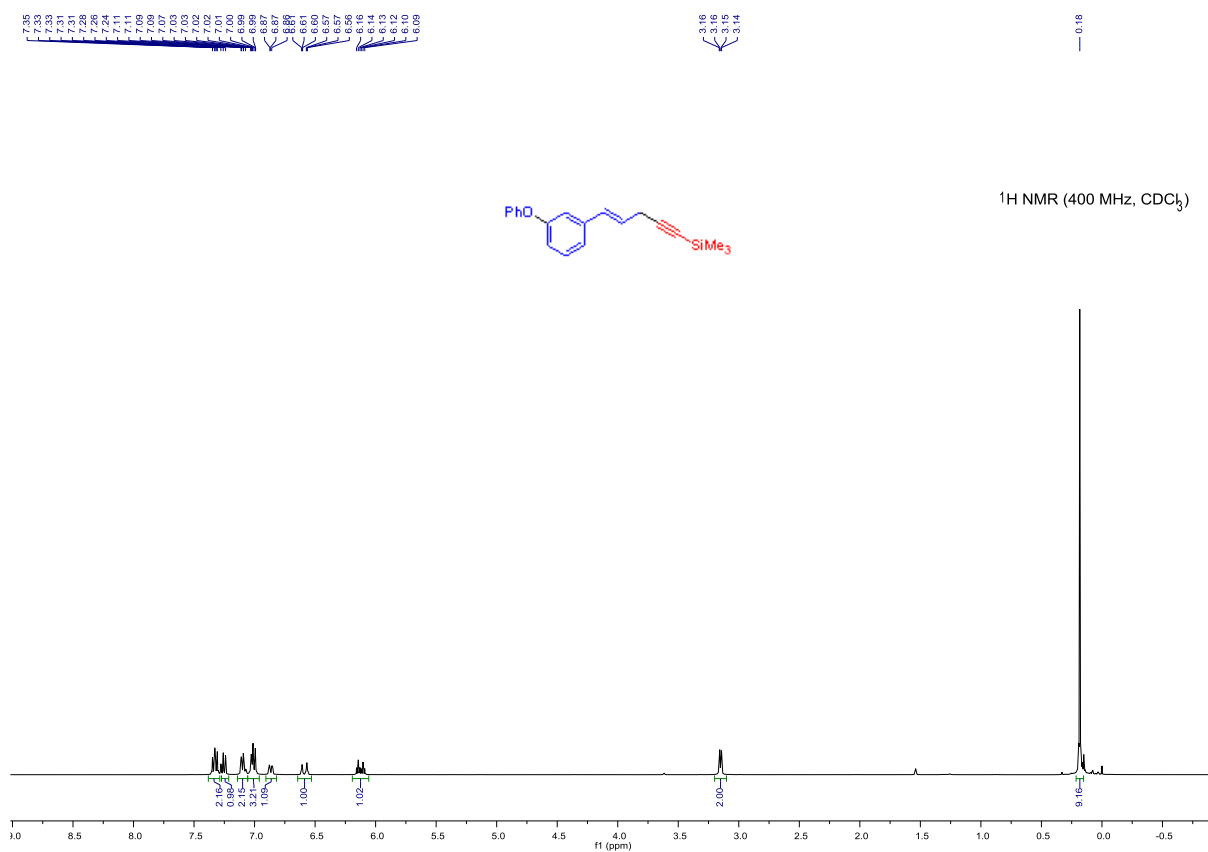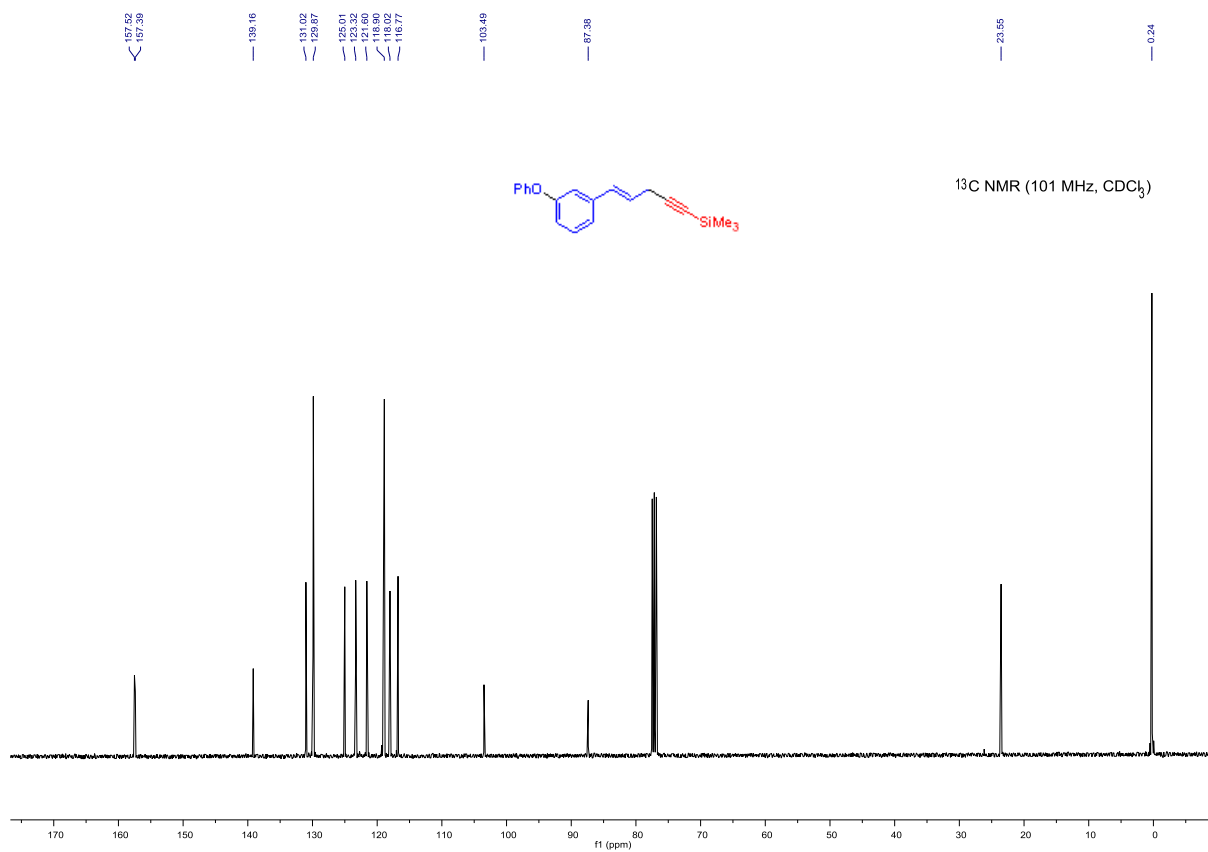

(10) (*E*)-1-fluoro-4-(5-phenylpent-1-en-4-yn-1-yl)benzene (**3fa**)

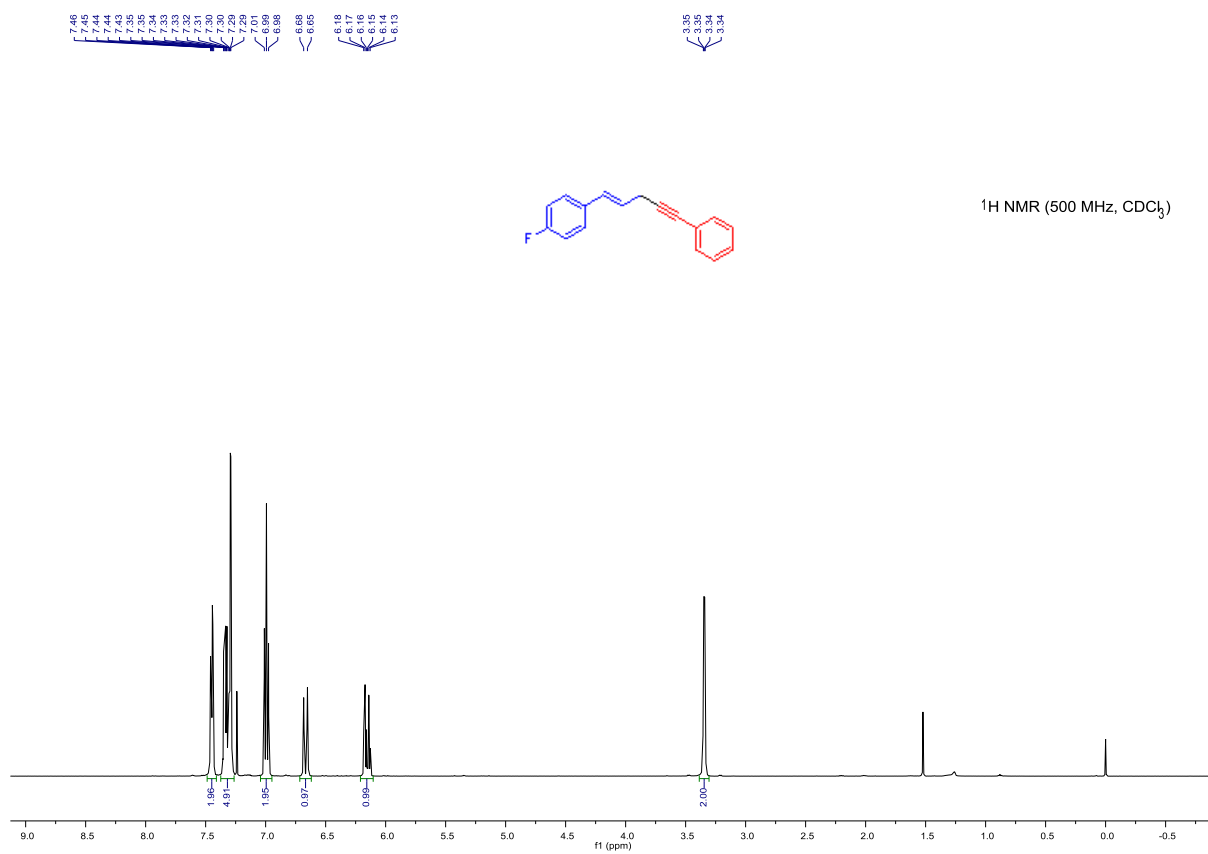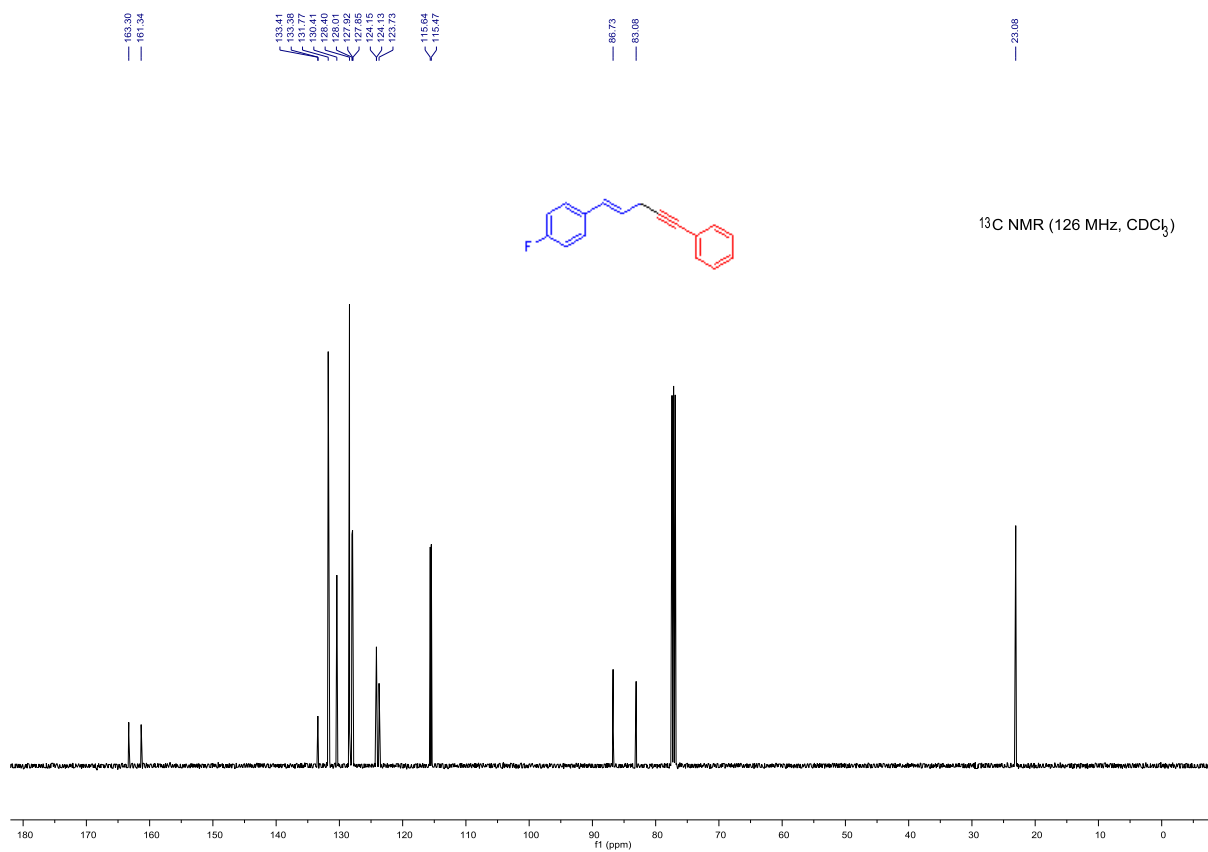

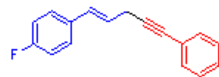

<sup>19</sup>F NMR (471 MHz, CDCl<sub>3</sub>)

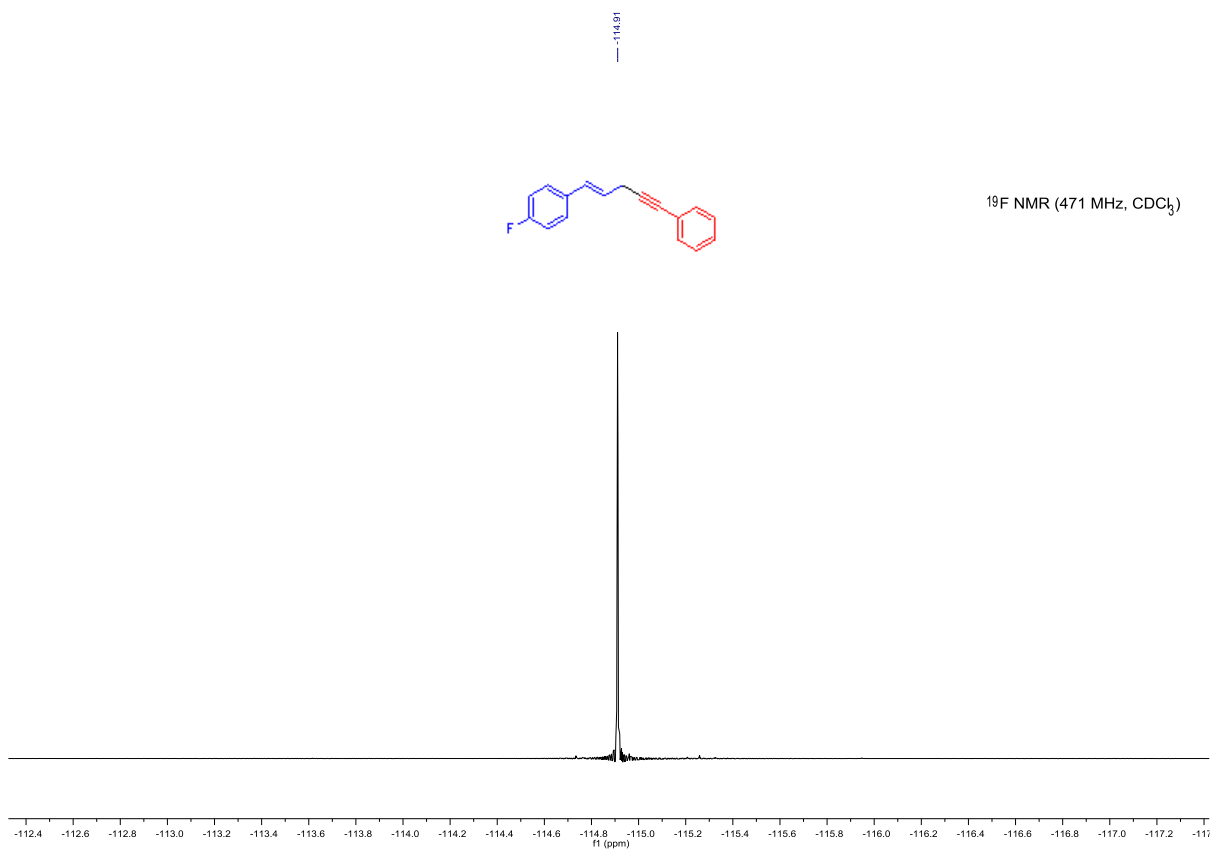



(11) (E)-5-(4-fluorophenyl)pent-4-en-1-yn-1-yl)trimethylsilane (**3fb**)

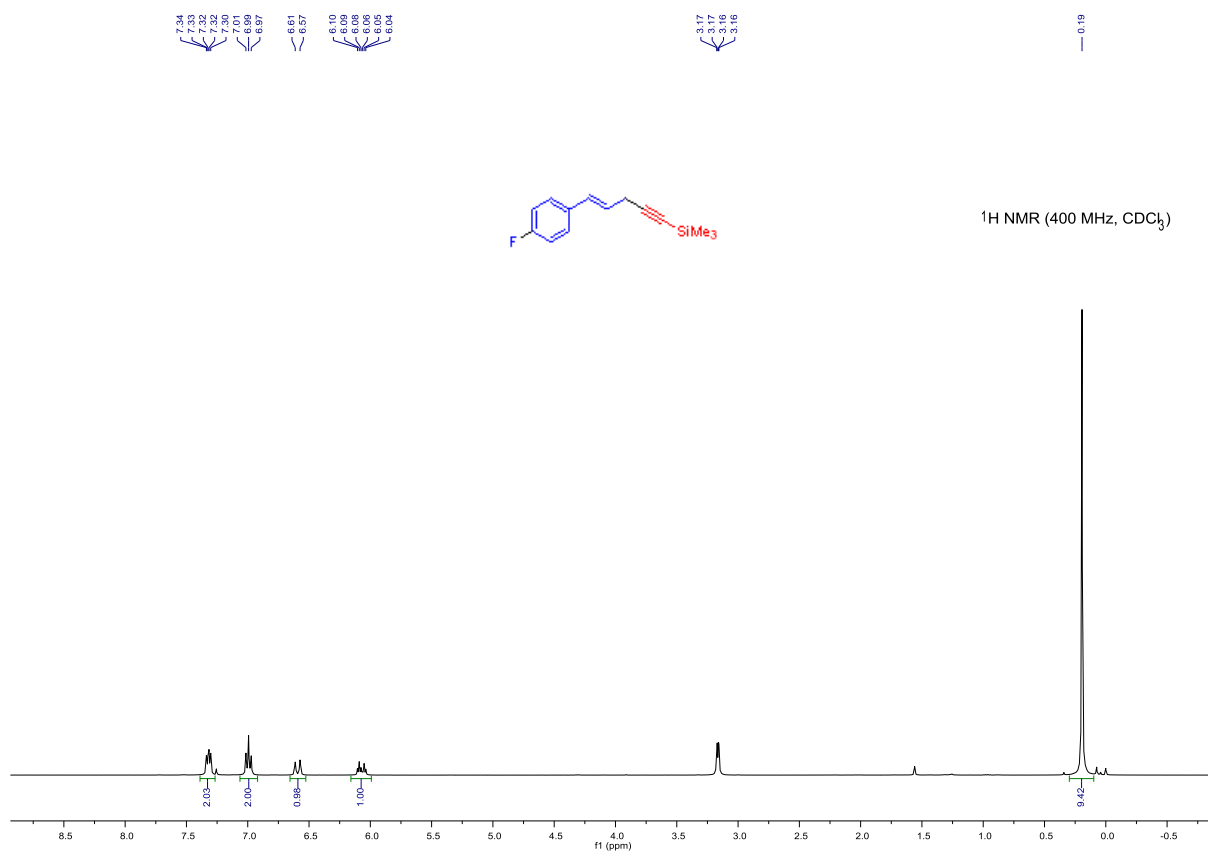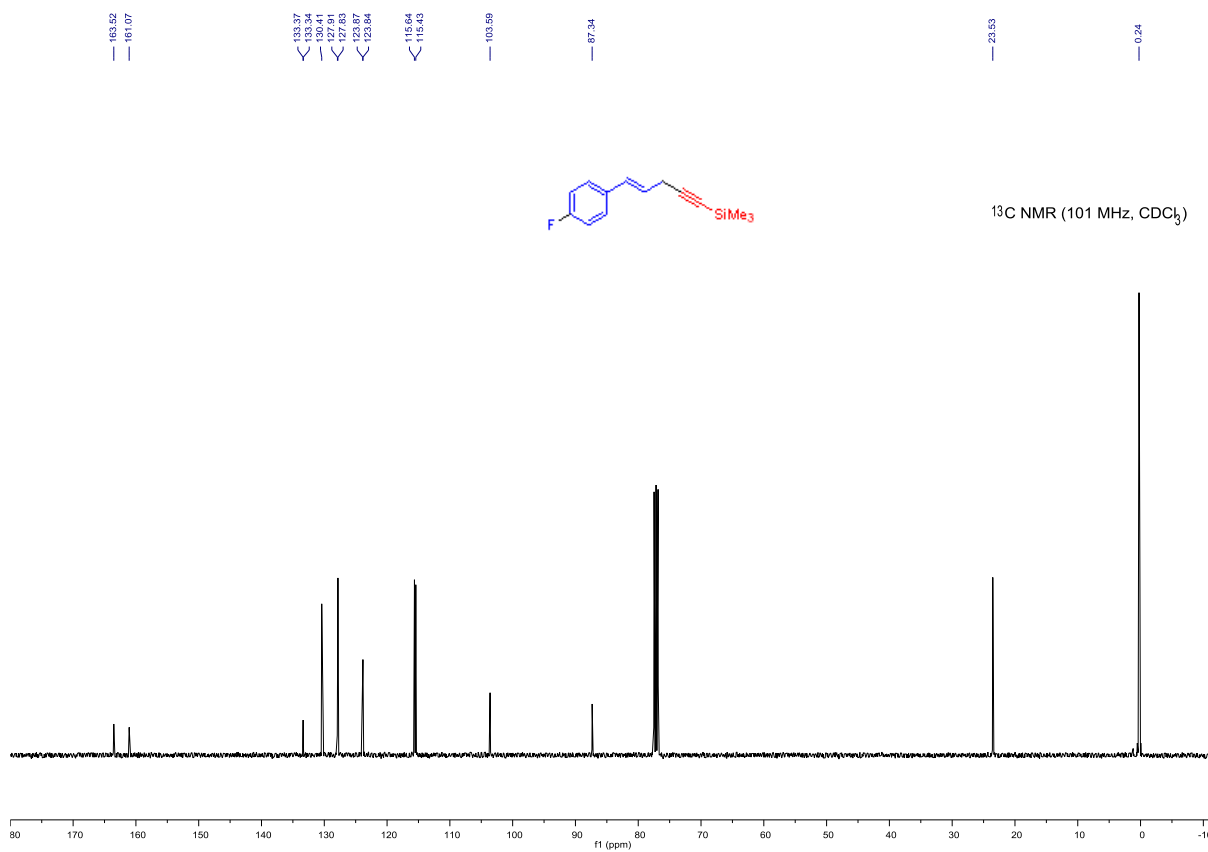

-114.92

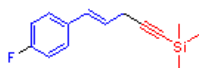

<sup>19</sup>F NMR (471 MHz, CDCl<sub>3</sub>)

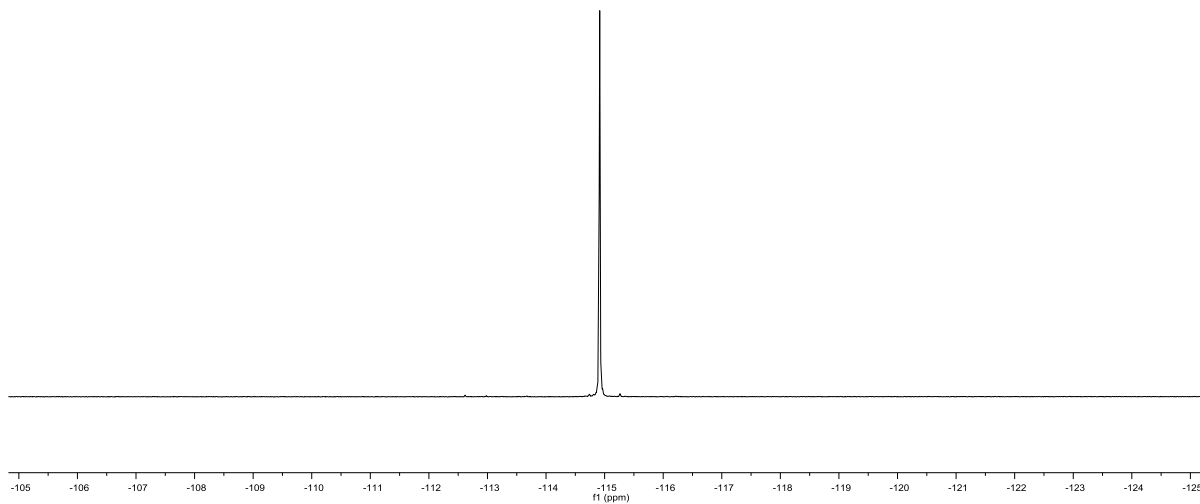

(12) (*E*)-1-chloro-4-(5-phenylpent-1-en-4-yn-1-yl)benzene (**3ga**)

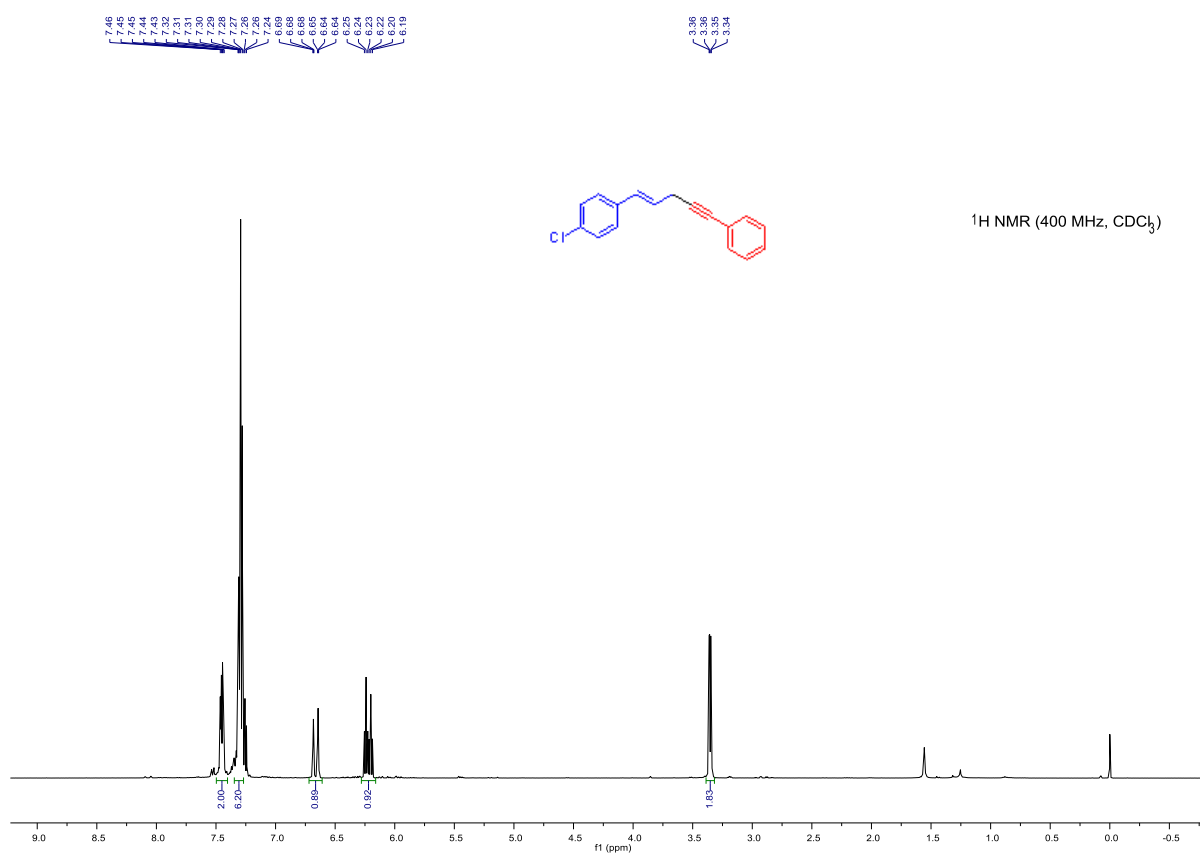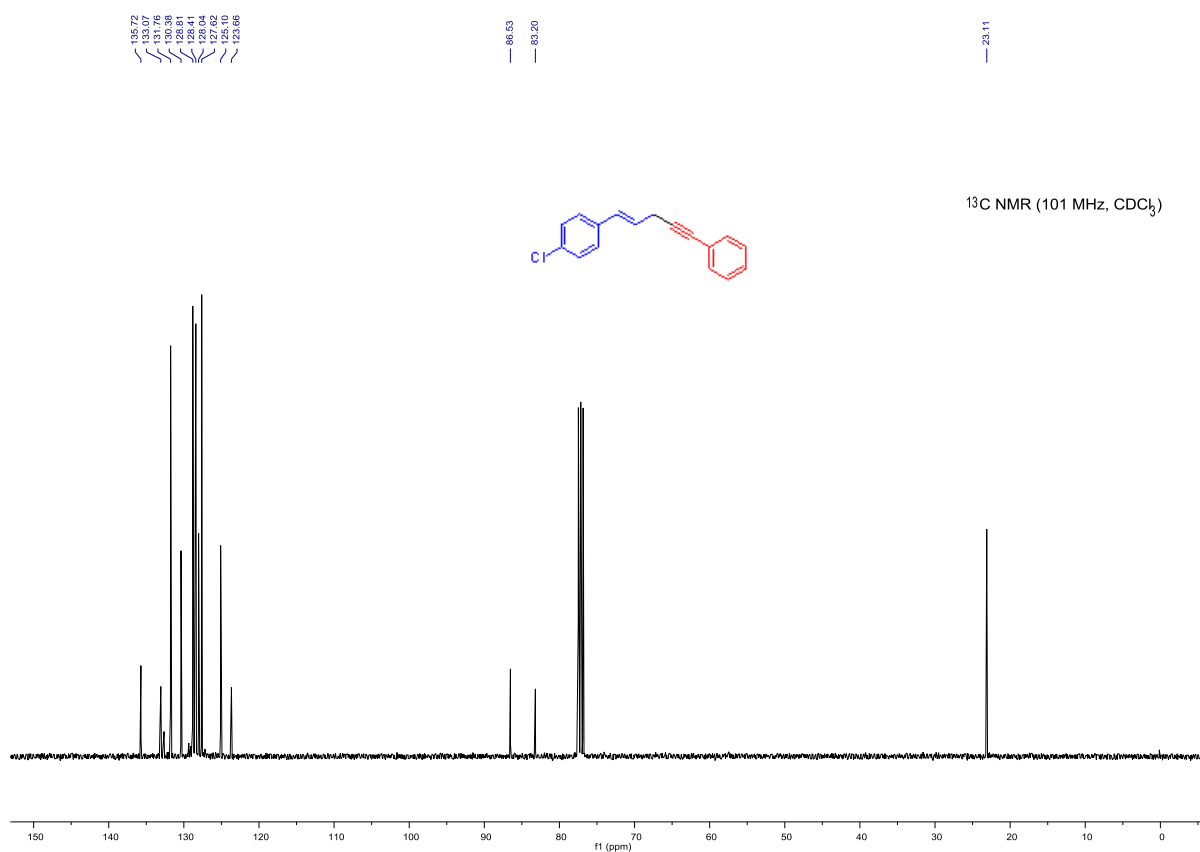

(13) (*E*)-(5-(4-chlorophenyl)pent-4-en-1-yn-1-yl)trimethylsilane (**3gb**)

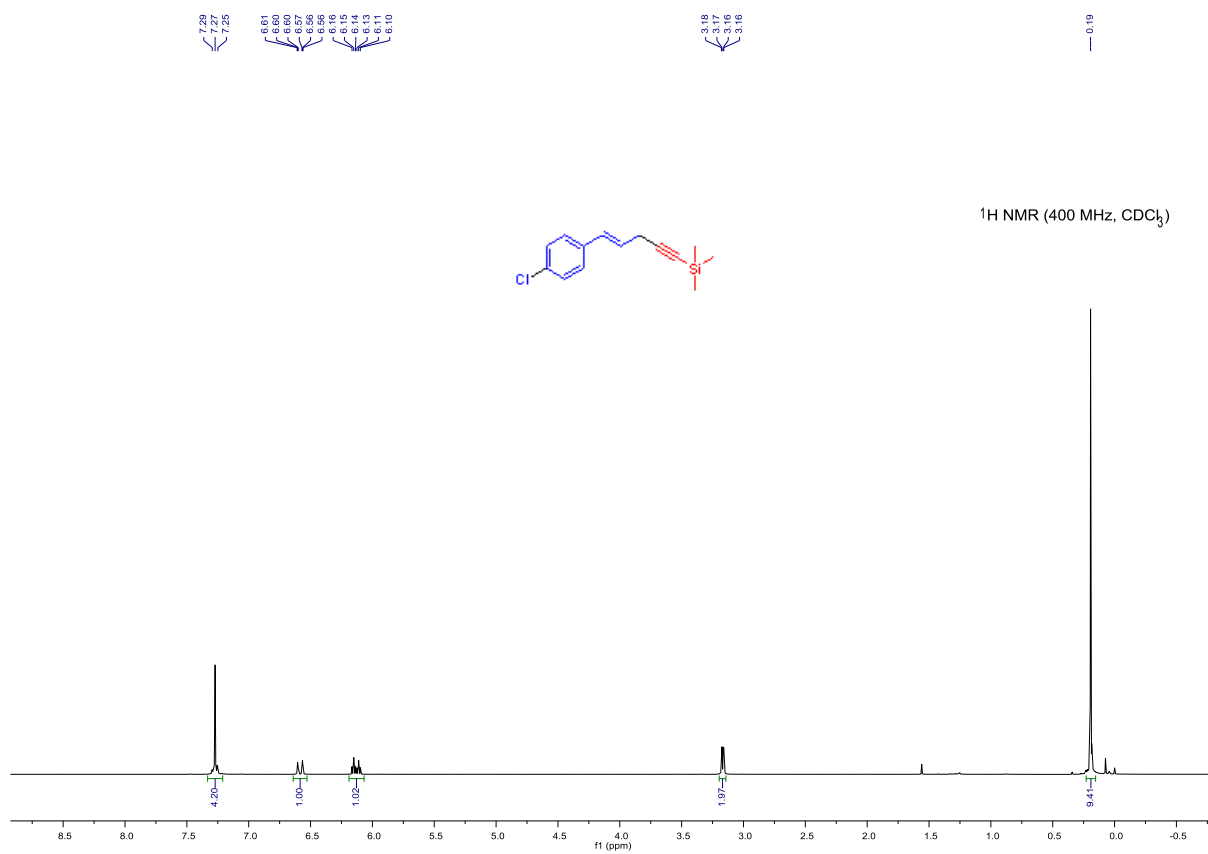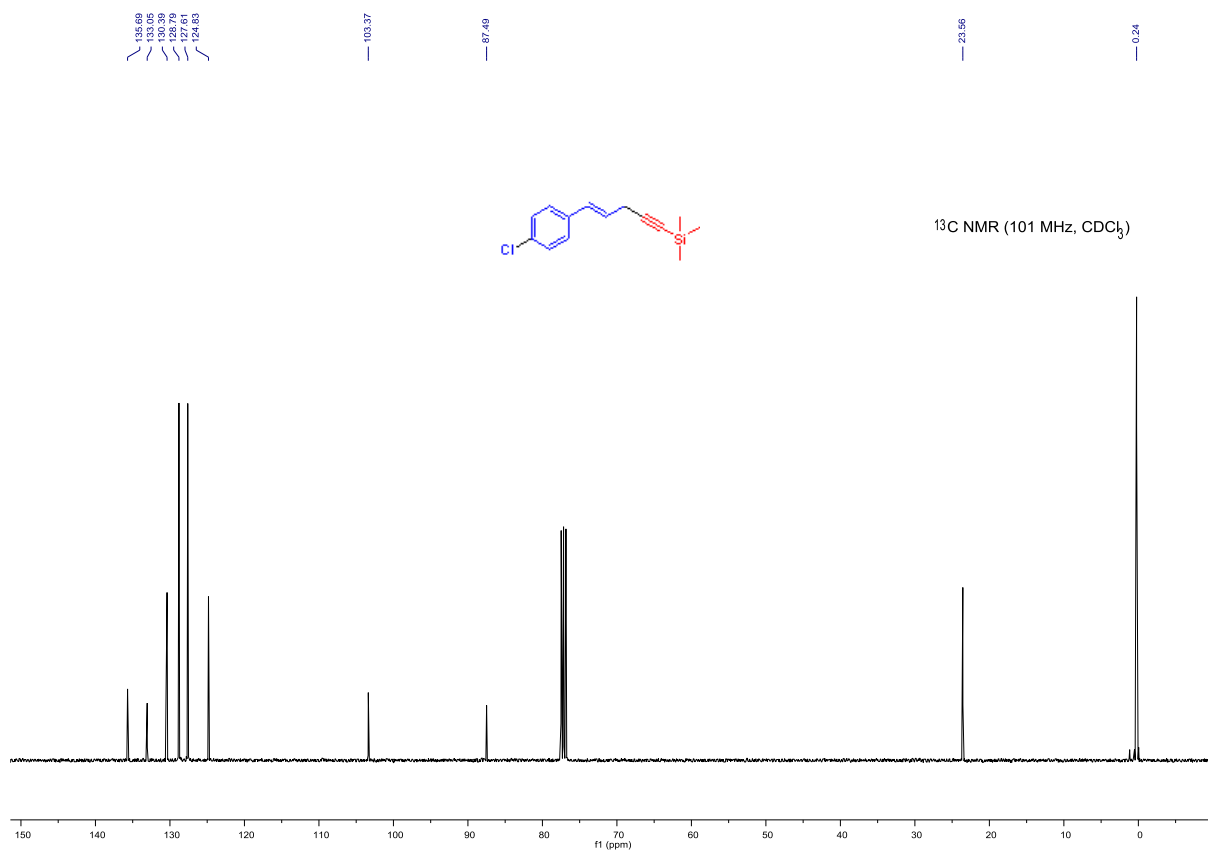

(14) (*E*)-1-(5-phenylpent-1-en-4-yn-1-yl)-4-(trifluoromethyl)benzene (**3ha**)

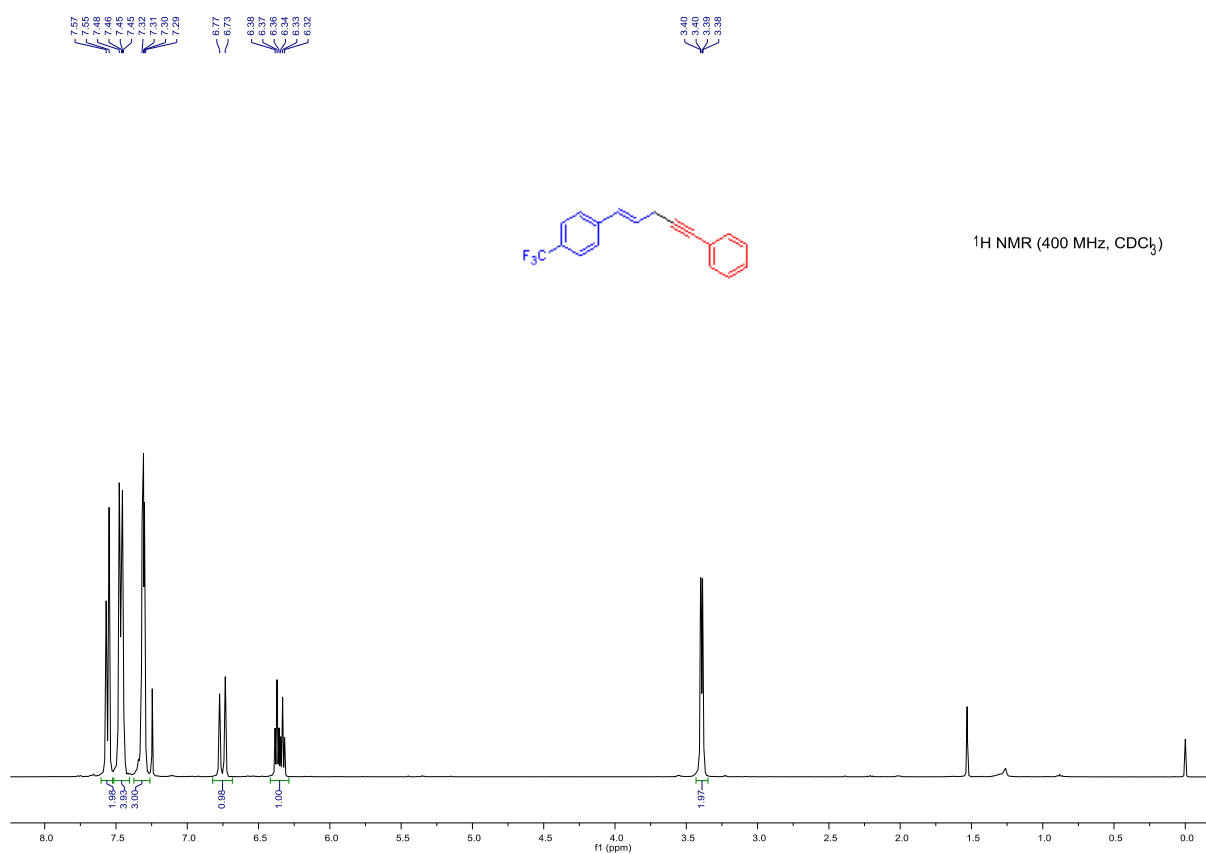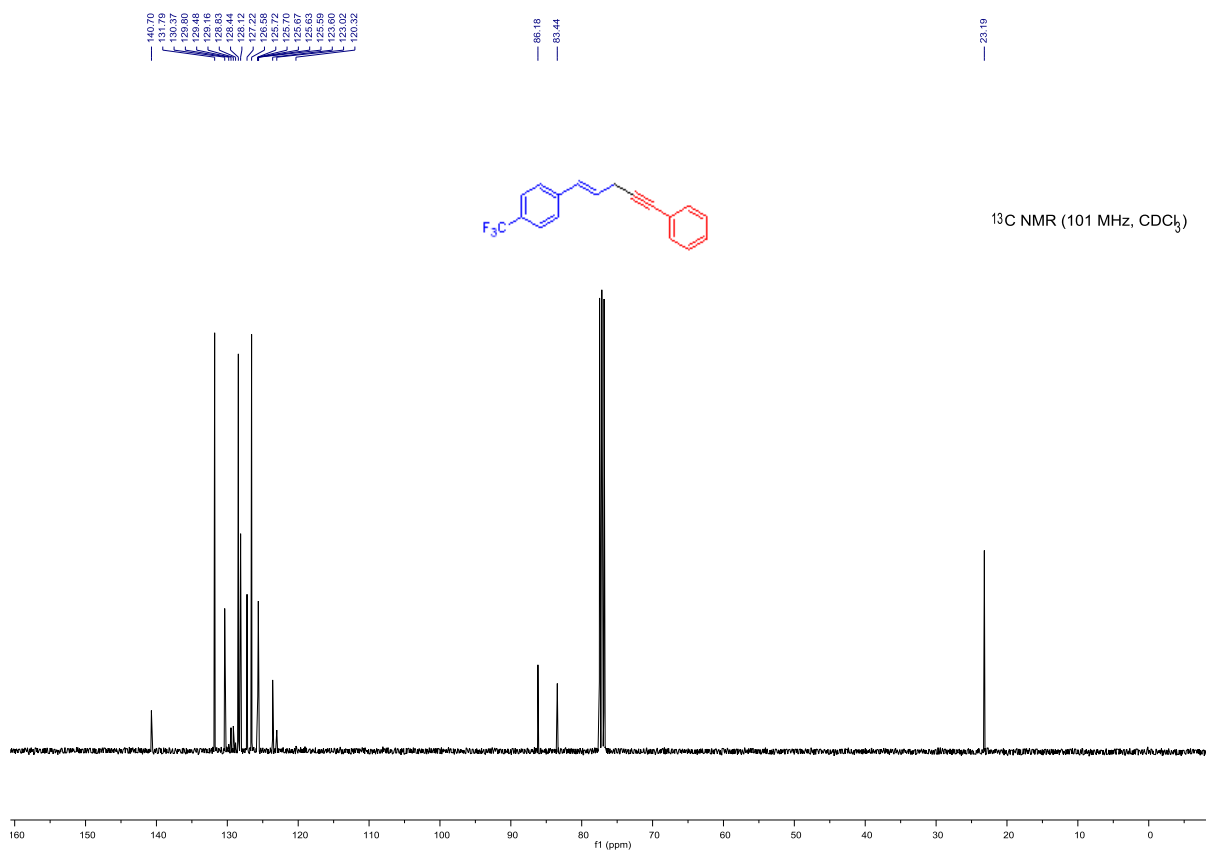

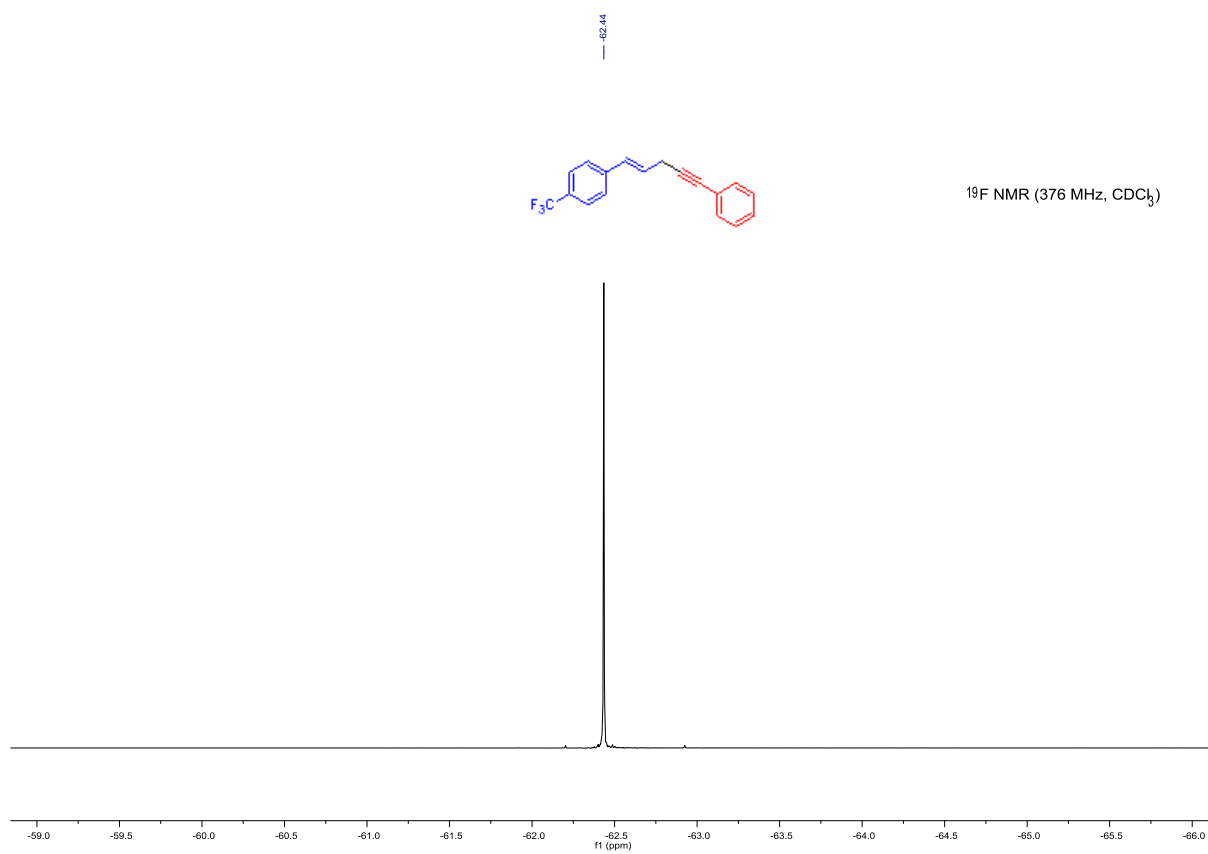

(15) (*E*)-trimethyl(5-(4-(trifluoromethyl)phenyl)pent-4-en-1-yn-1-yl)silane (**3hb**)

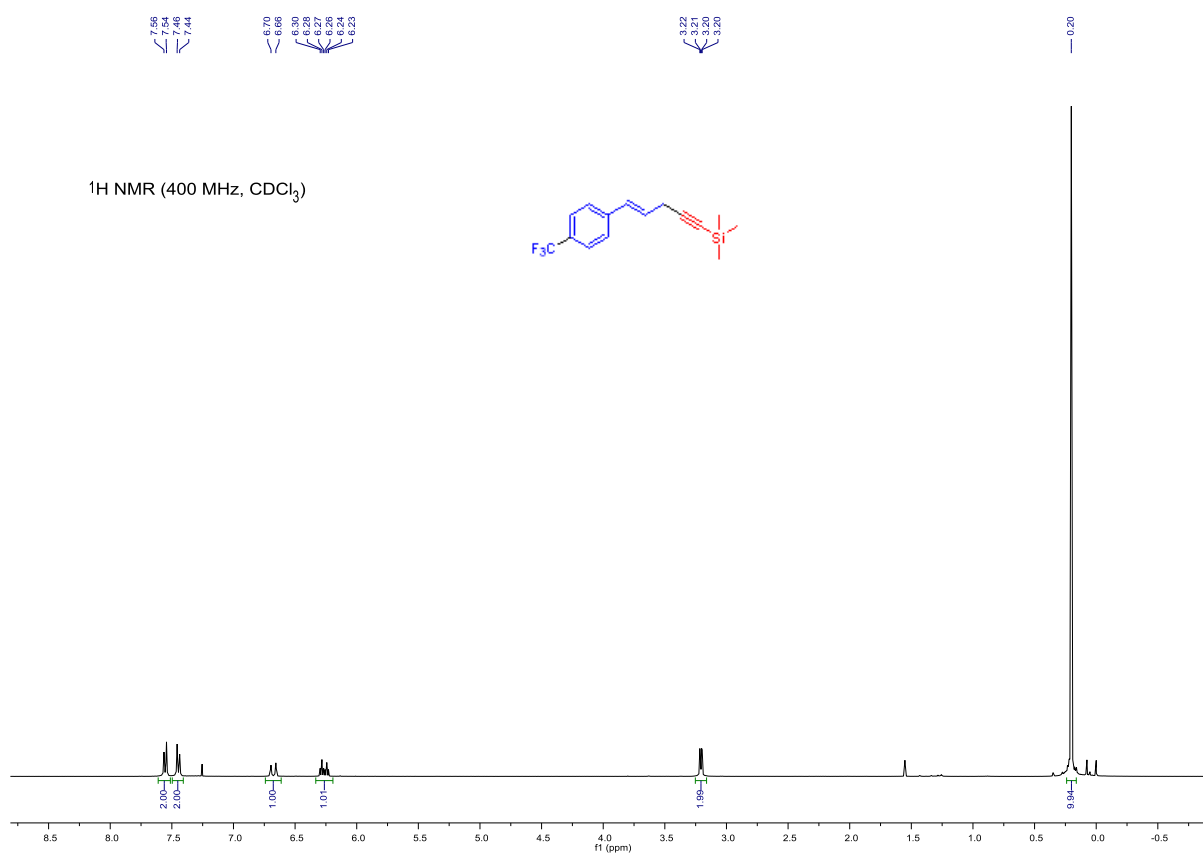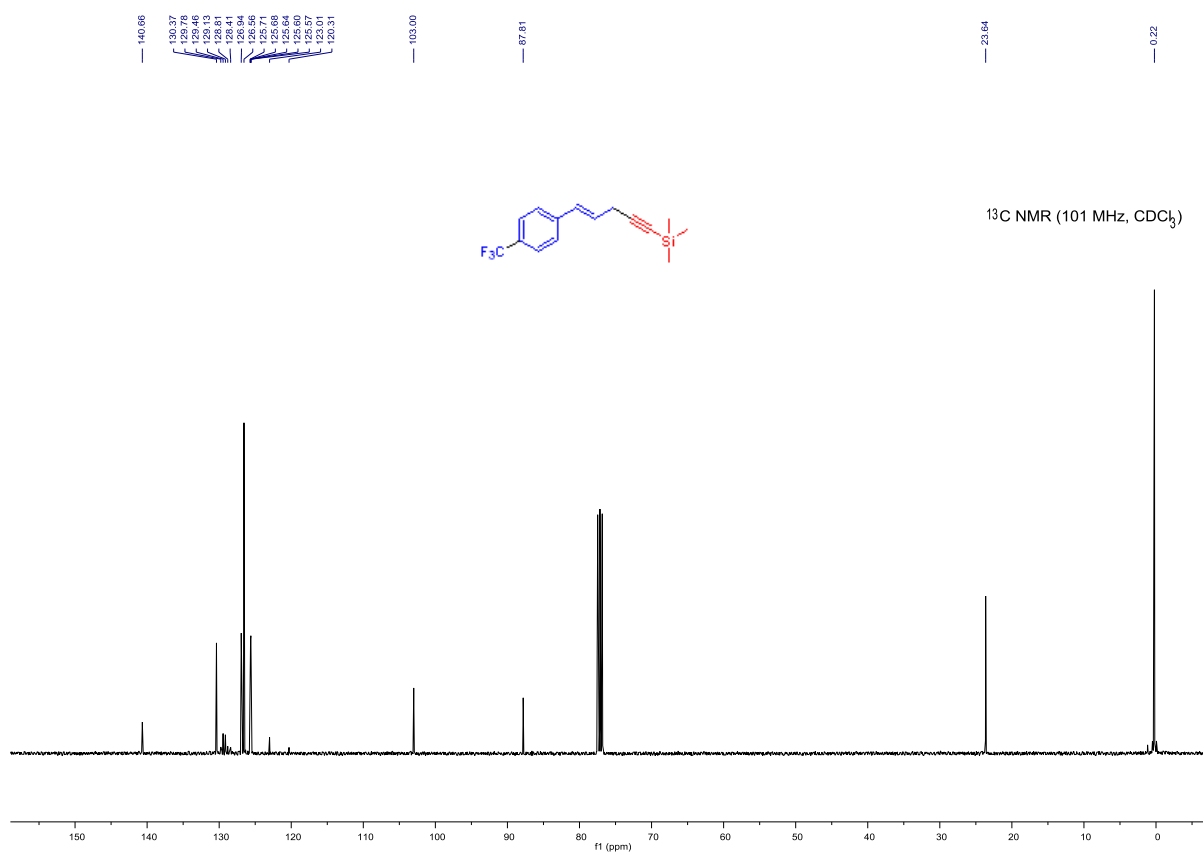

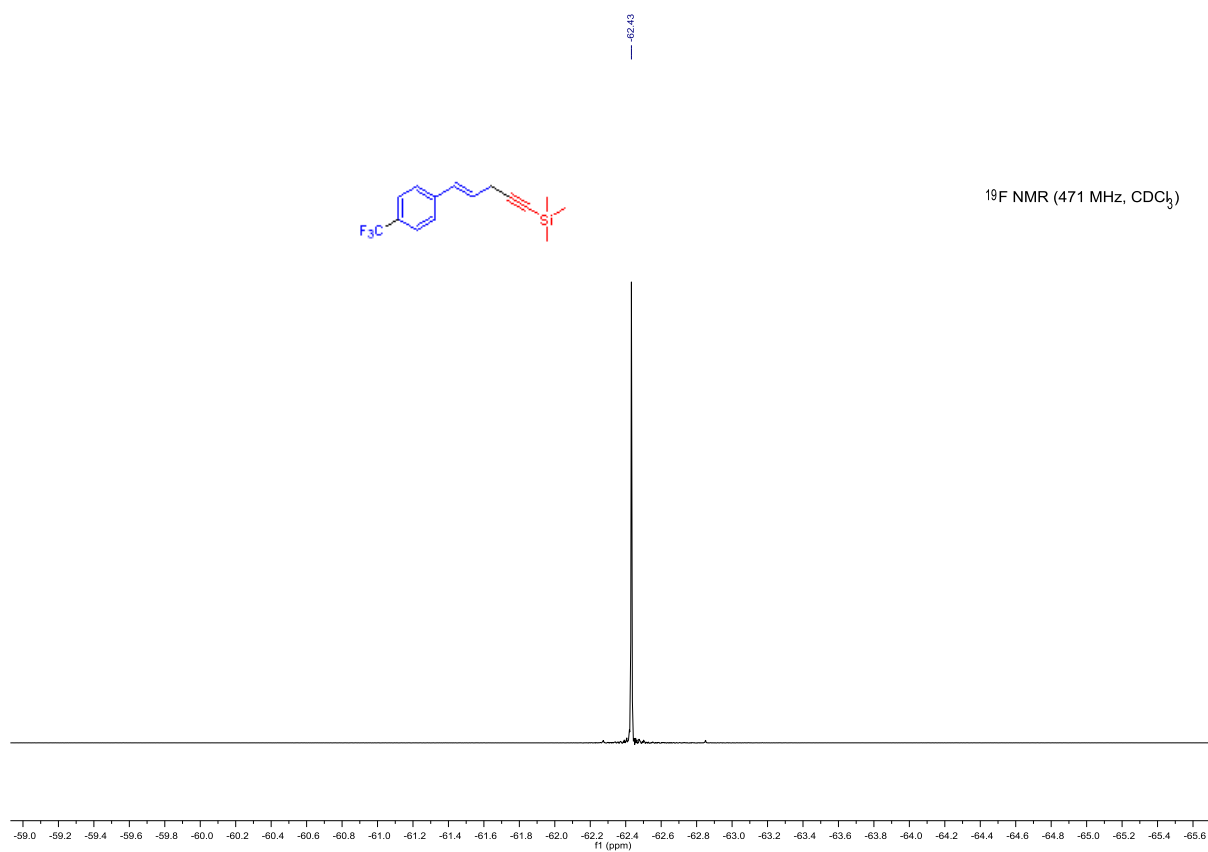



(16) ethyl (*E*)-4-(5-(trimethylsilyl)pent-1-en-4-yn-1-yl)benzoate (**3i**)

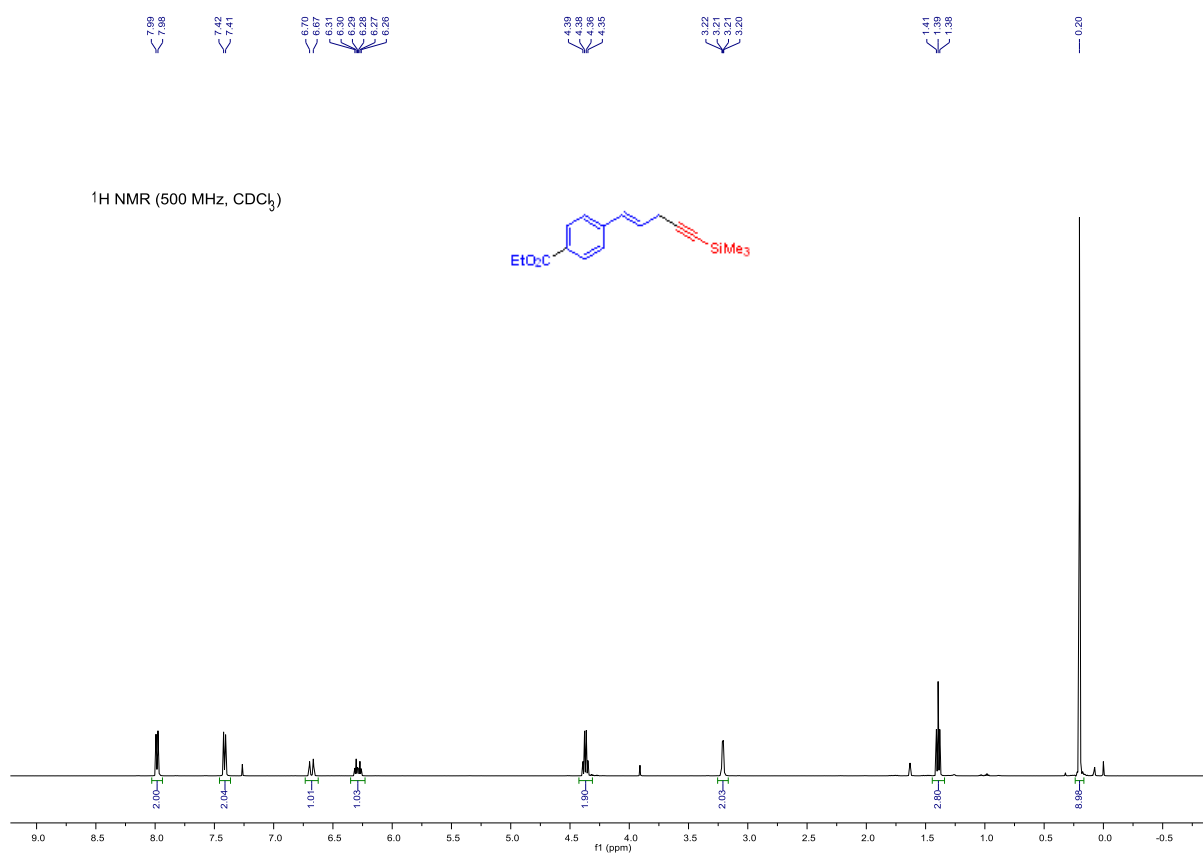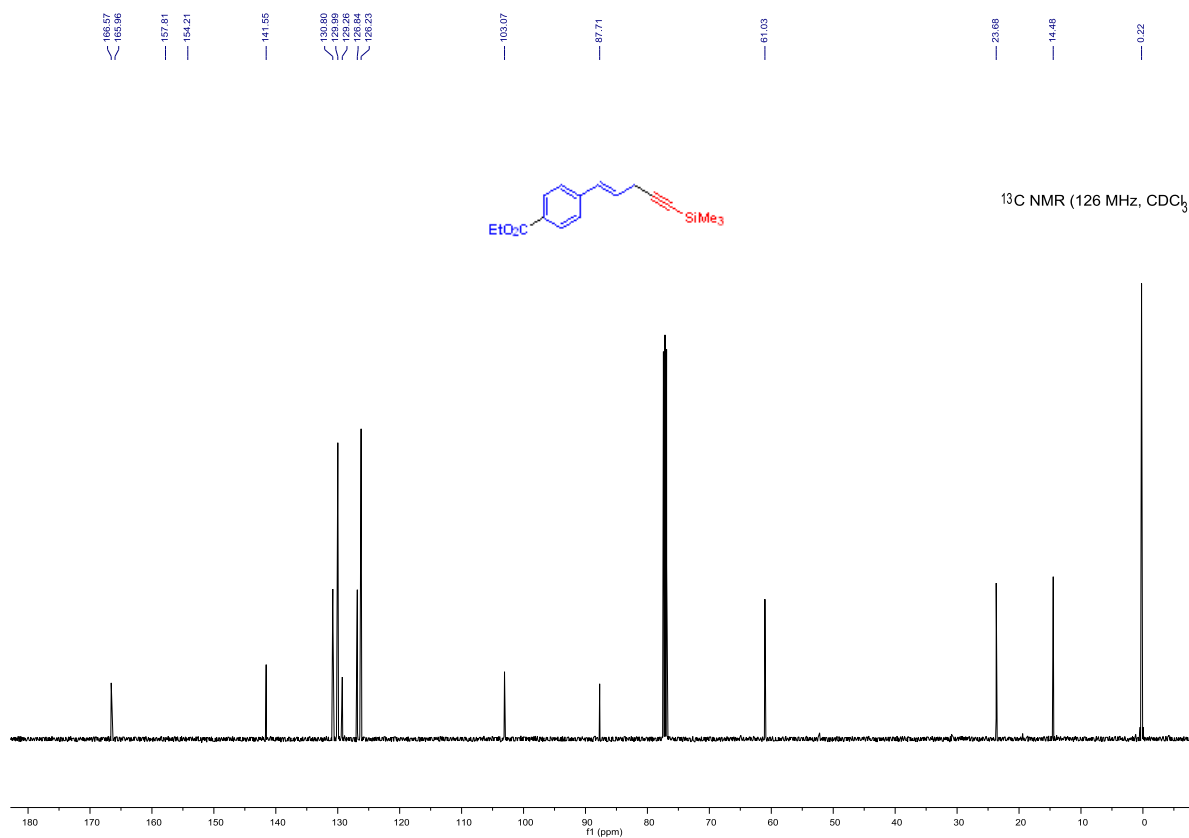

(17) (*E*)-*N,N*-diethyl-4-(5-(trimethylsilyl)pent-1-en-4-yn-1-yl)benzamide (**3j**)

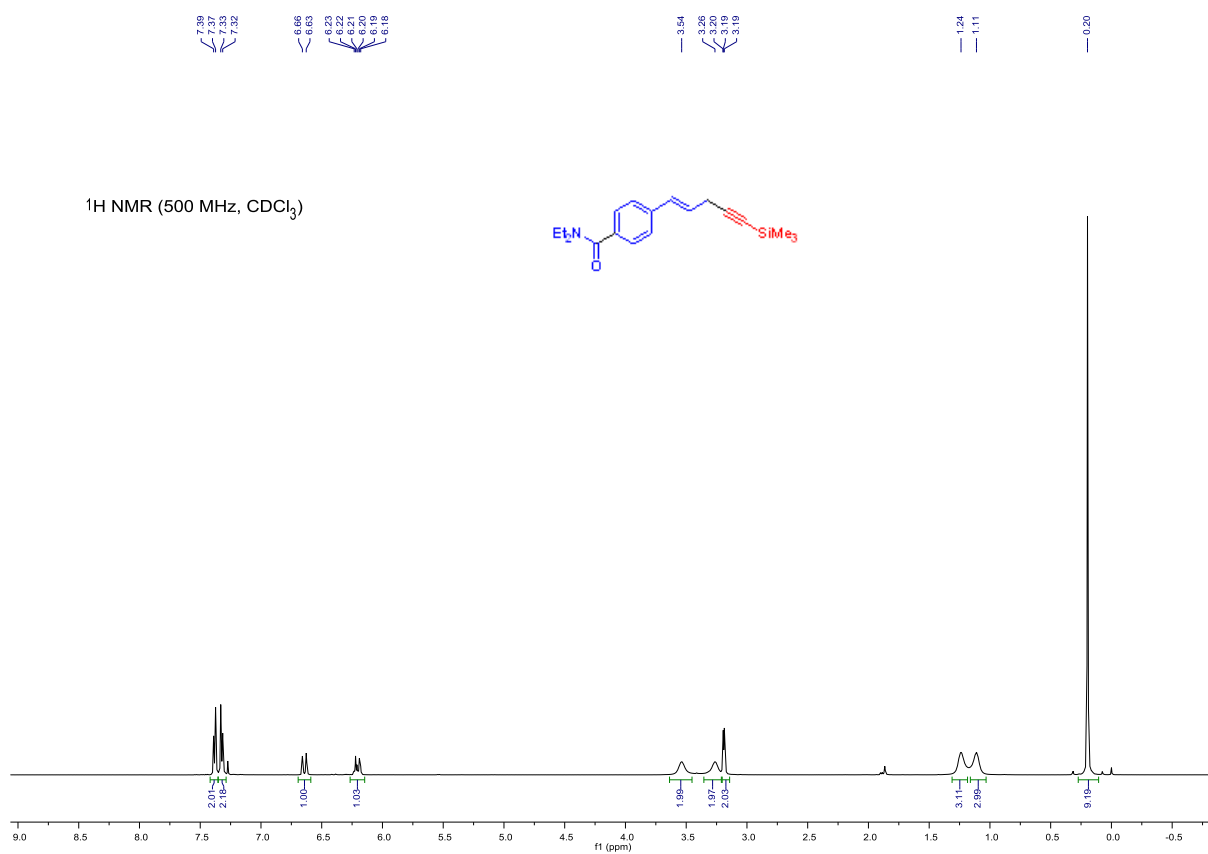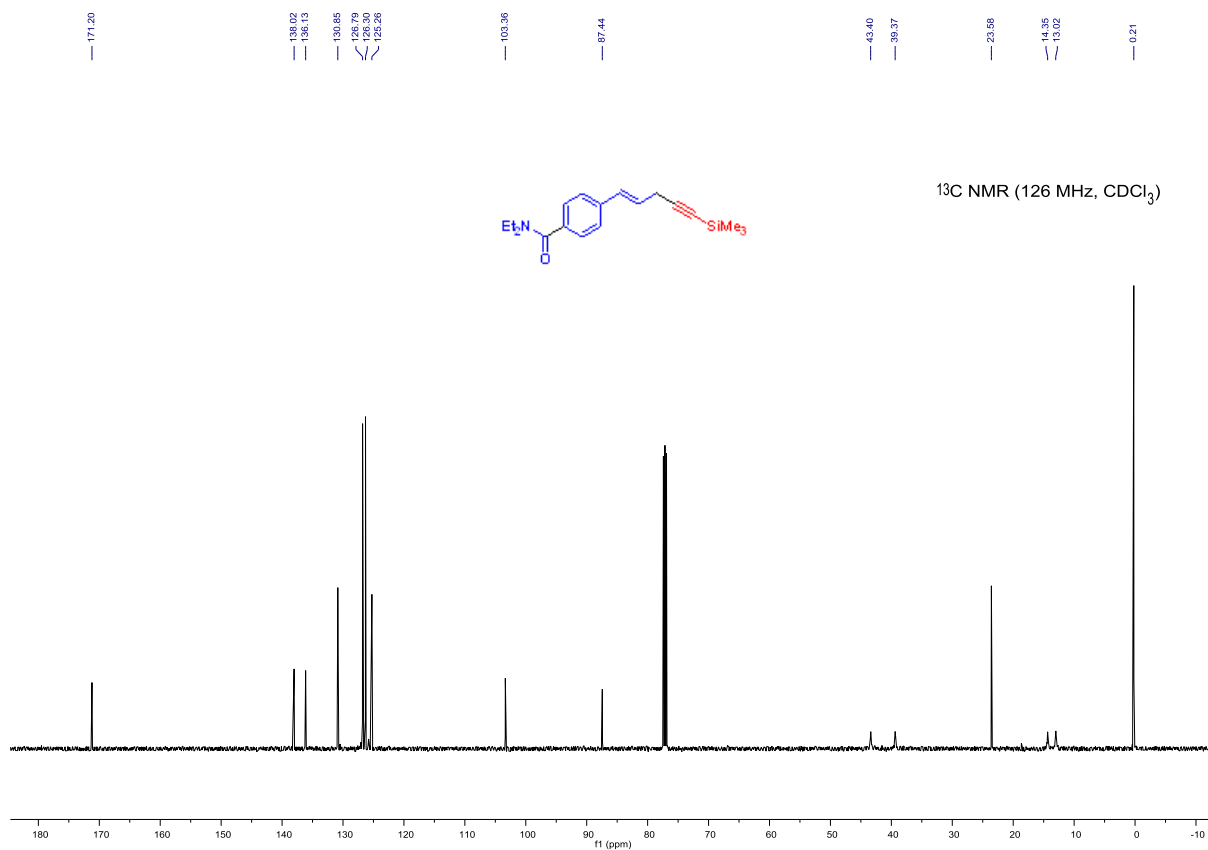

(18) (*E*)-trimethyl(5-((trimethylsilyl)ethynyl)phenyl)pent-4-en-1-yn-1-yl)silane (**3k**)

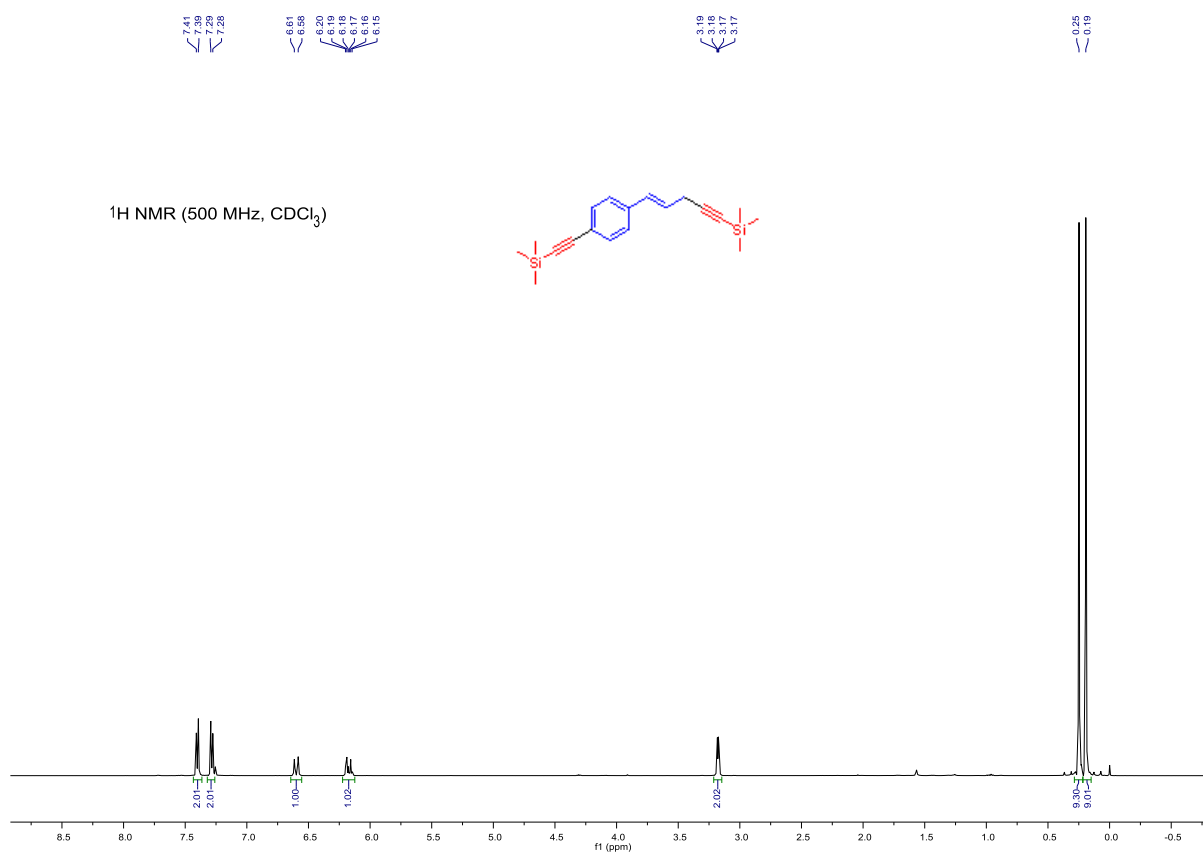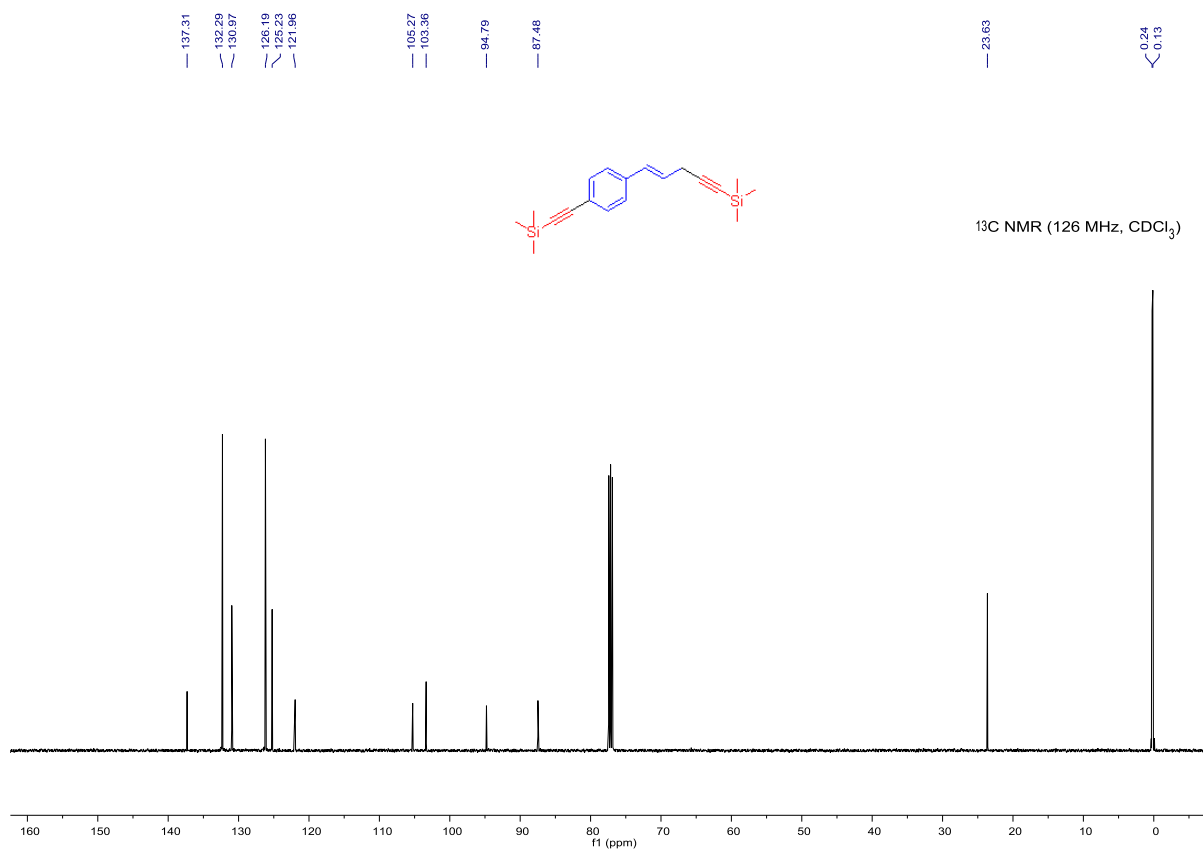

(19) *(E)*-trimethyl(5-(2-((trimethylsilyl)ethynyl)phenyl)pent-4-en-1-yn-1-yl)silane (**31**)

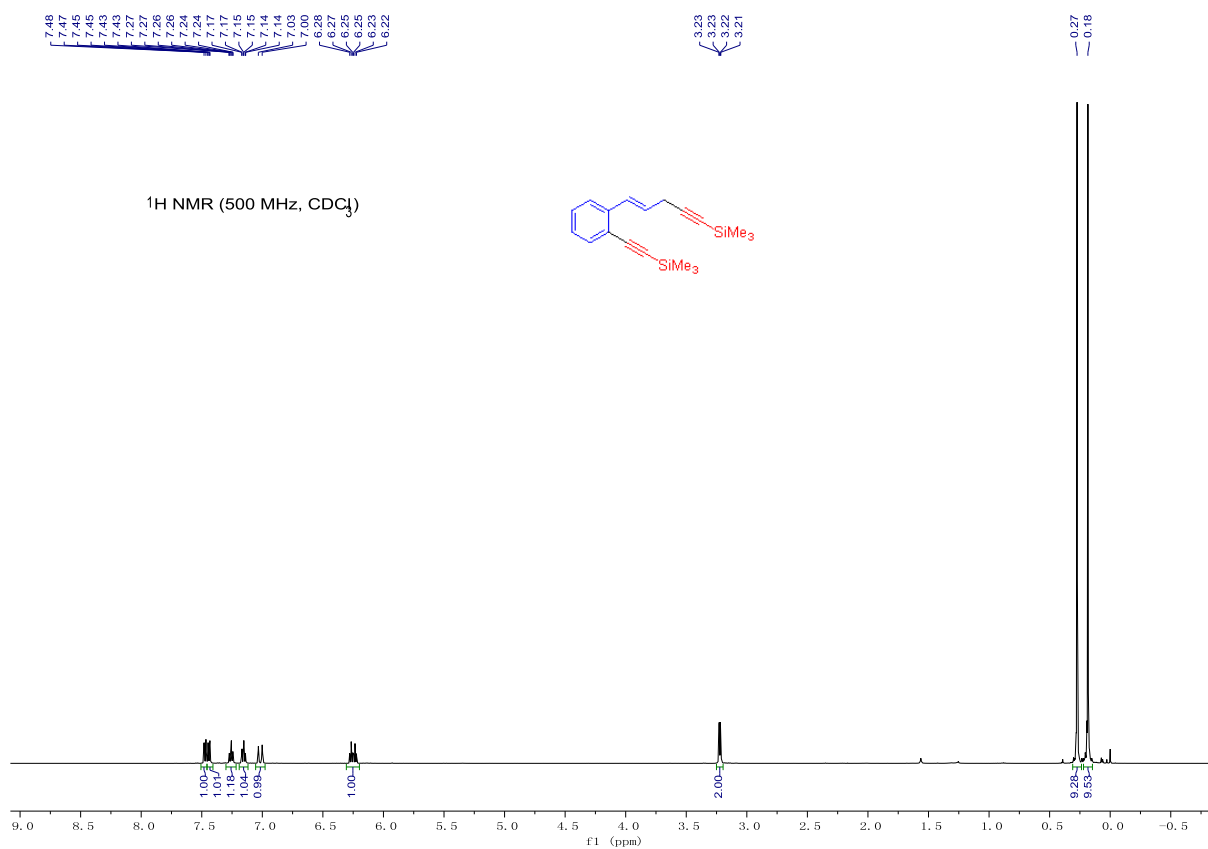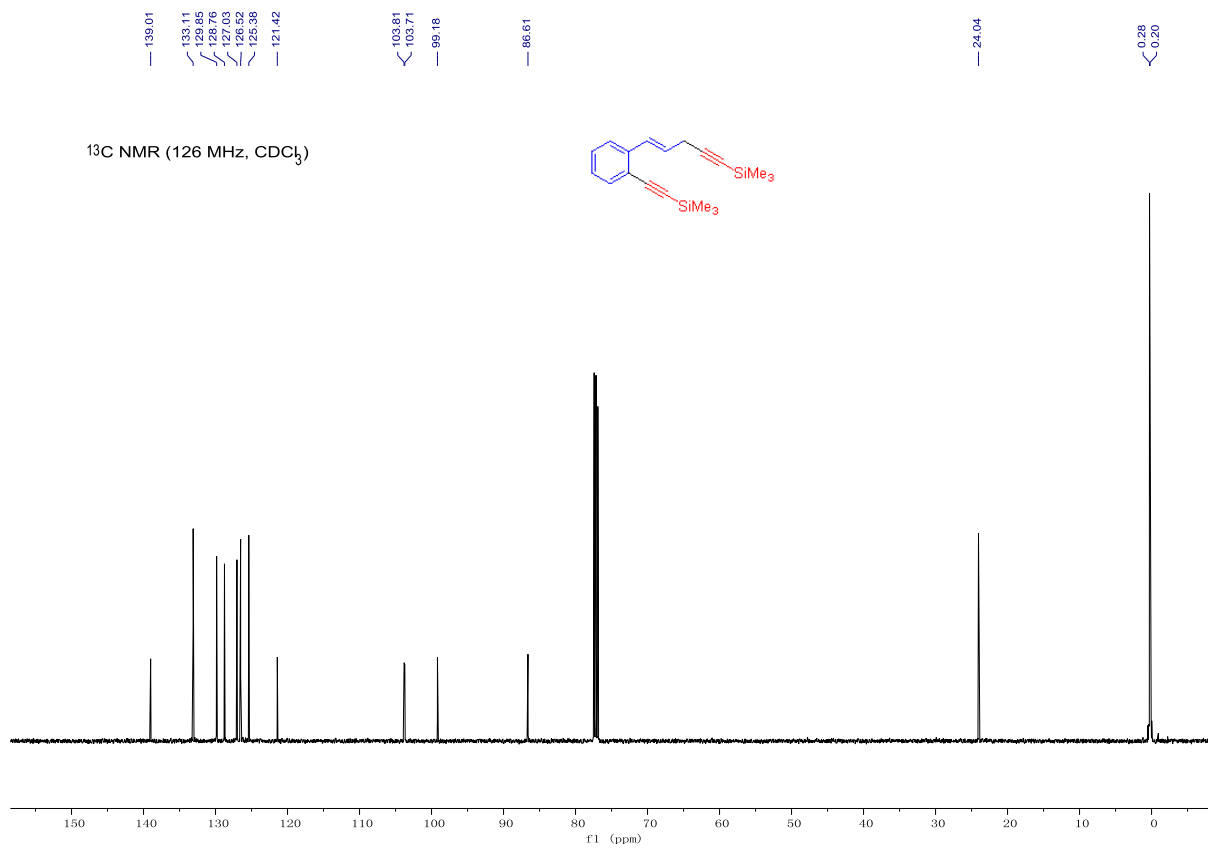

(20) (*E*)-2-(5-phenylpent-1-en-4-yn-1-yl)-1,1'-biphenyl (**3ma**)

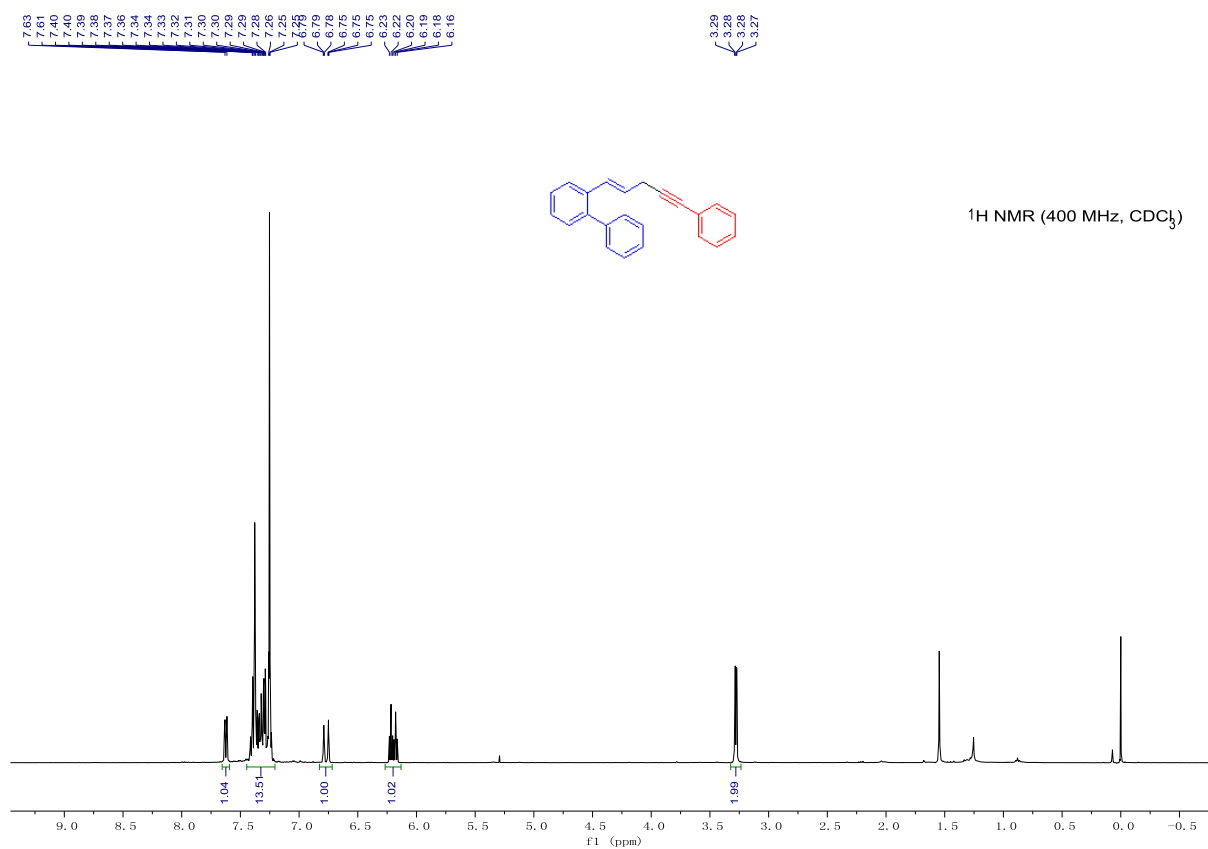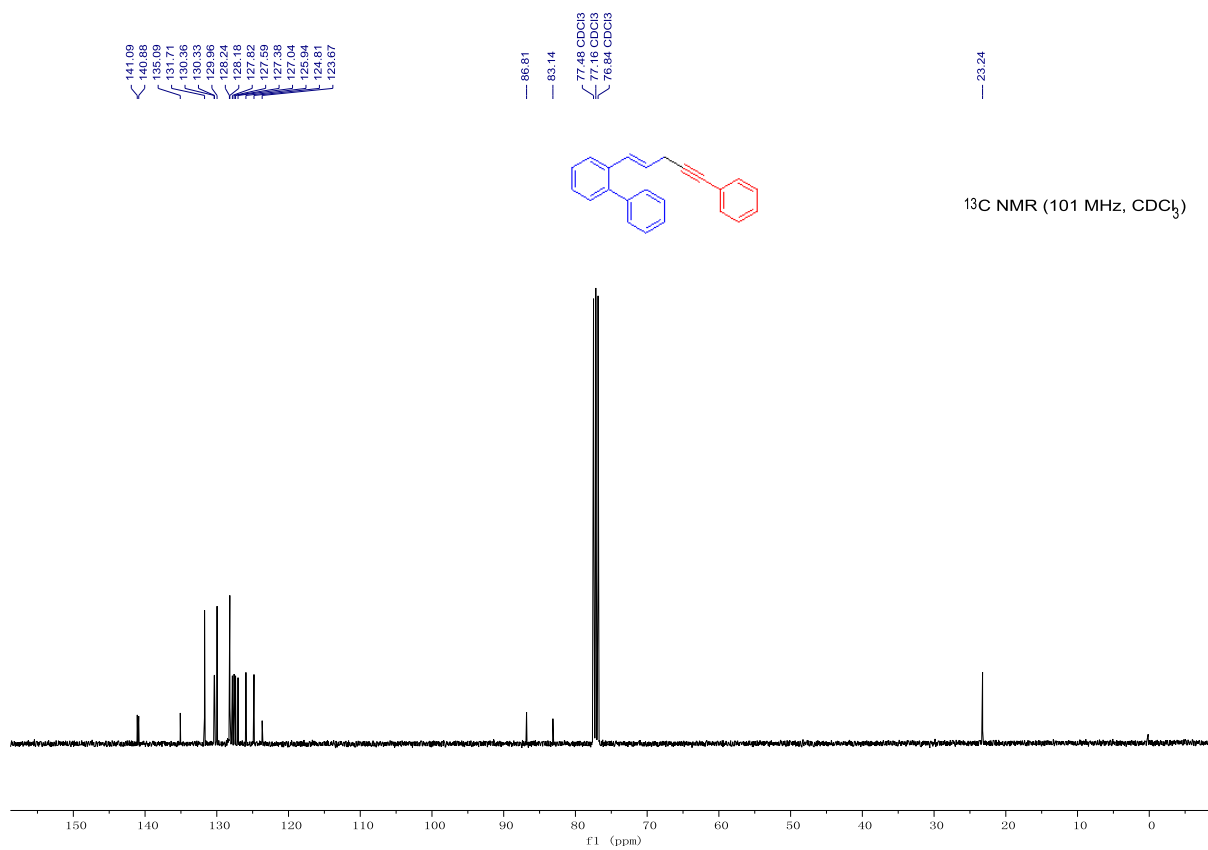

(21) (*E*)-(5-([1,1'-biphenyl]-2-yl)pent-4-en-1-yn-1-yl)trimethylsilane (**3mb**)

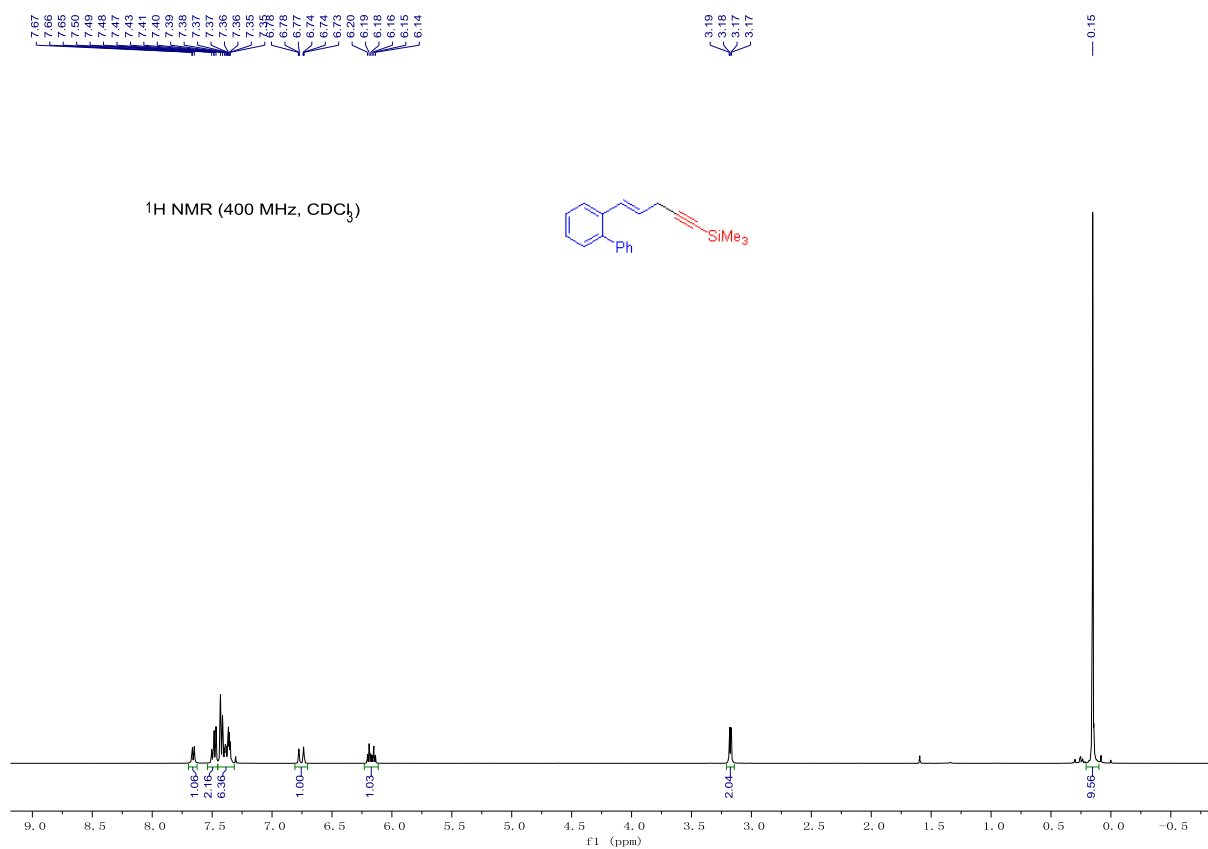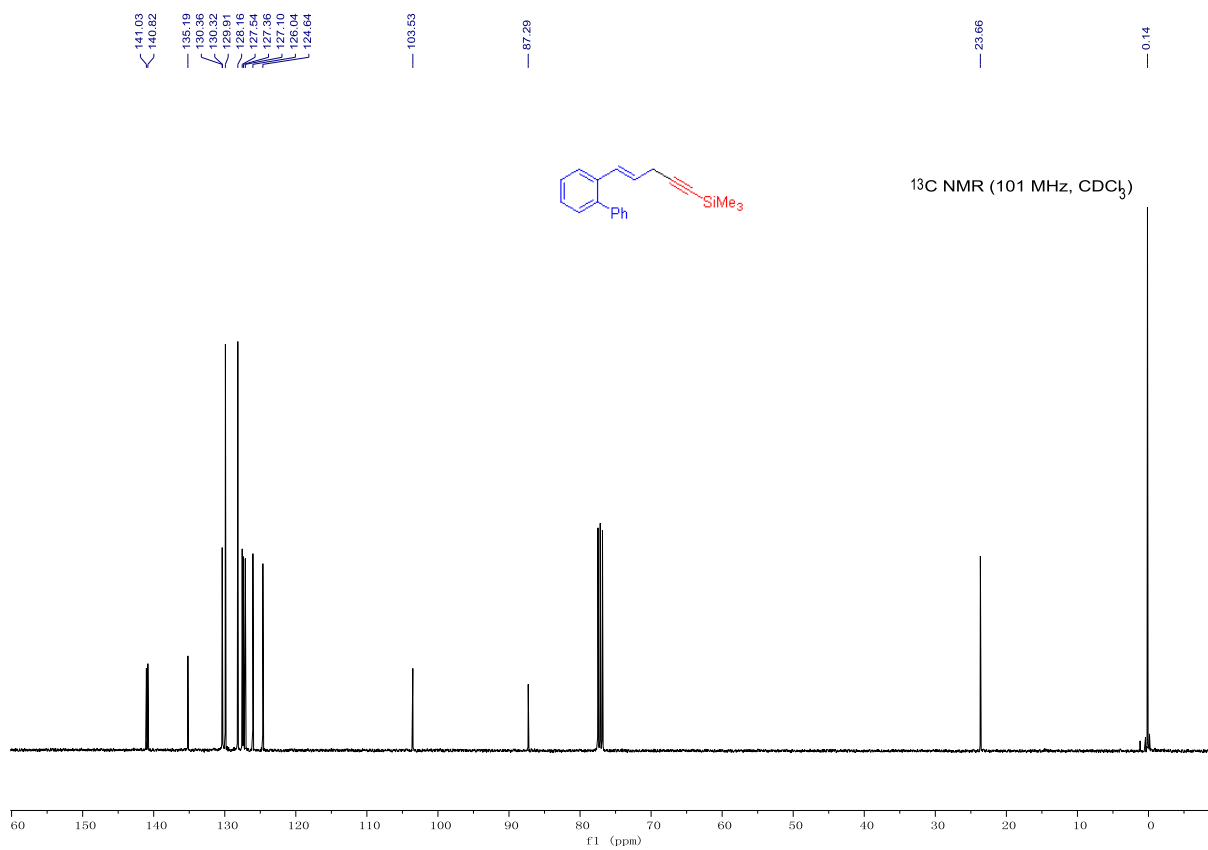

(22) (E)-1-(5-phenylpent-1-en-4-yn-1-yl)naphthalene (**3na**)

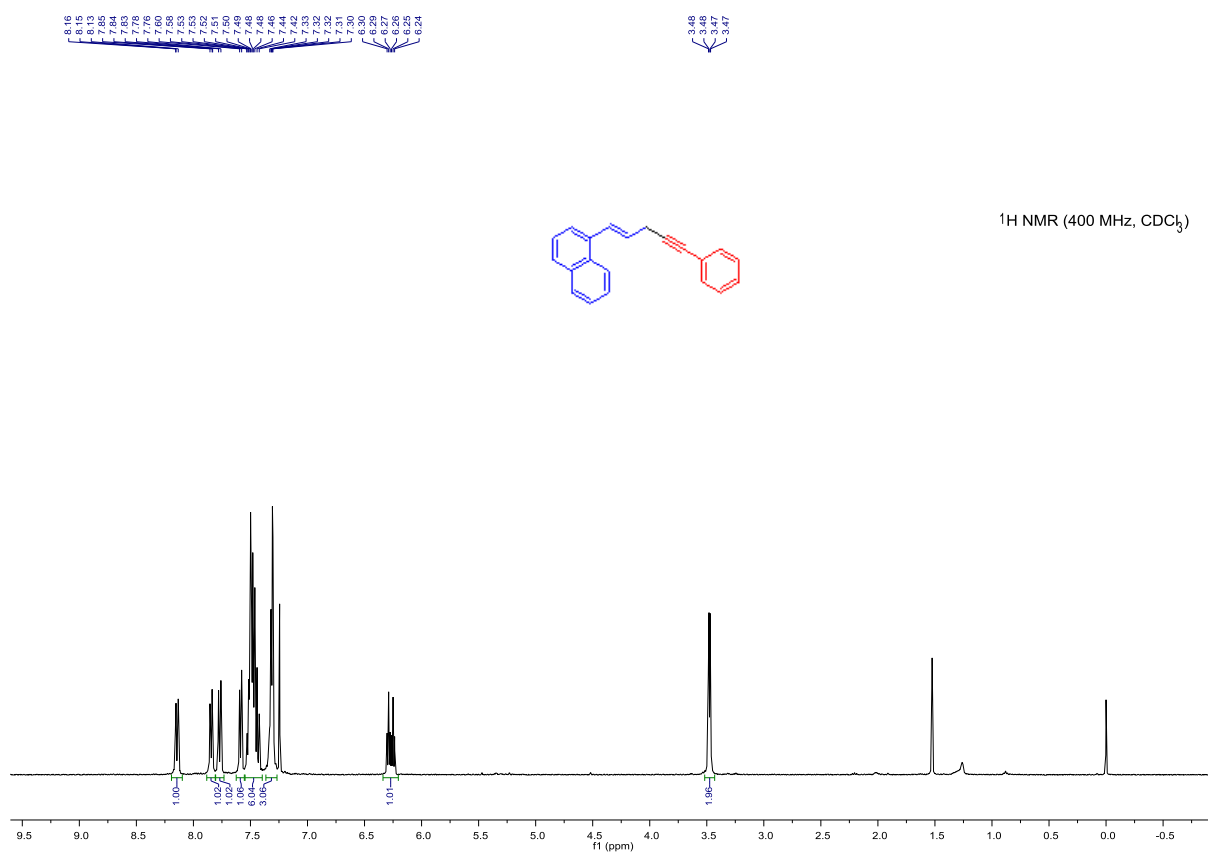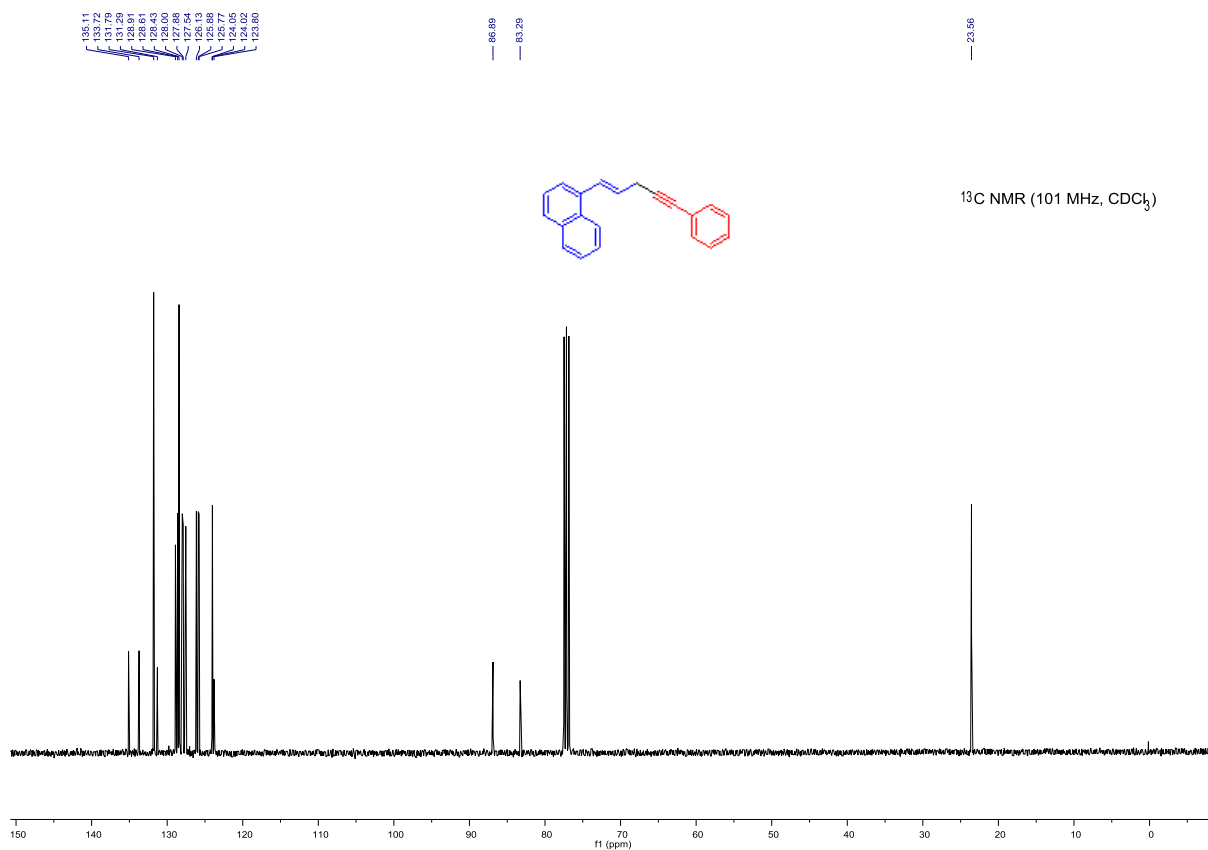

(23) (*E*)-trimethyl(5-(naphthalen-1-yl)pent-4-en-1-yn-1-yl)silane (**3nb**)

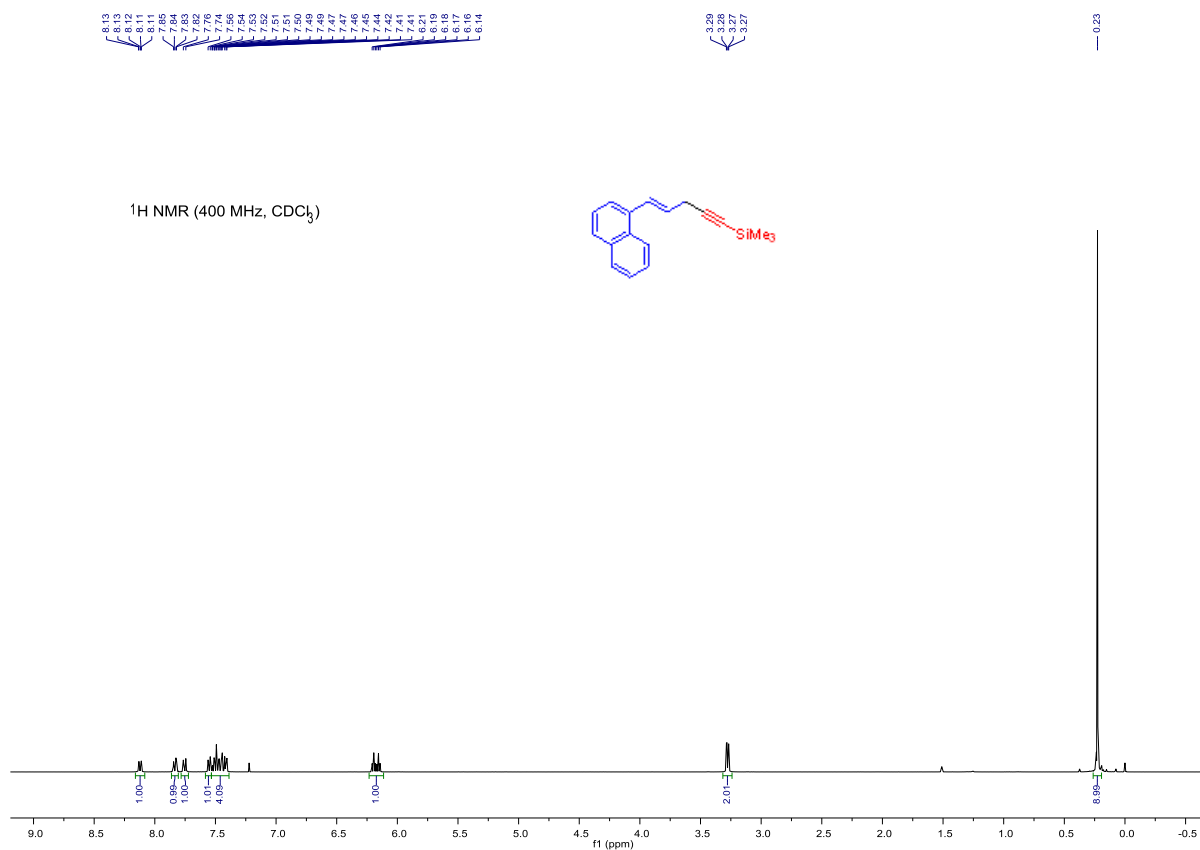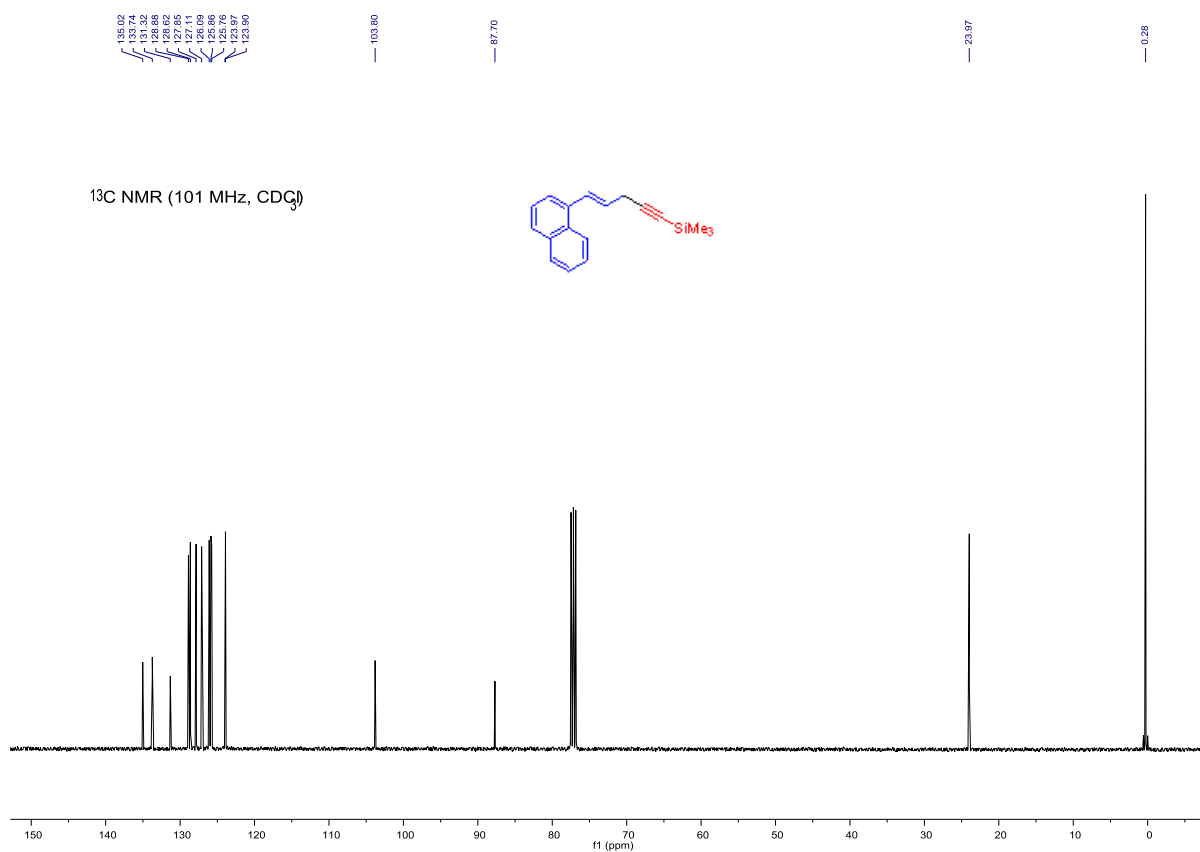



(24) (*E*)-(5-(benzo[*b*]thiophen-3-yl)pent-4-en-1-yn-1-yl)trimethylsilane (**3o**)

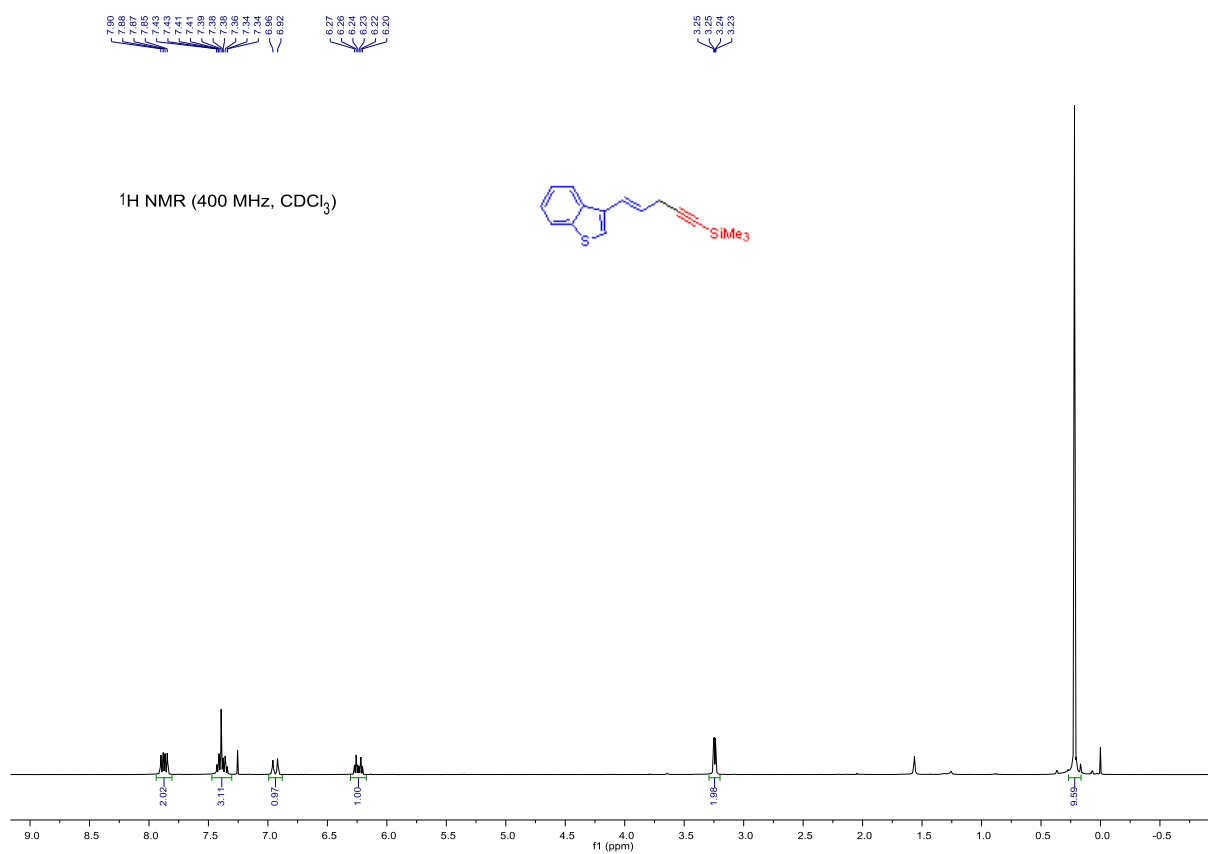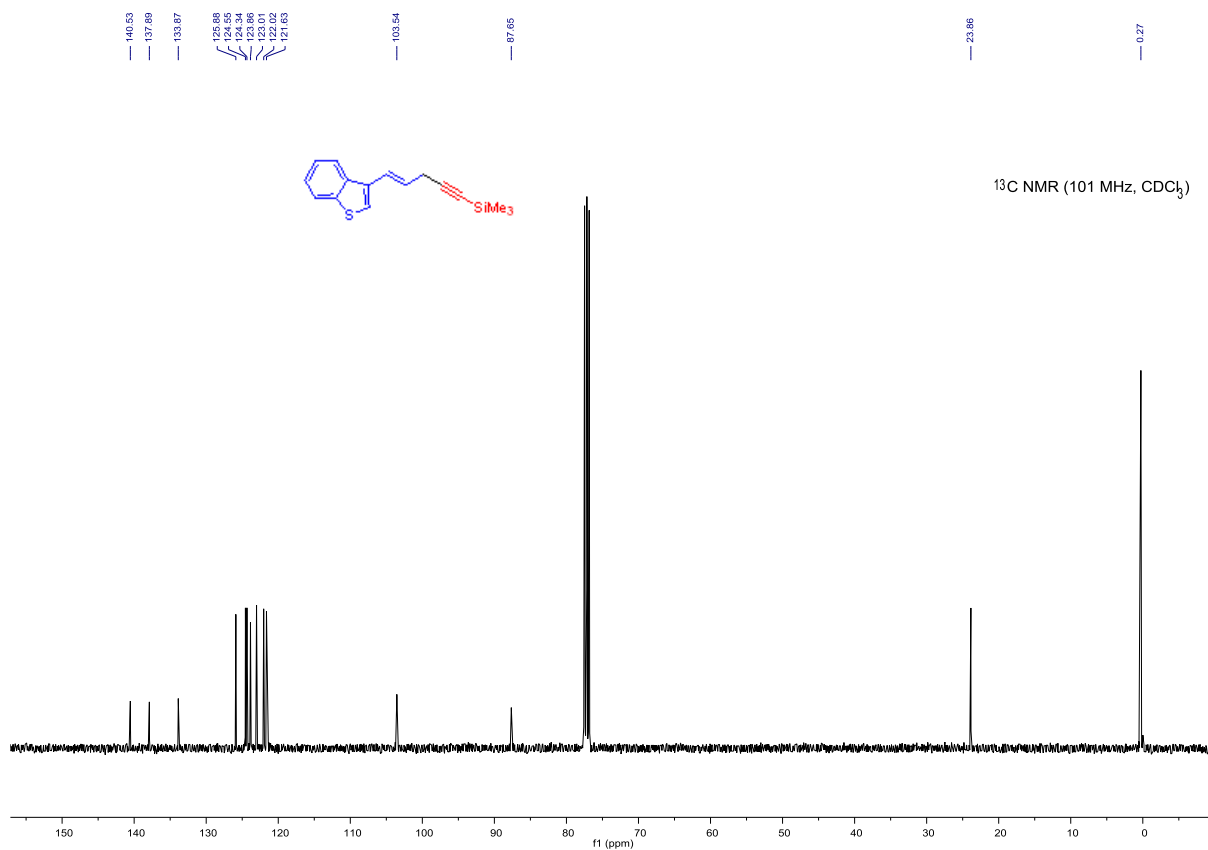

(25) (*E*)-trimethyl(5-(thiophen-2-yl)pent-4-en-1-yn-1-yl)silane (**3p**)

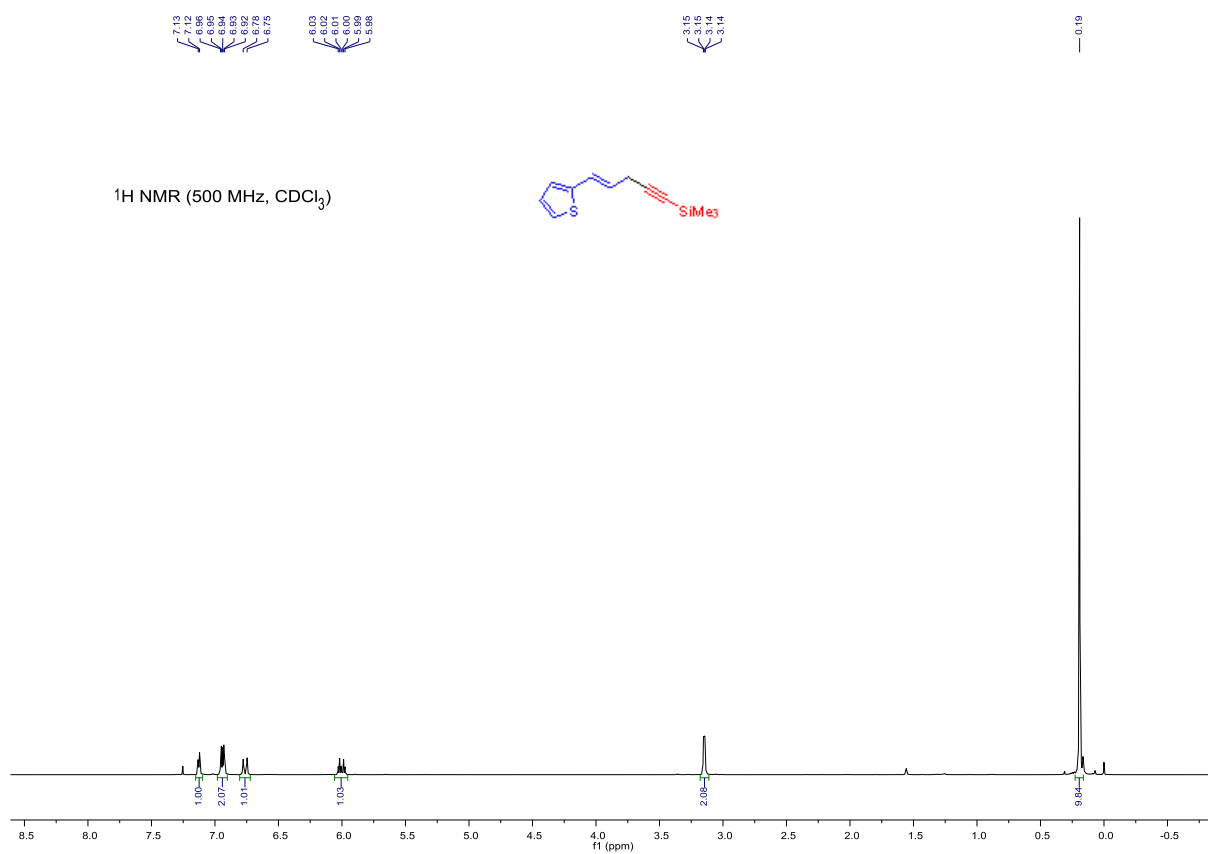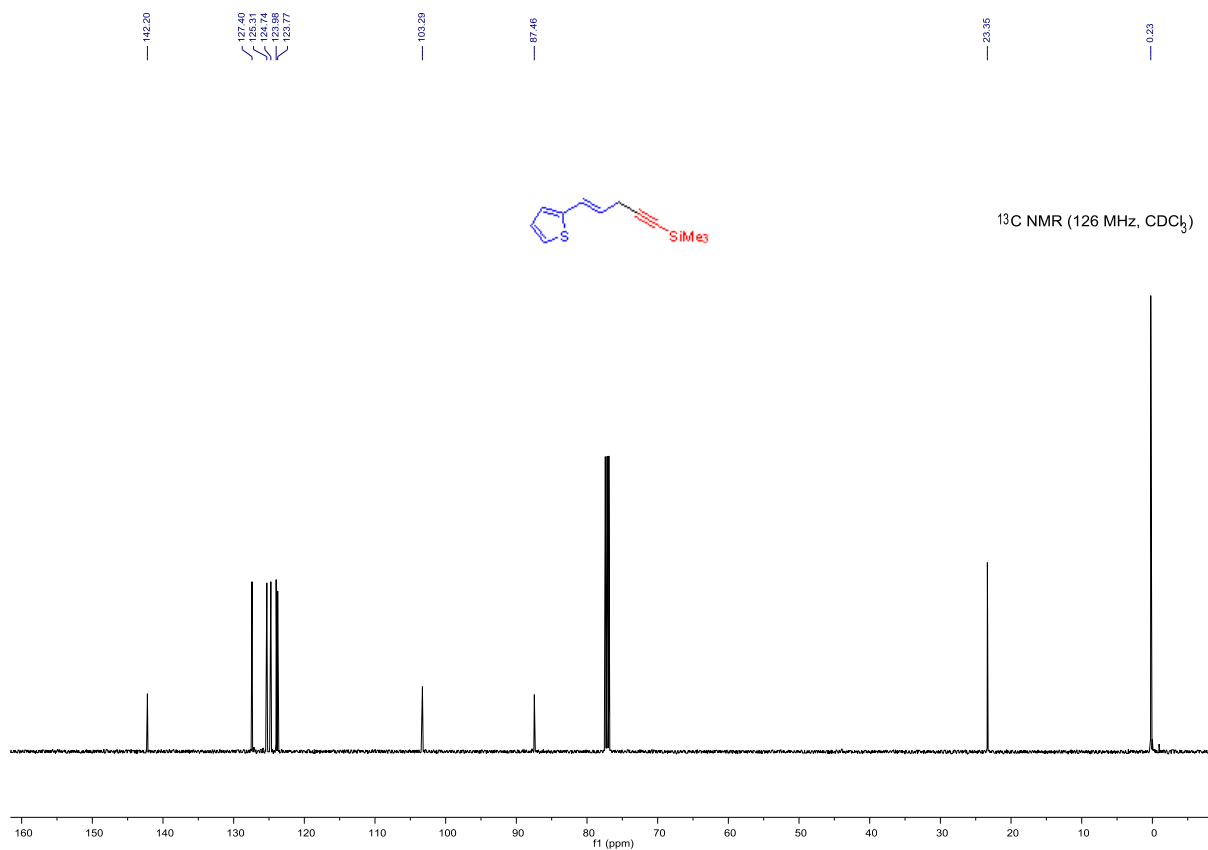

(26) (*E*)-(5-(furan-2-yl)pent-4-en-1-yn-1-yl)trimethylsilane (**3q**)

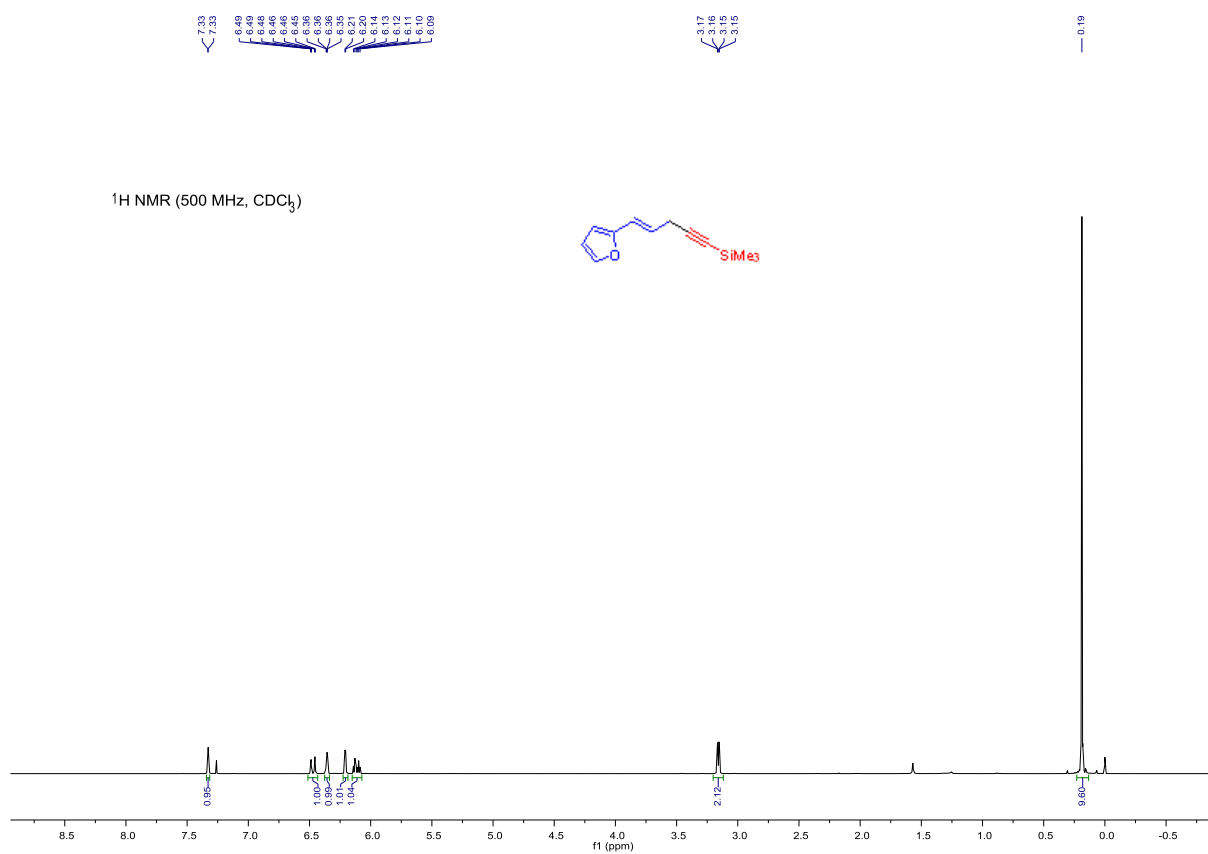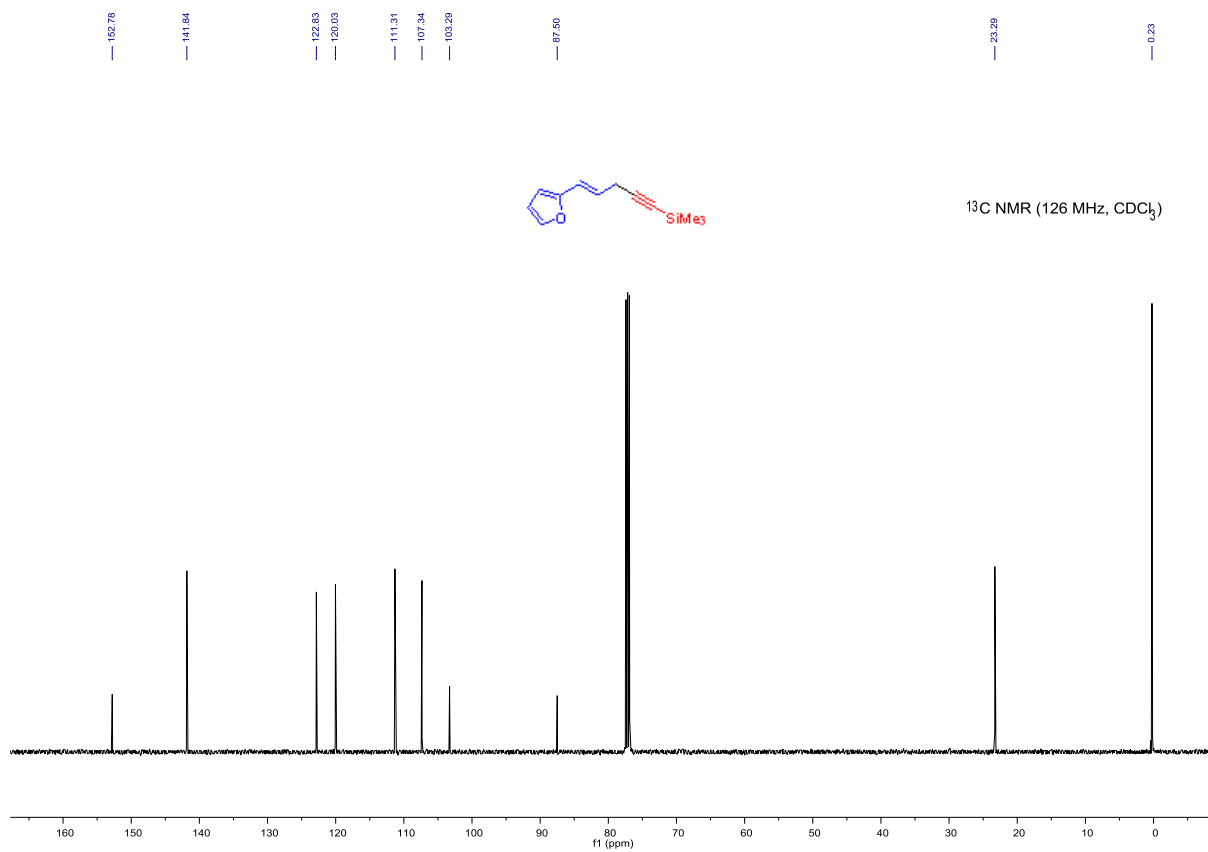

(27) (*E*)-trimethyl(3-methyl-5-phenylpent-4-en-1-yn-1-yl)silane (**3r**)

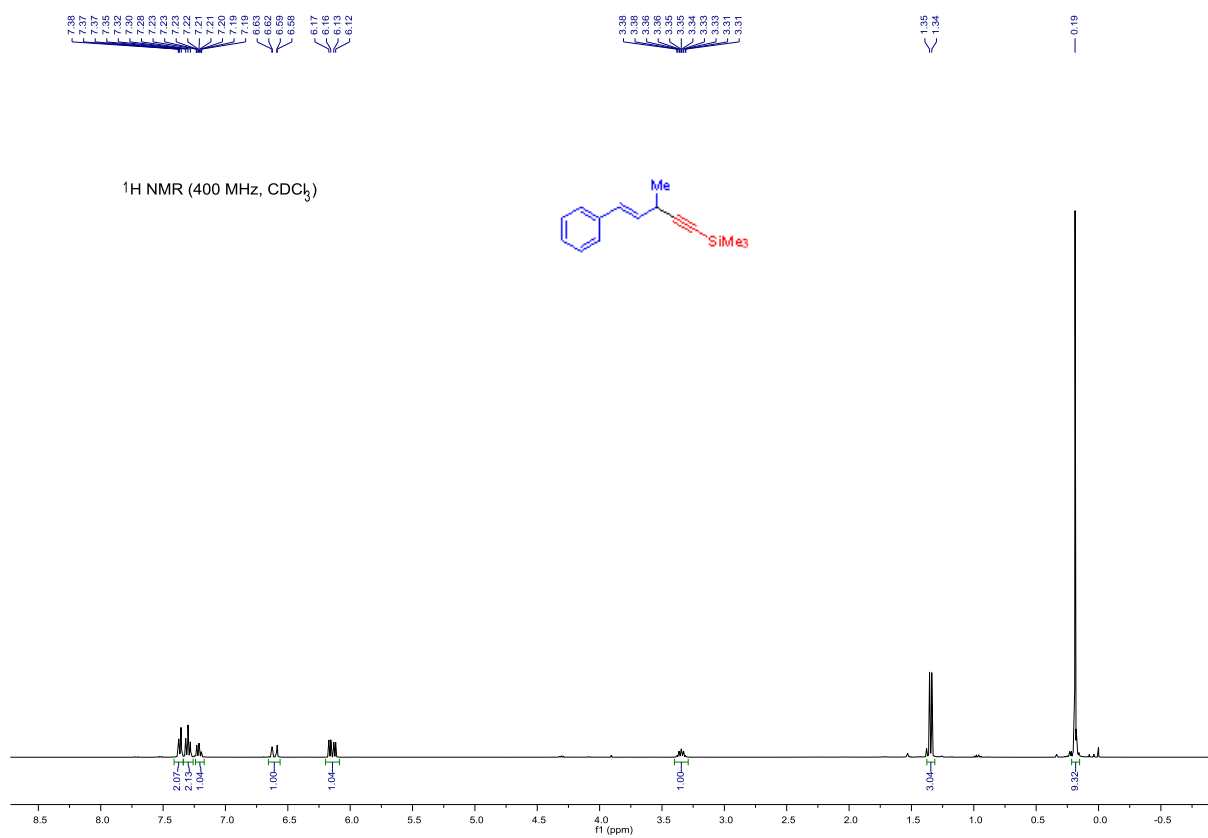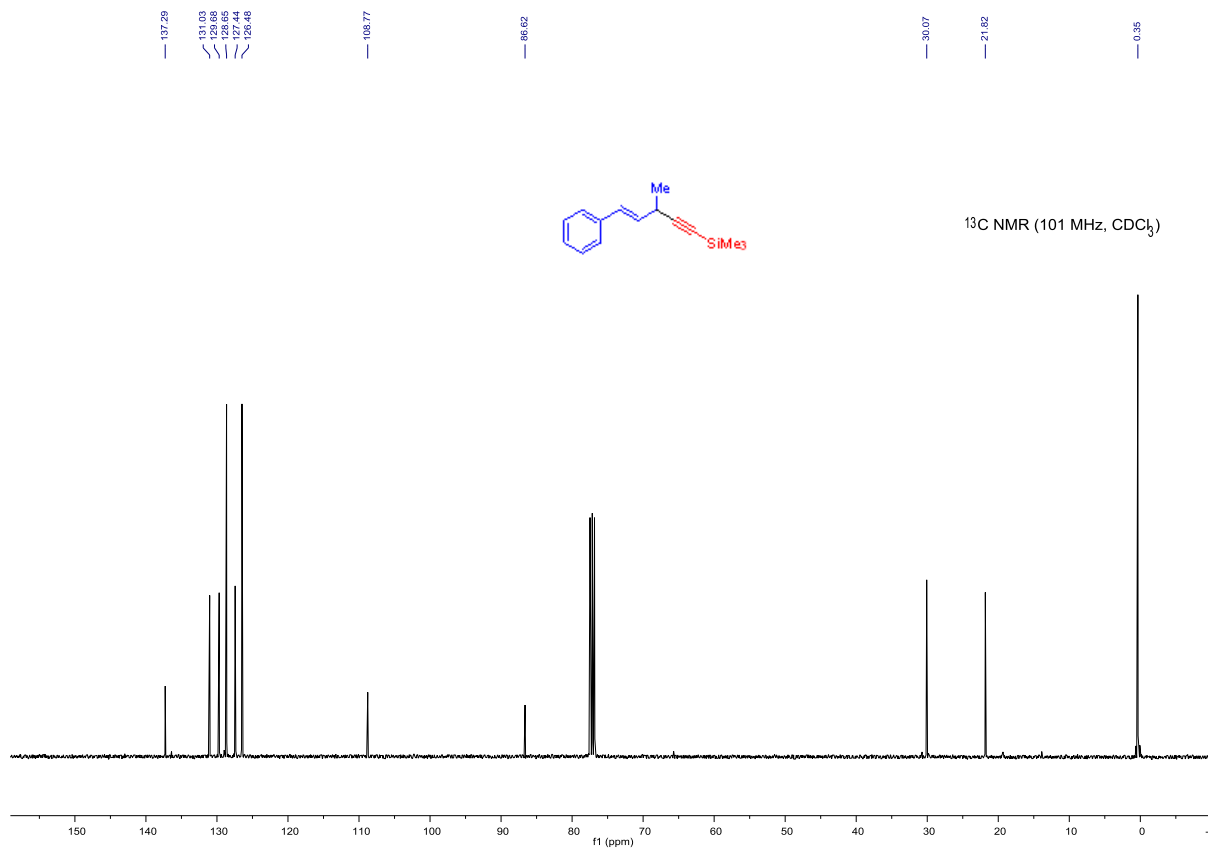

(28) (*E*)-pent-1-en-4-yne-1,3,5-triyltribenzene (**3sa**)

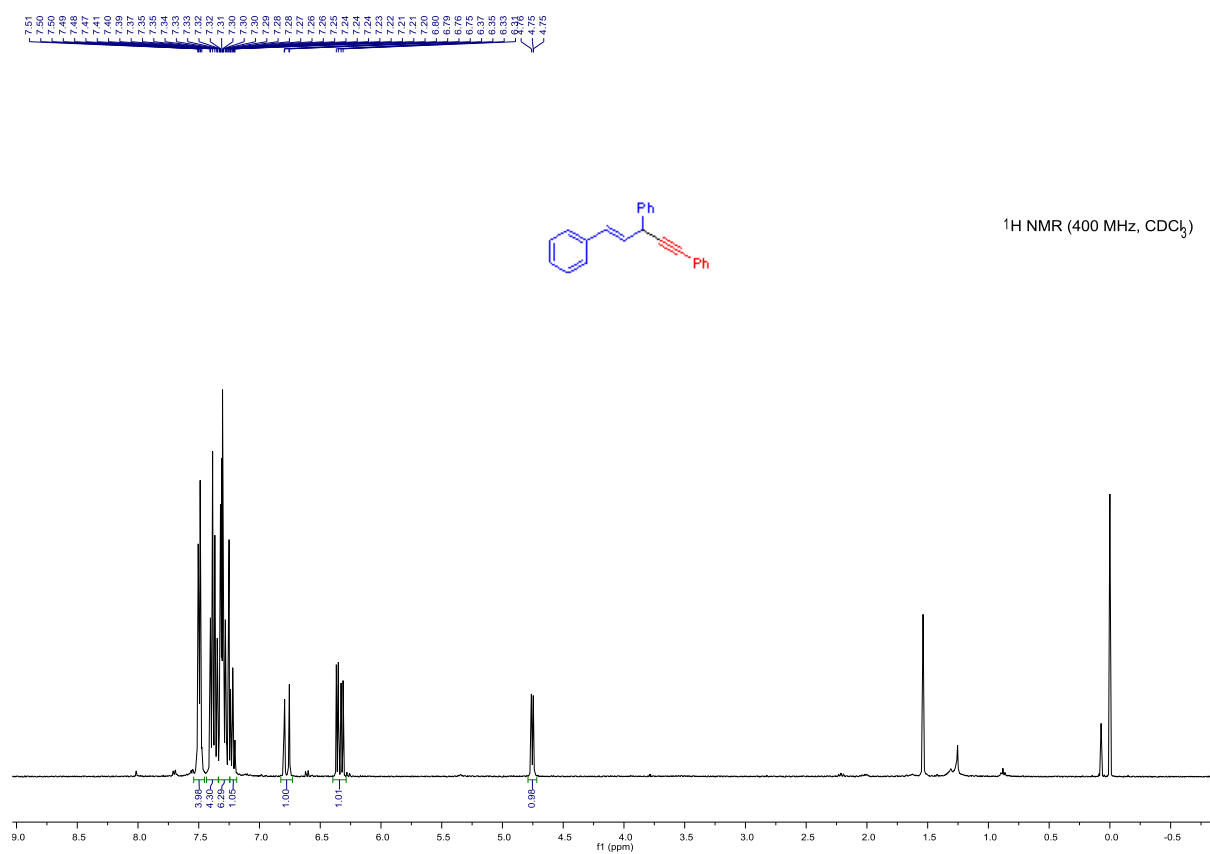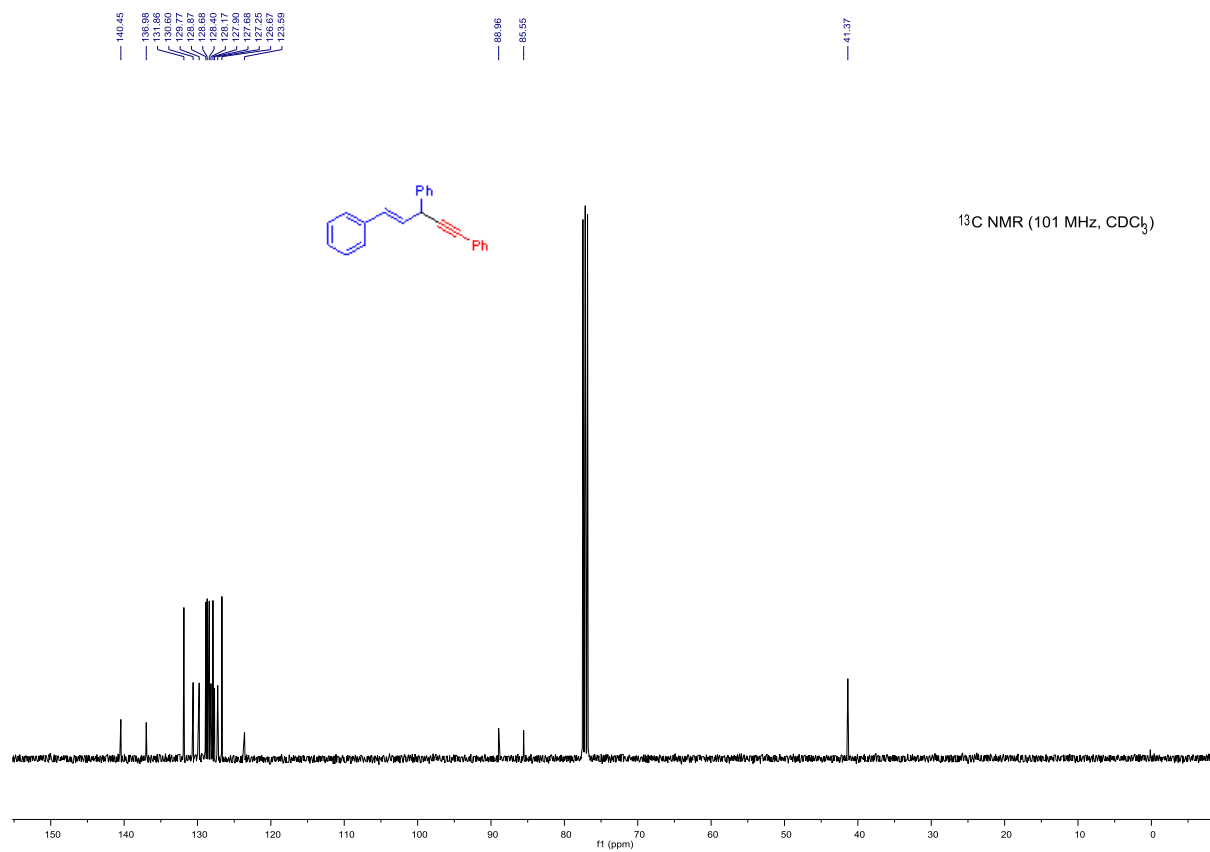

(29) *(E)*-(3,5-diphenylpent-4-en-1-yn-1-yl)trimethylsilane (**3sb**)

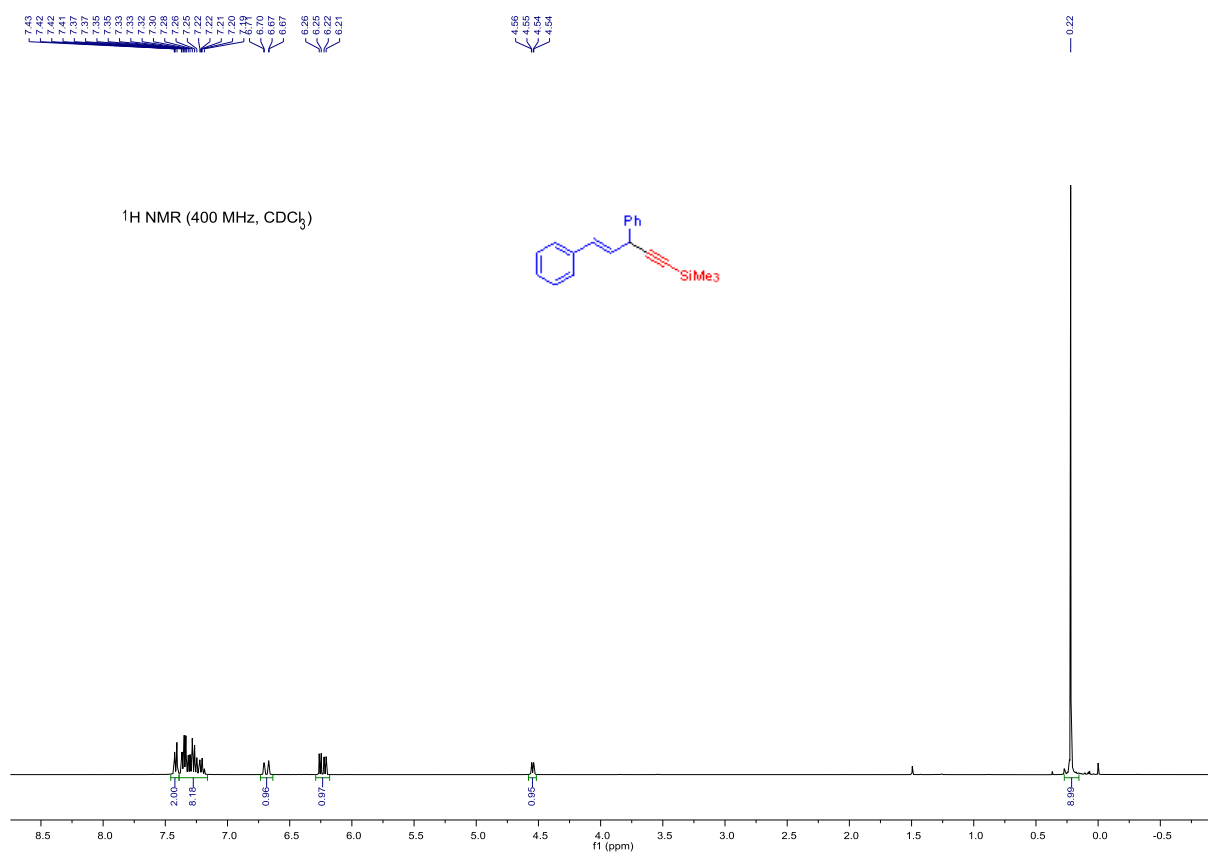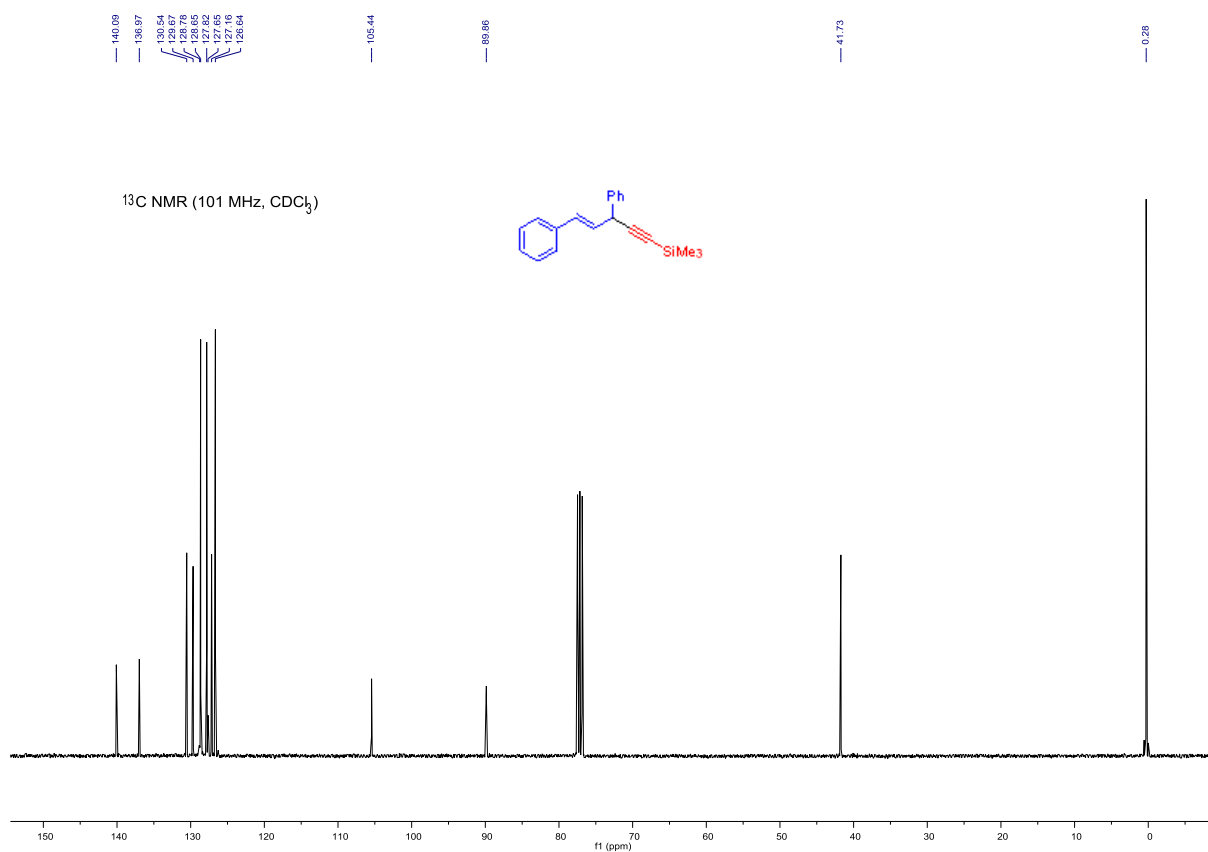

(30) (*E*)-1-methyl-4-(5-phenylpent-1-en-4-yn-1-yl)benzene (**3ta**)

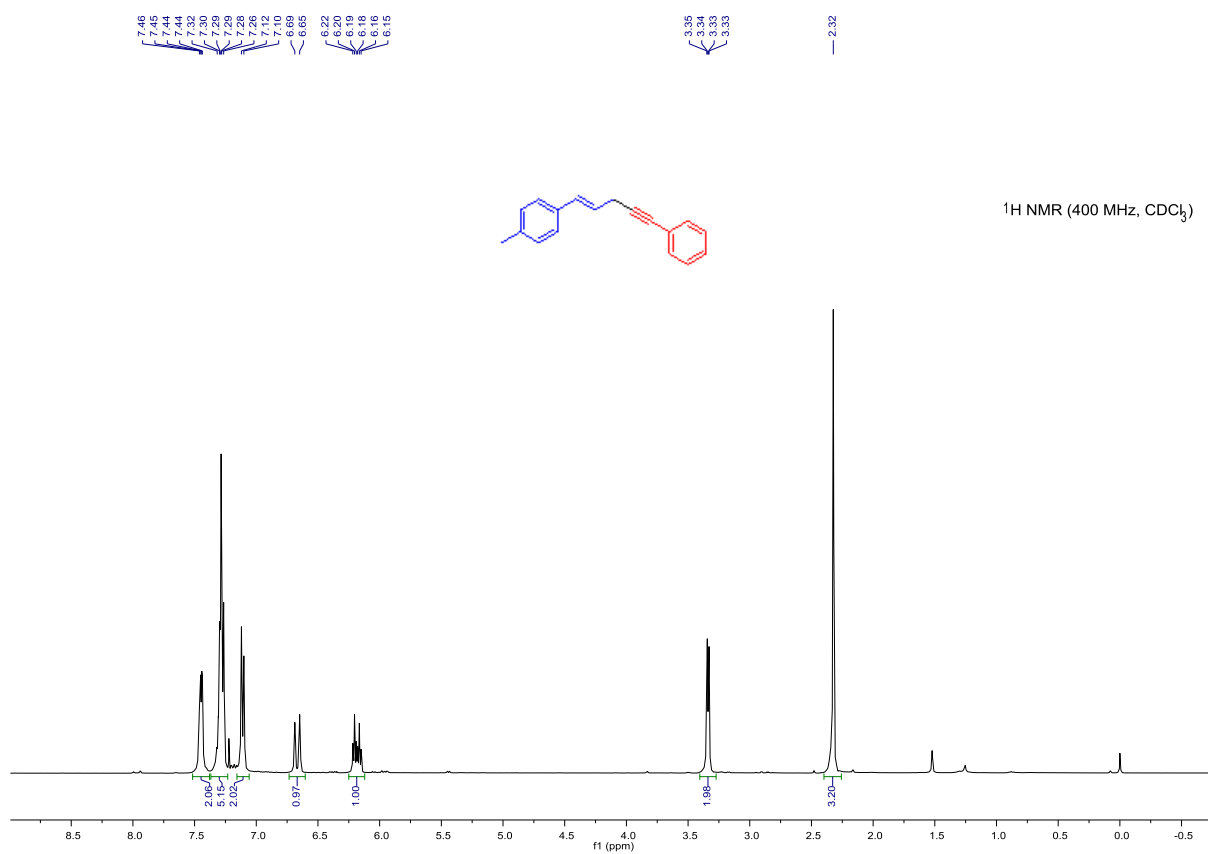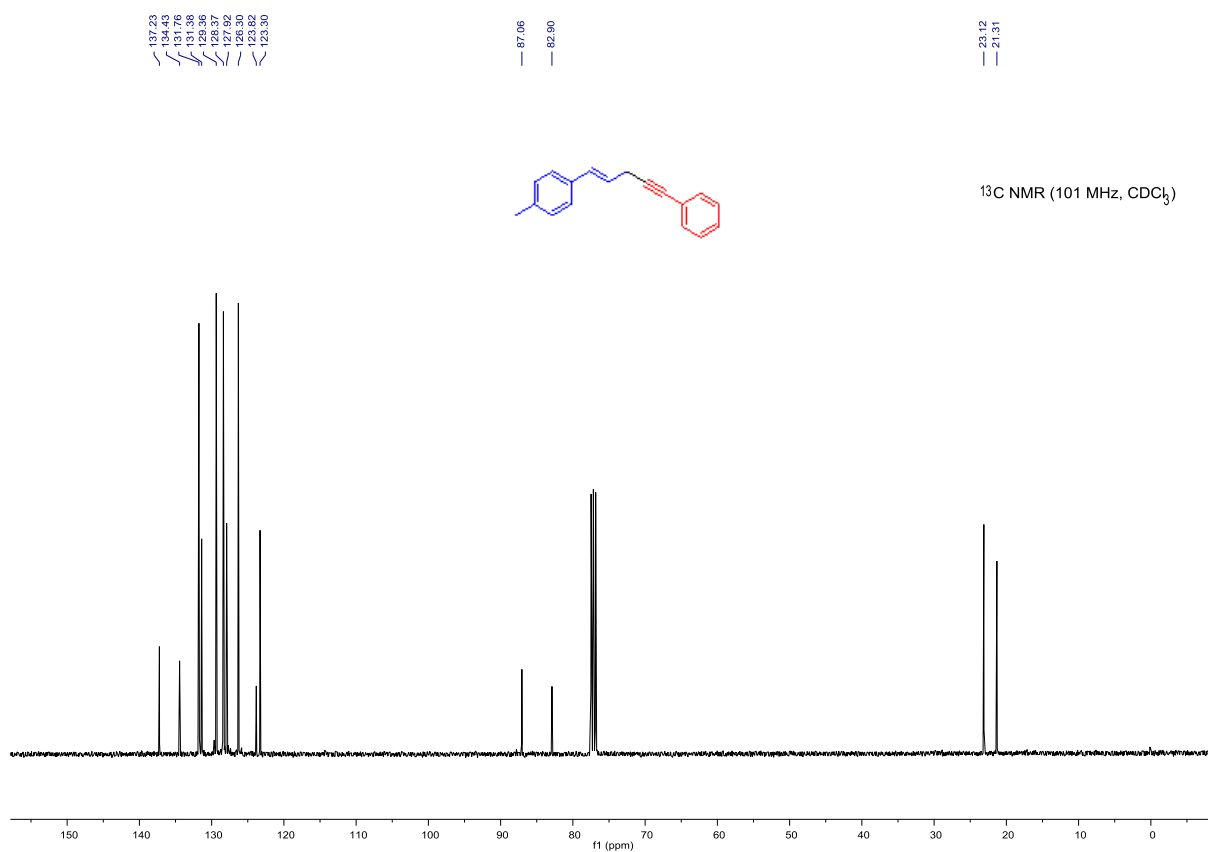

(31) (*E*)-trimethyl(5-(*p*-tolyl)pent-4-en-1-yn-1-yl)silane (**3tb**)

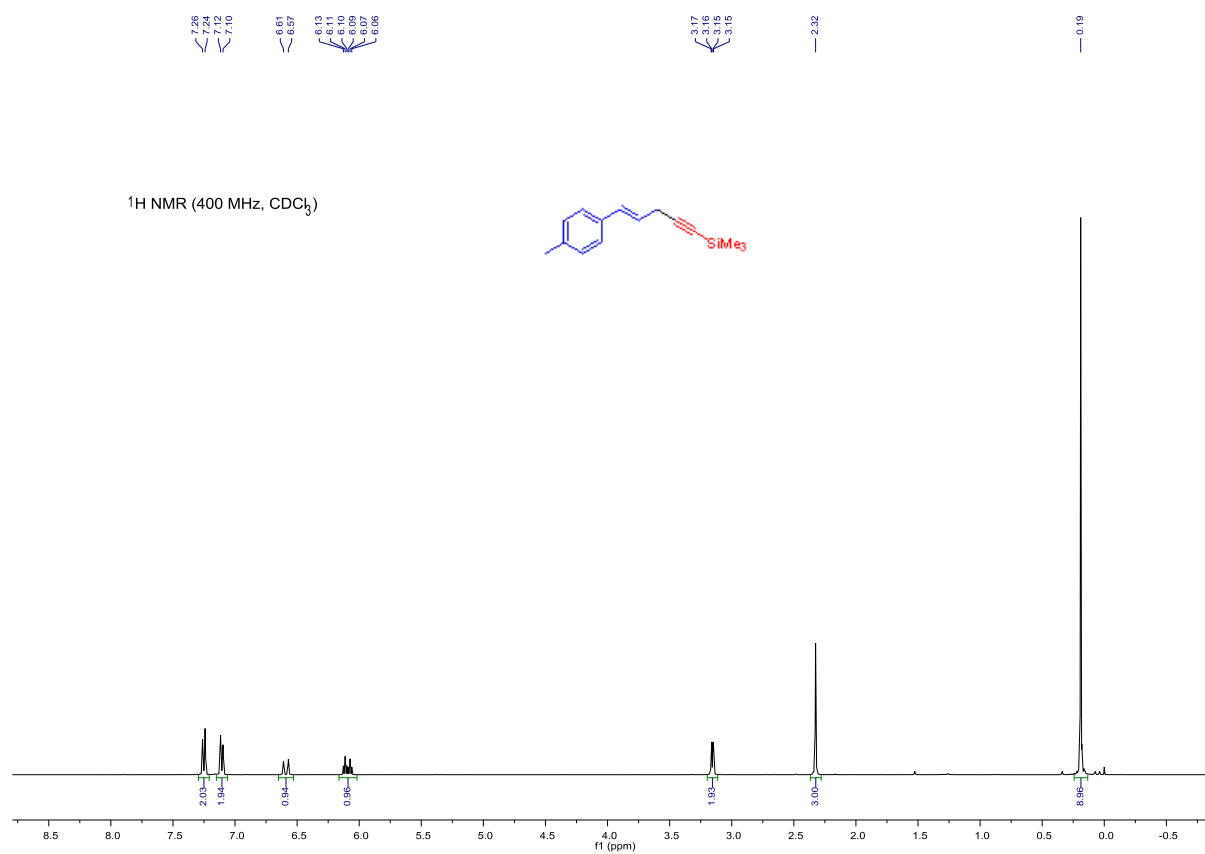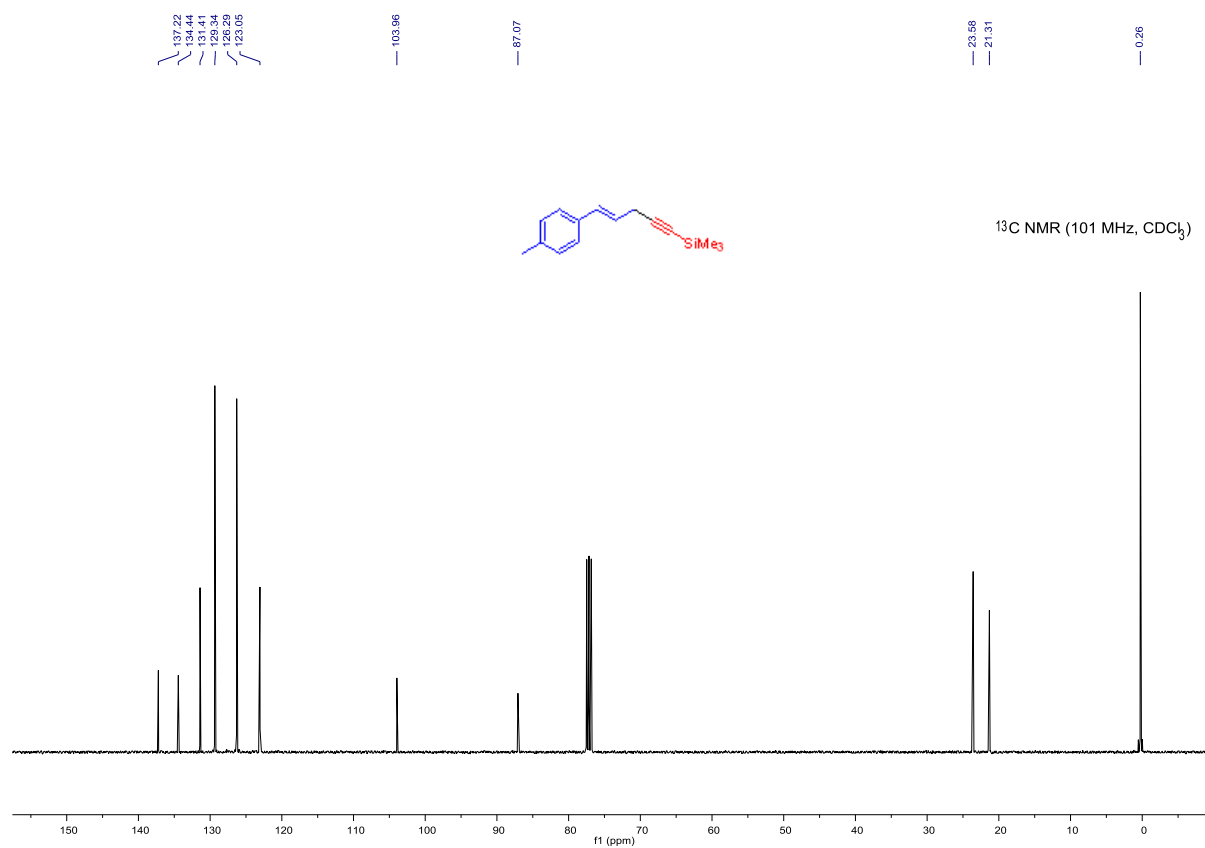



(32) (*E*)-*N,N*-dimethyl-4-(5-(trimethylsilyl)pent-1-en-4-yn-1-yl)aniline (**3u**)

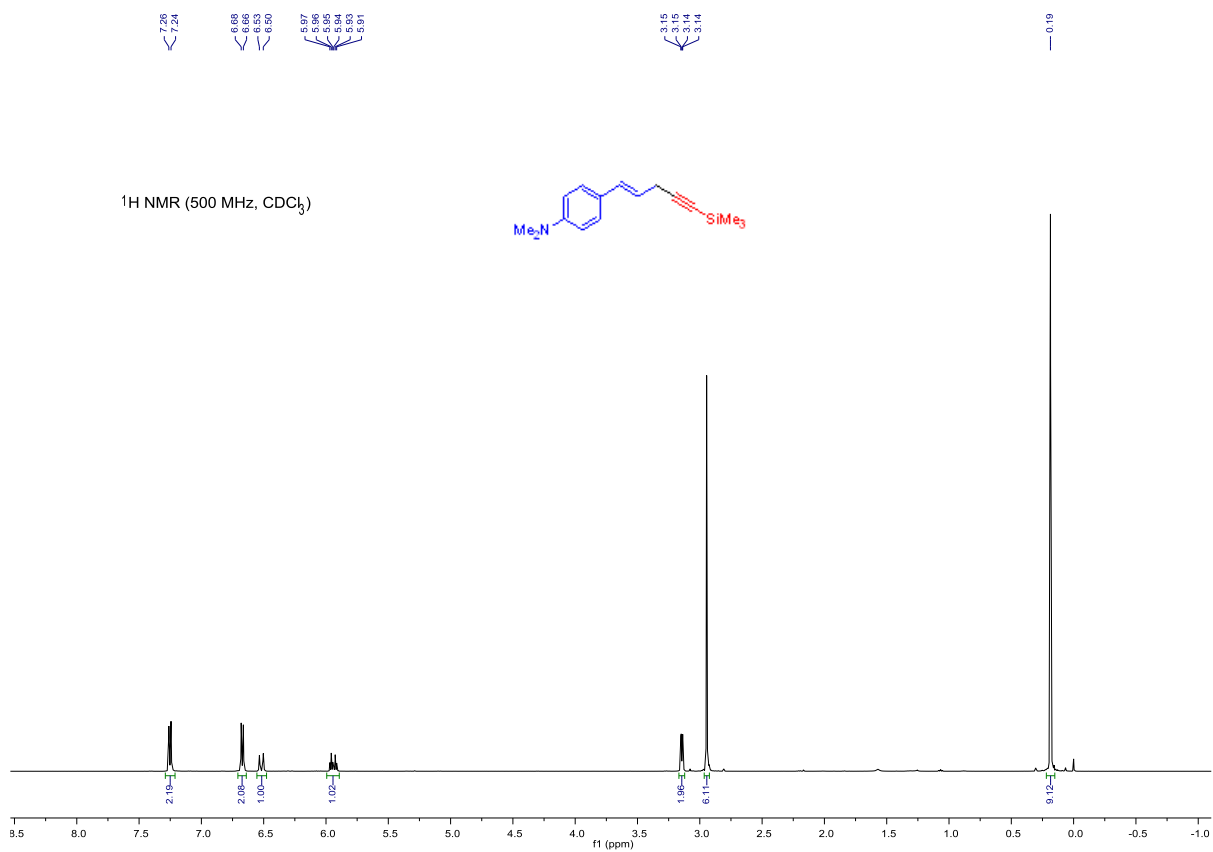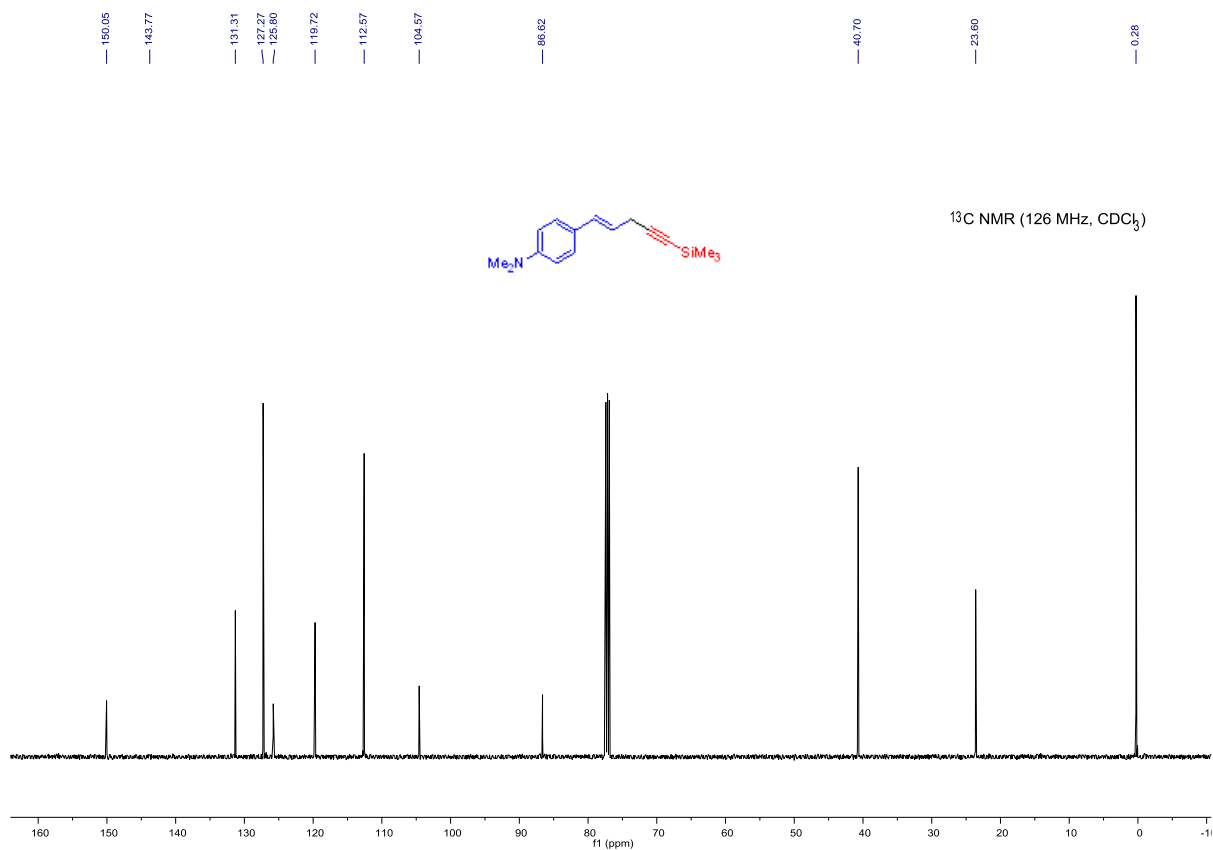

(33) mixture of (*E*)-dec-4-en-1-ynyltrimethylsilane (**3v1**) and trimethyl(3-vinyloct-1-ynyl)silane (**3v2**)

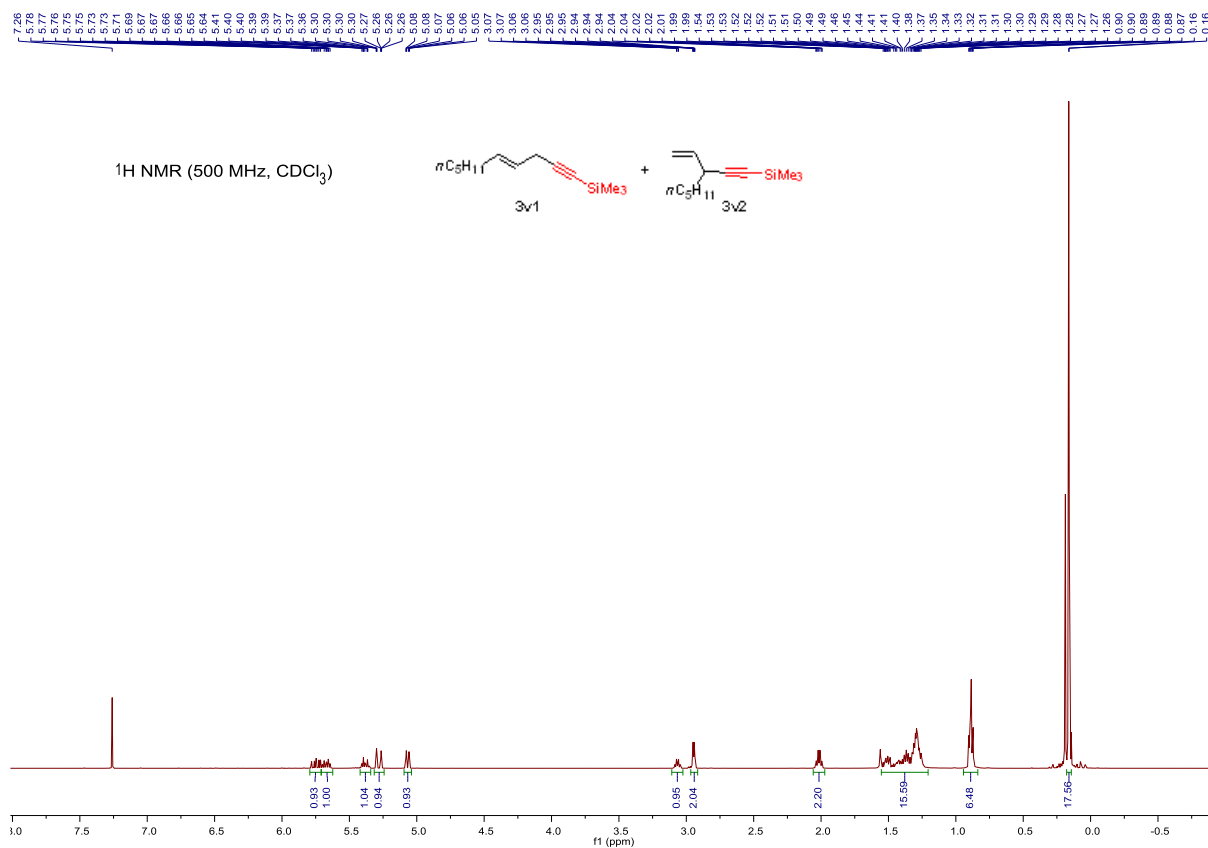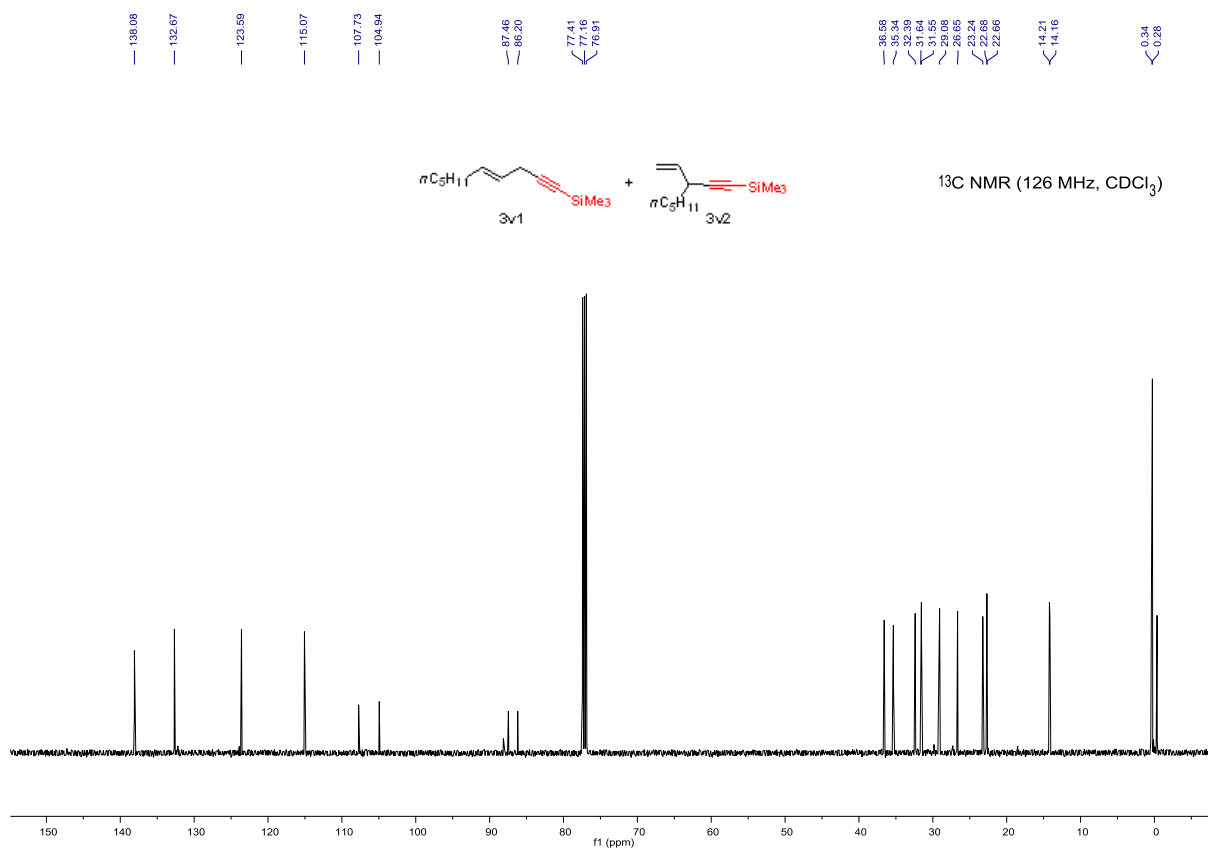

(34) (*E*)-1-methyl-4-(5-phenylpent-4-en-1-yn-1-yl)benzene (**3ac**)

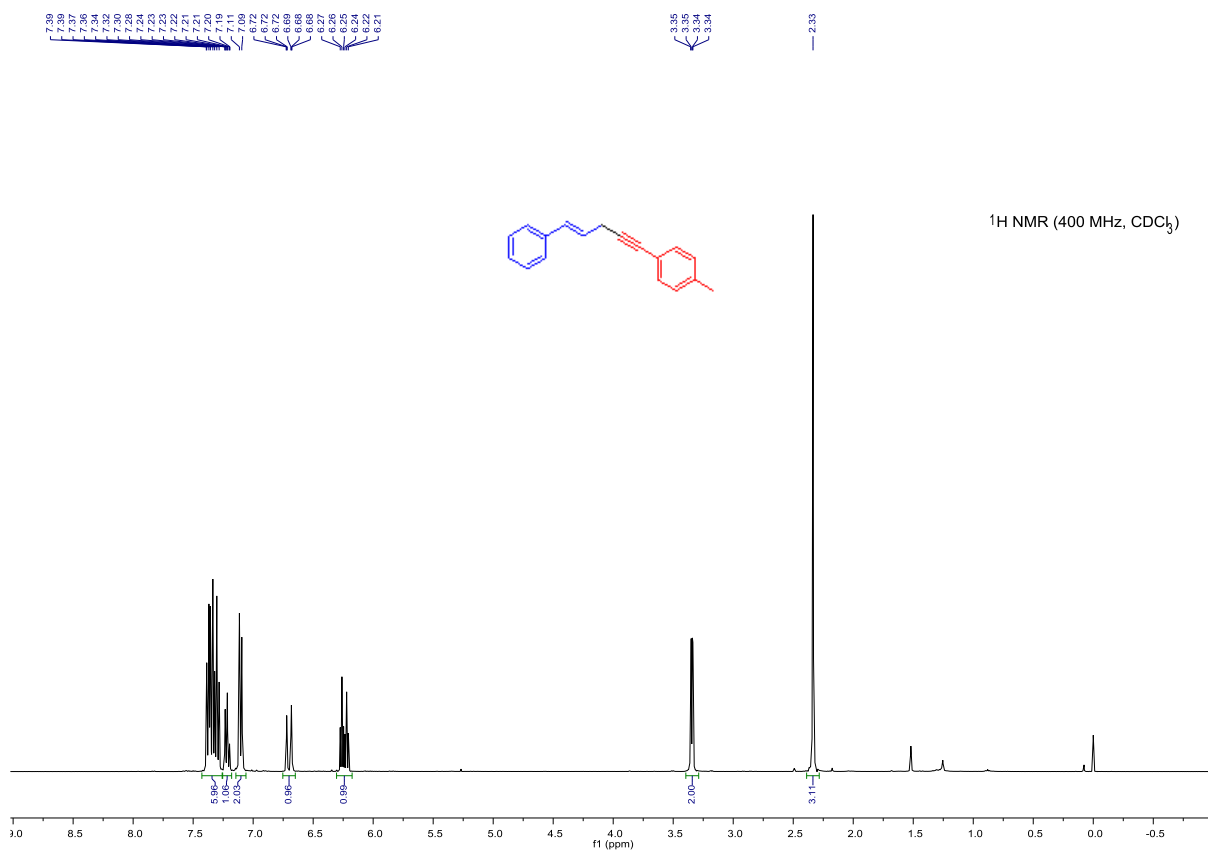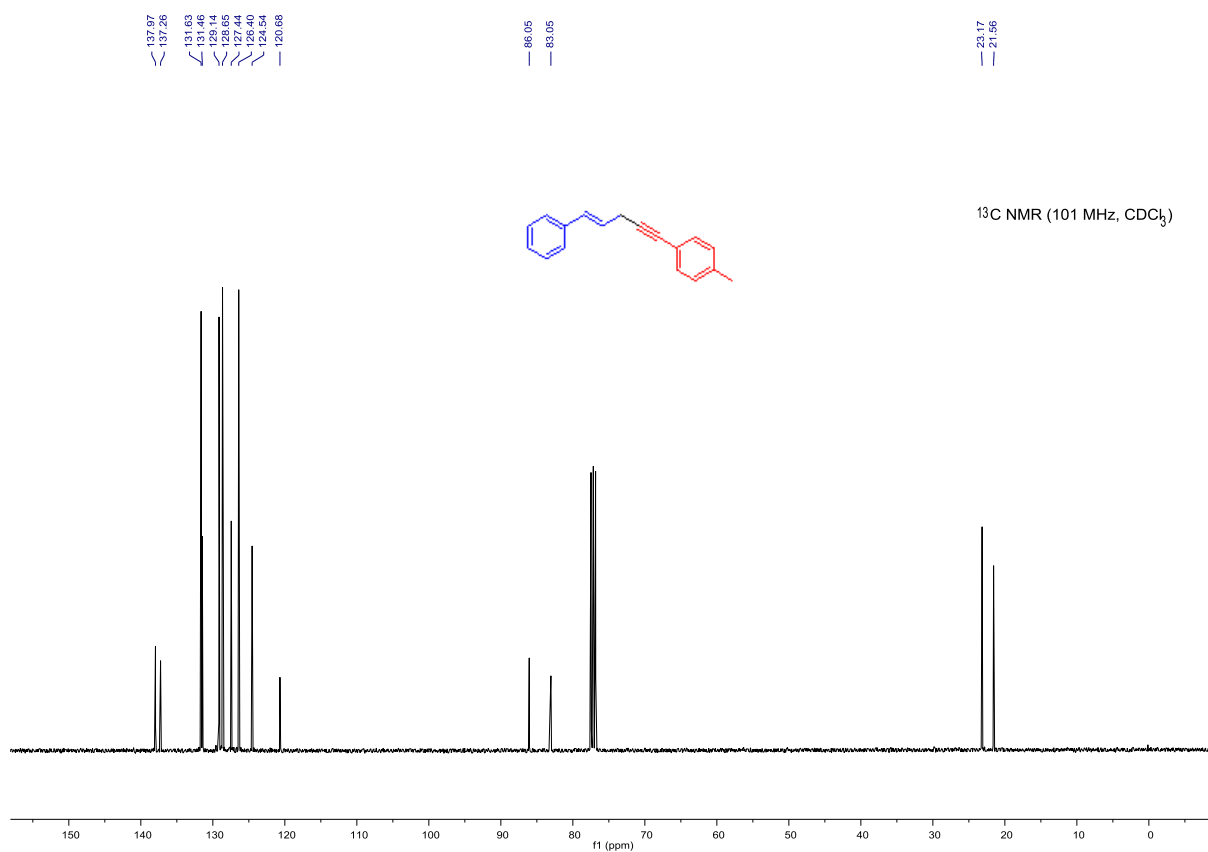

(35) (*E*)-1-methoxy-4-(5-phenylpent-4-en-1-yn-1-yl)benzene (**3ad**)

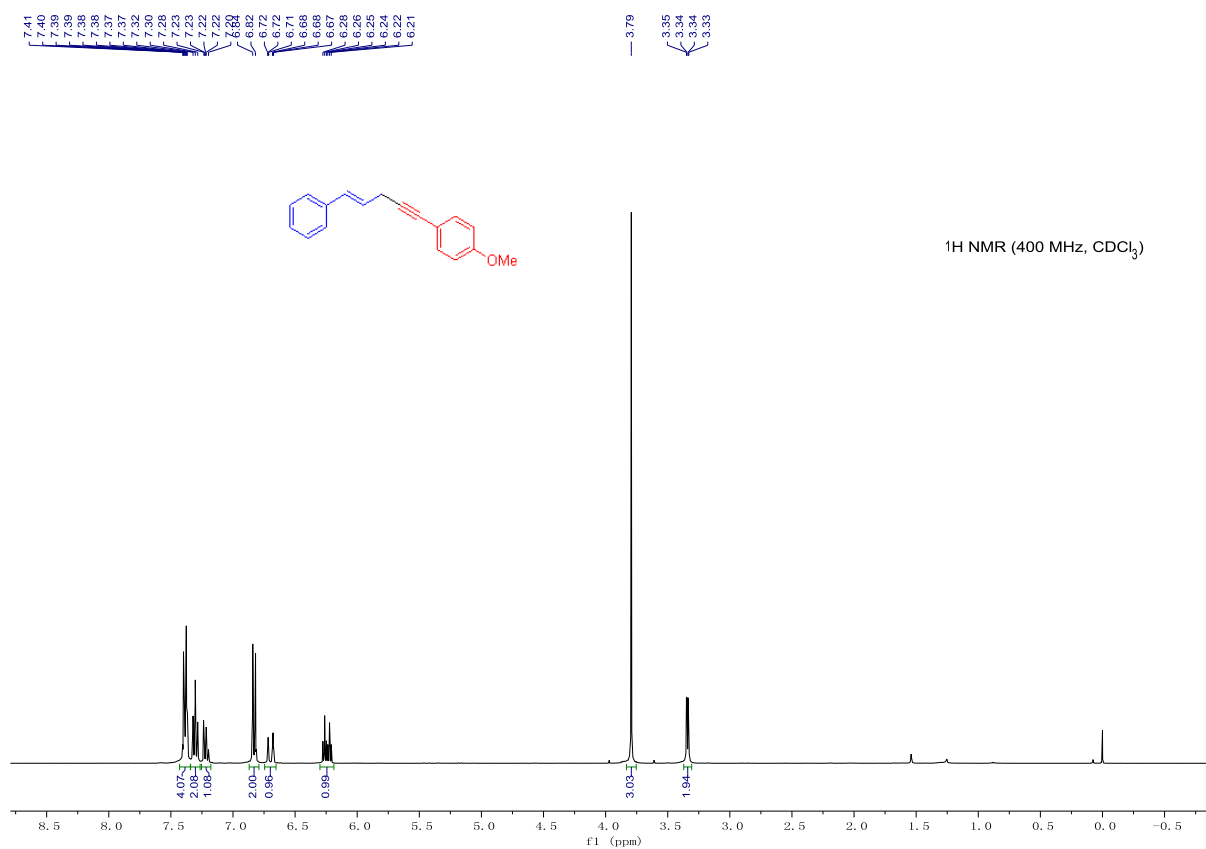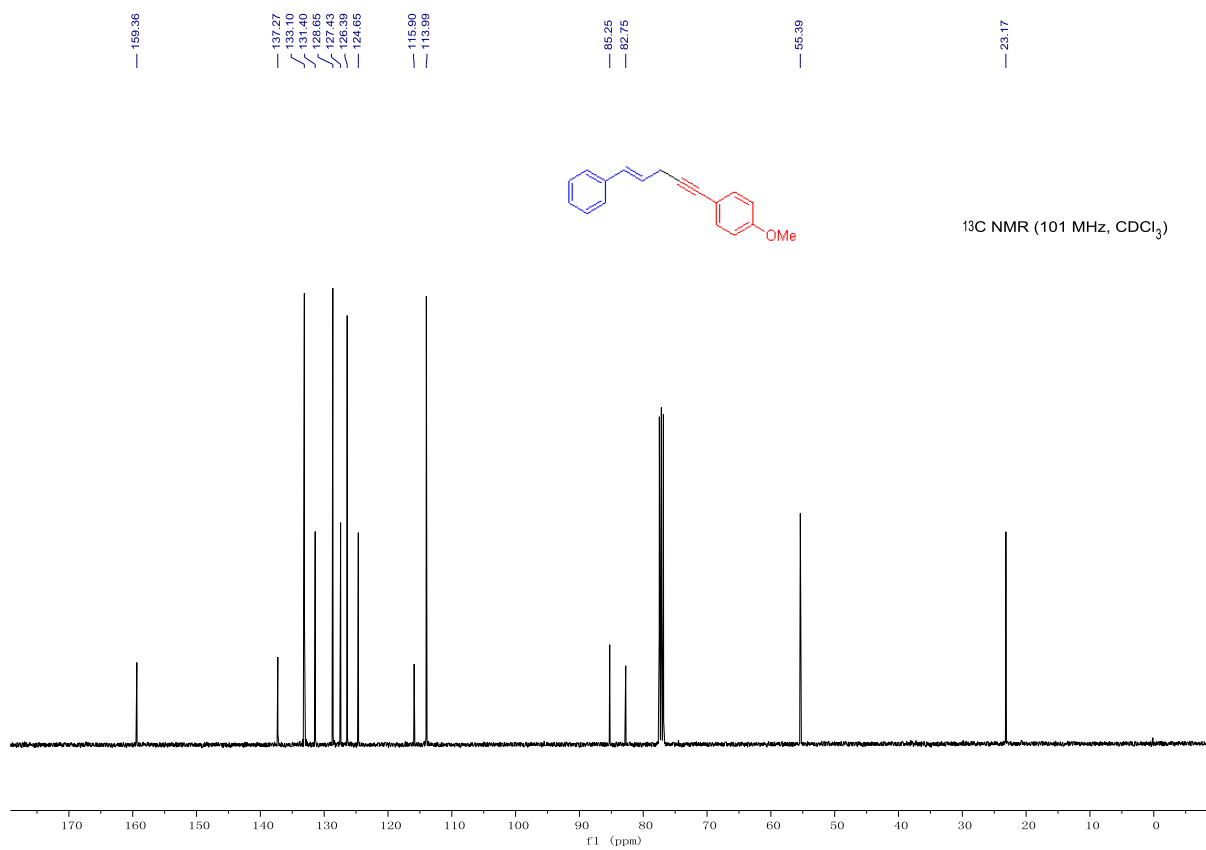

(36) (*E*)-1-fluoro-4-(5-phenylpent-4-en-1-yn-1-yl)benzene (**3ae**)

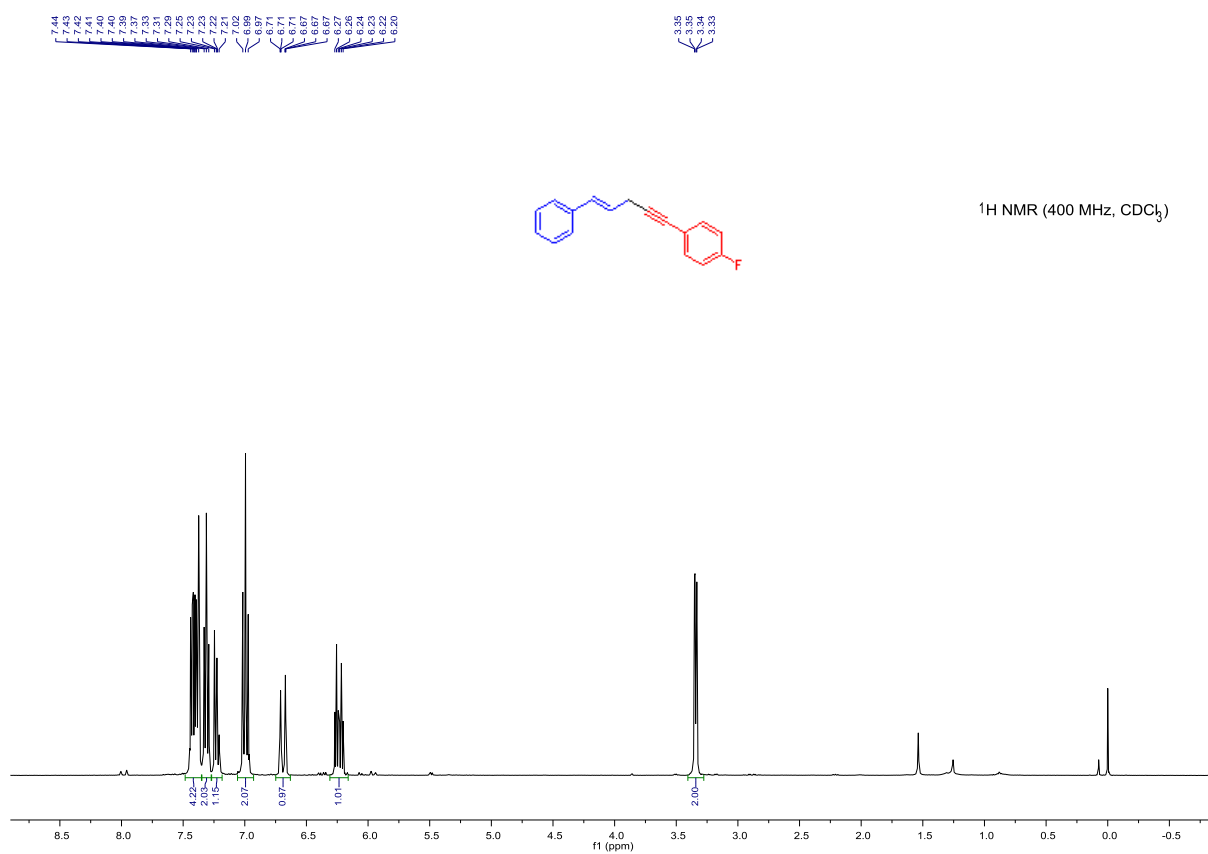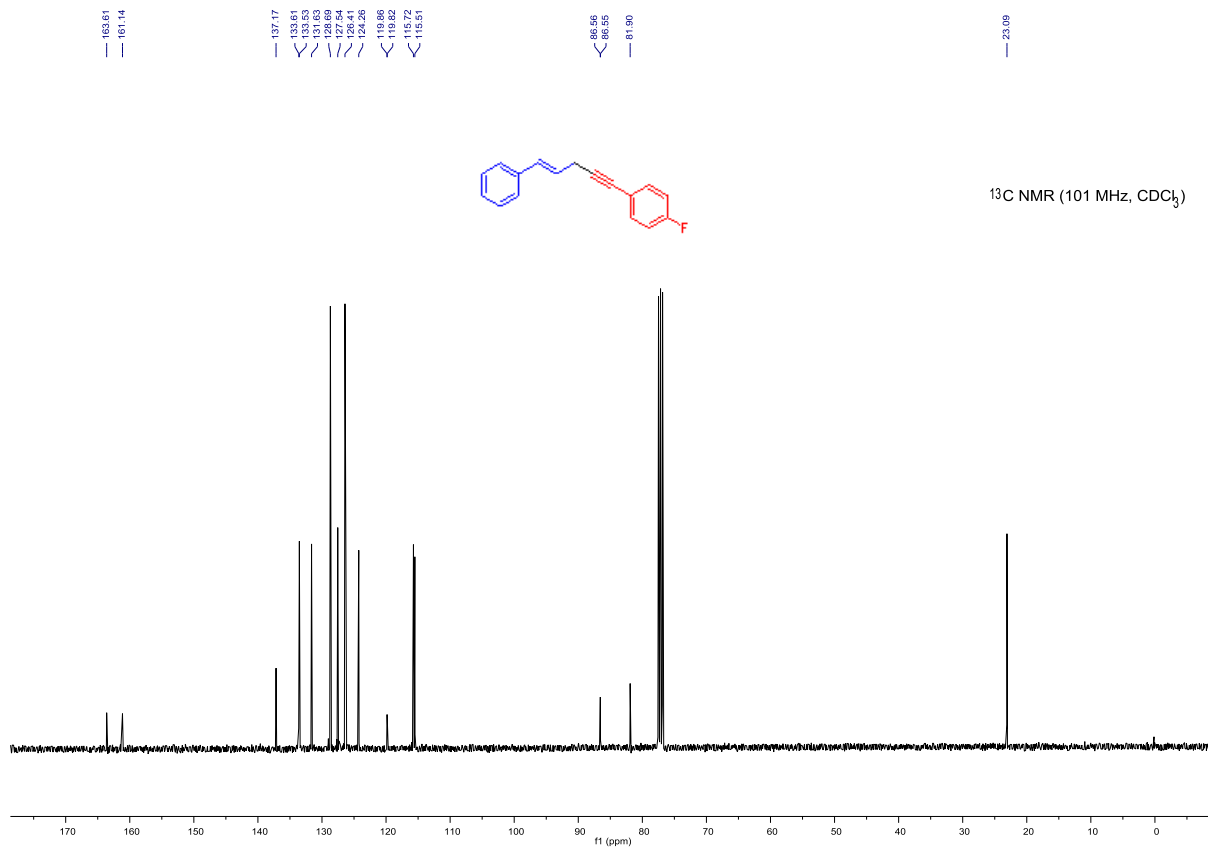

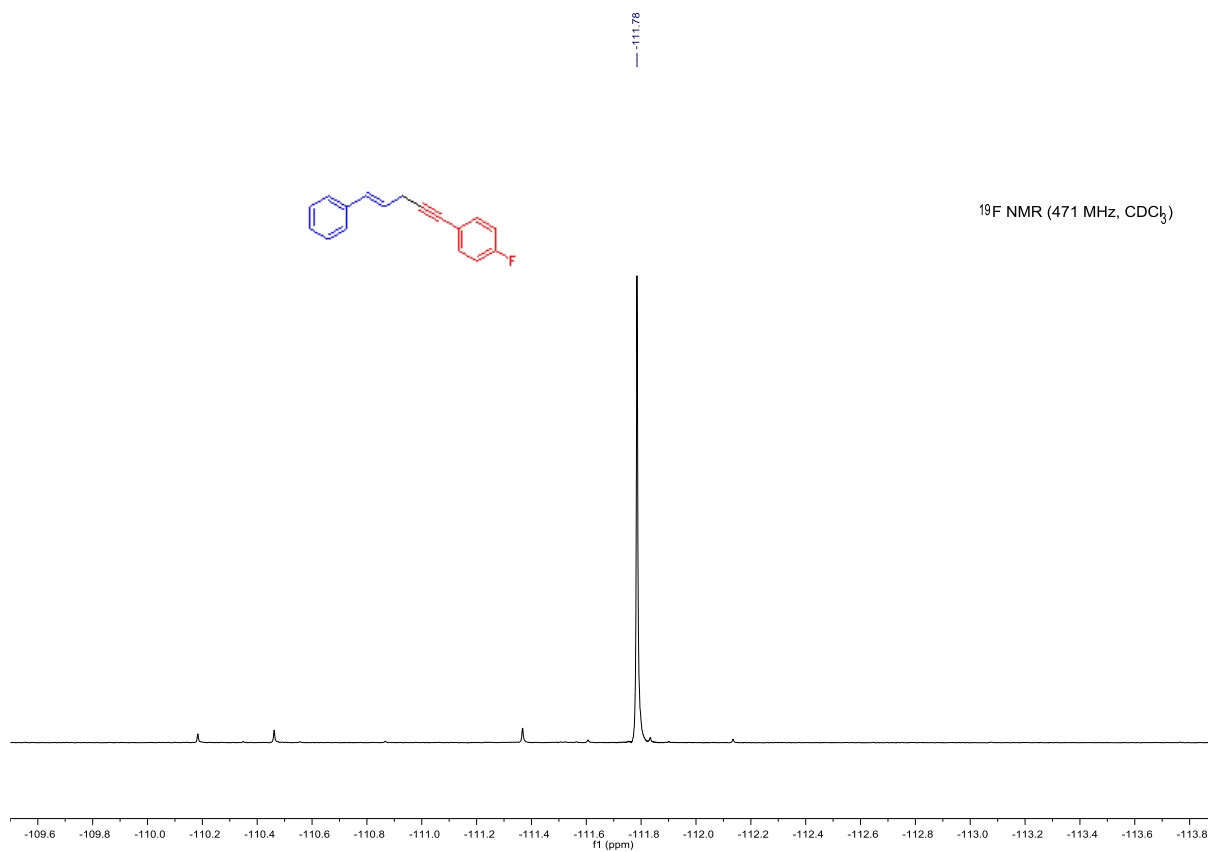

(37) (*E*)-non-1-en-4-yn-1-ylbenzene (**3af**)

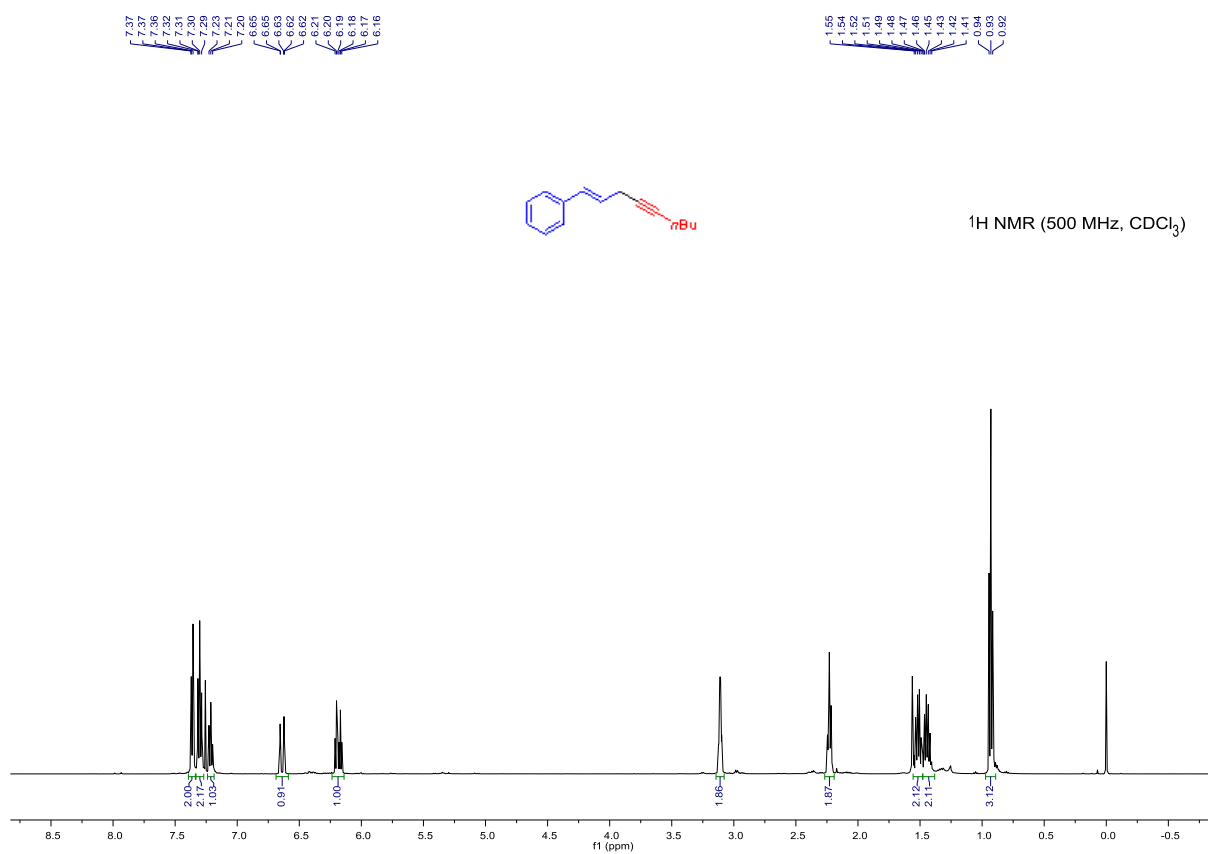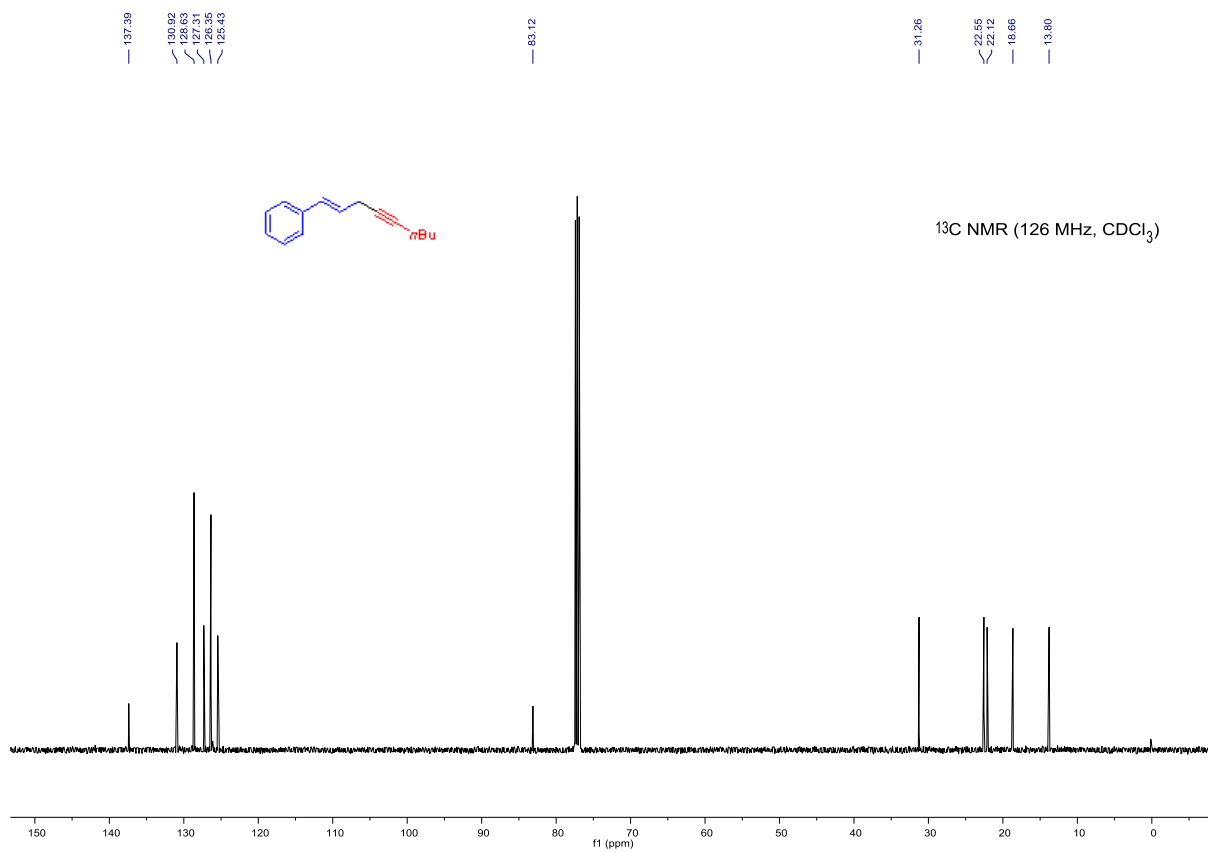

(38) (*E*)-(5-cyclopropylpent-1-en-4-yn-1-yl)benzene (**3ag**)

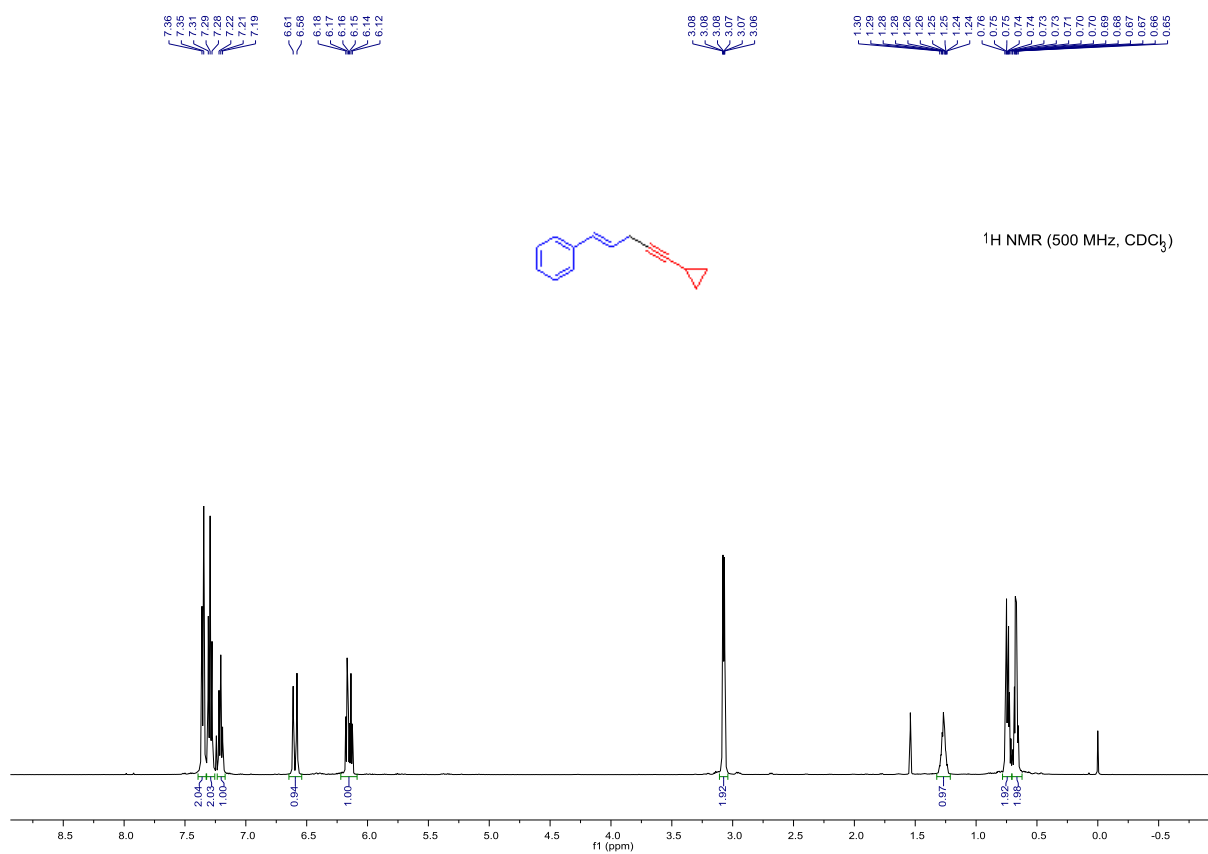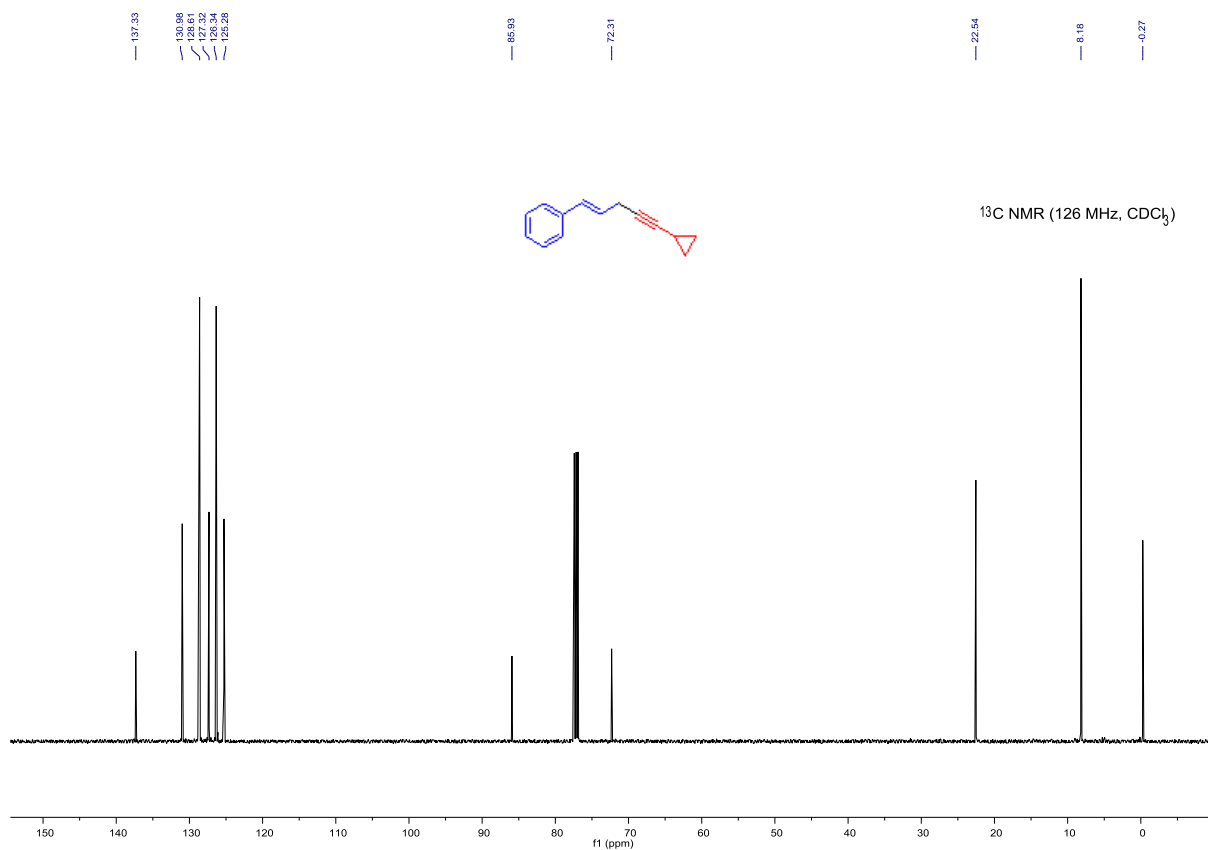



(39) (E)-1-(pent-1-en-3-yn-1-yl)-4-(trifluoromethyl)benzene (4)

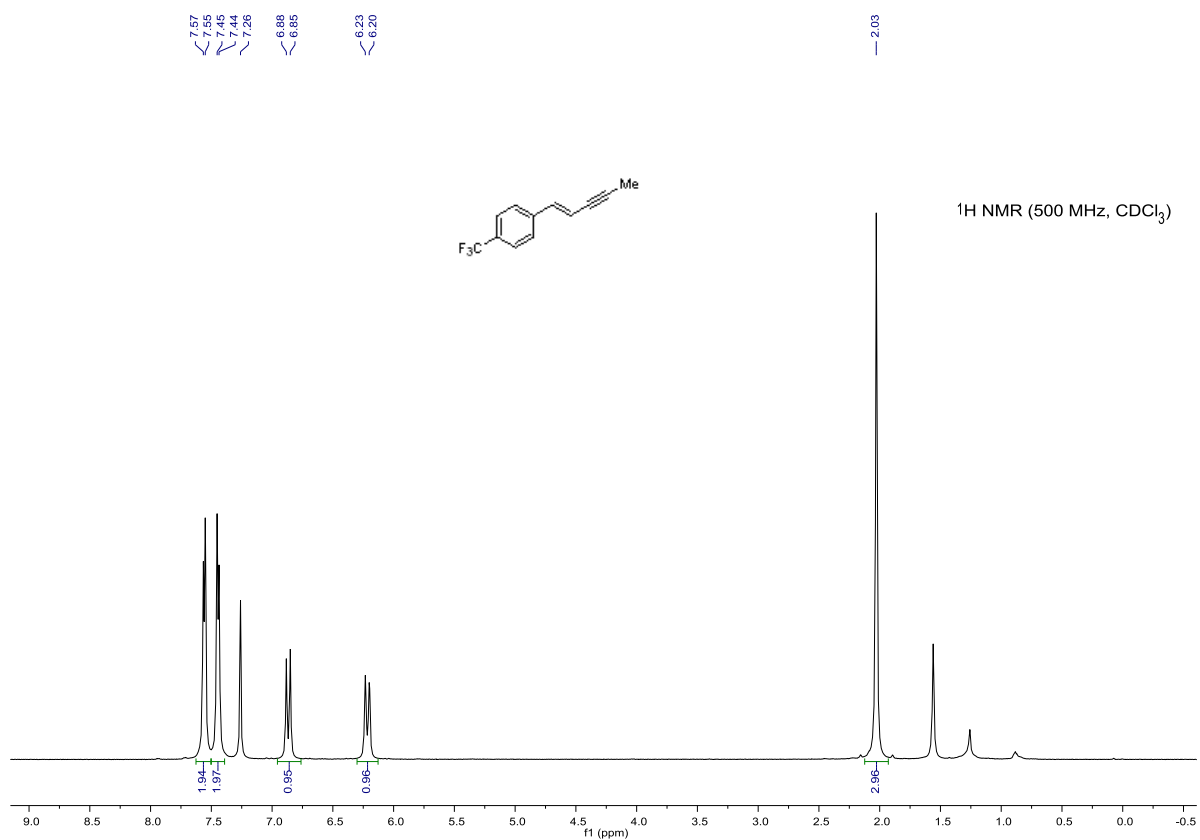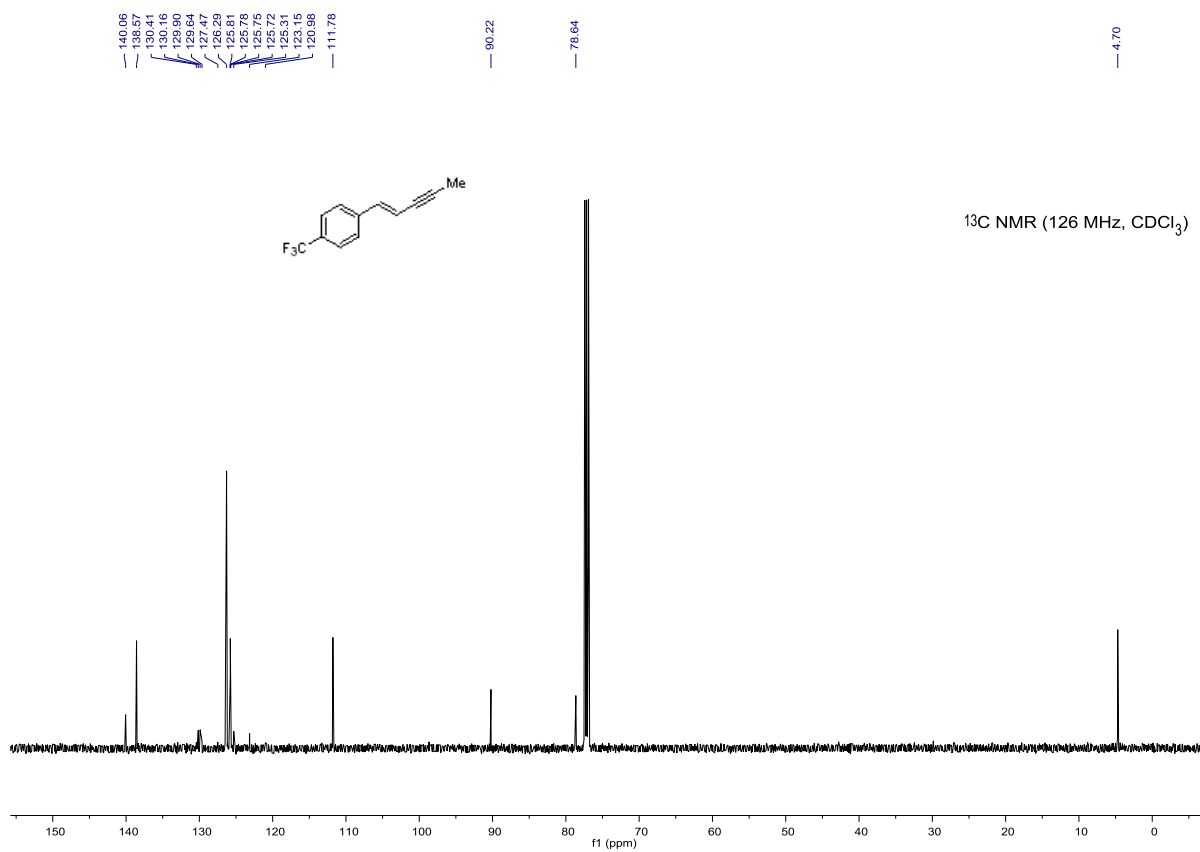

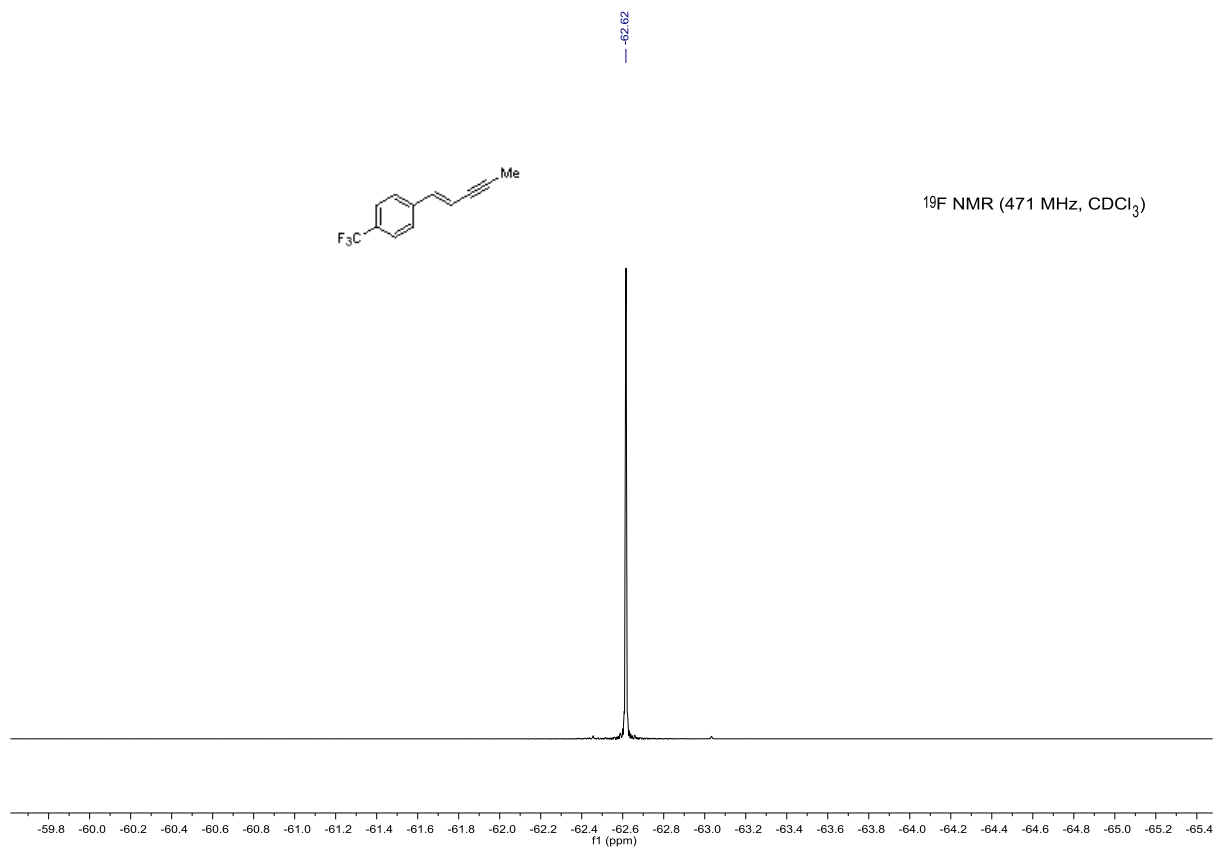

(40) ethyl (*E*)-4-(5-(4-(trifluoromethyl)phenyl)pent-4-en-1-yn-1-yl)benzoate (**5**)

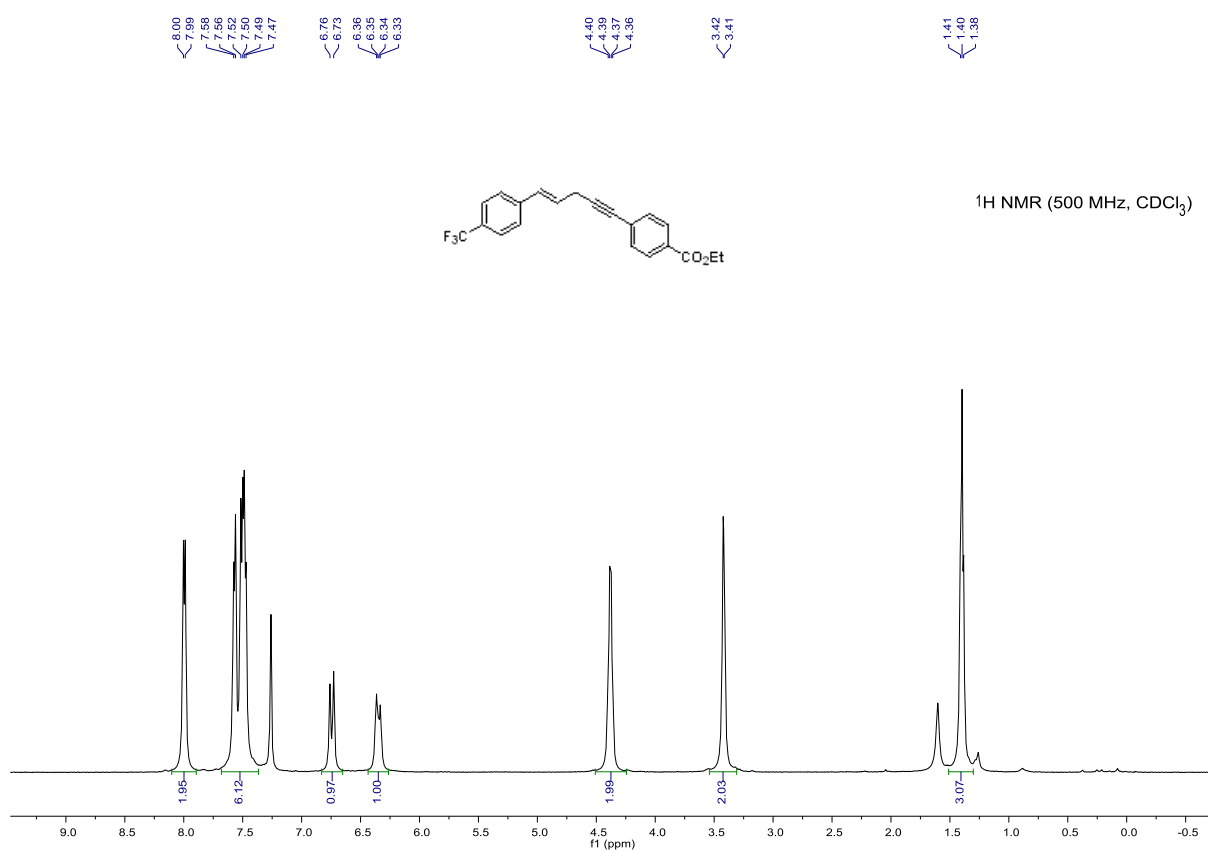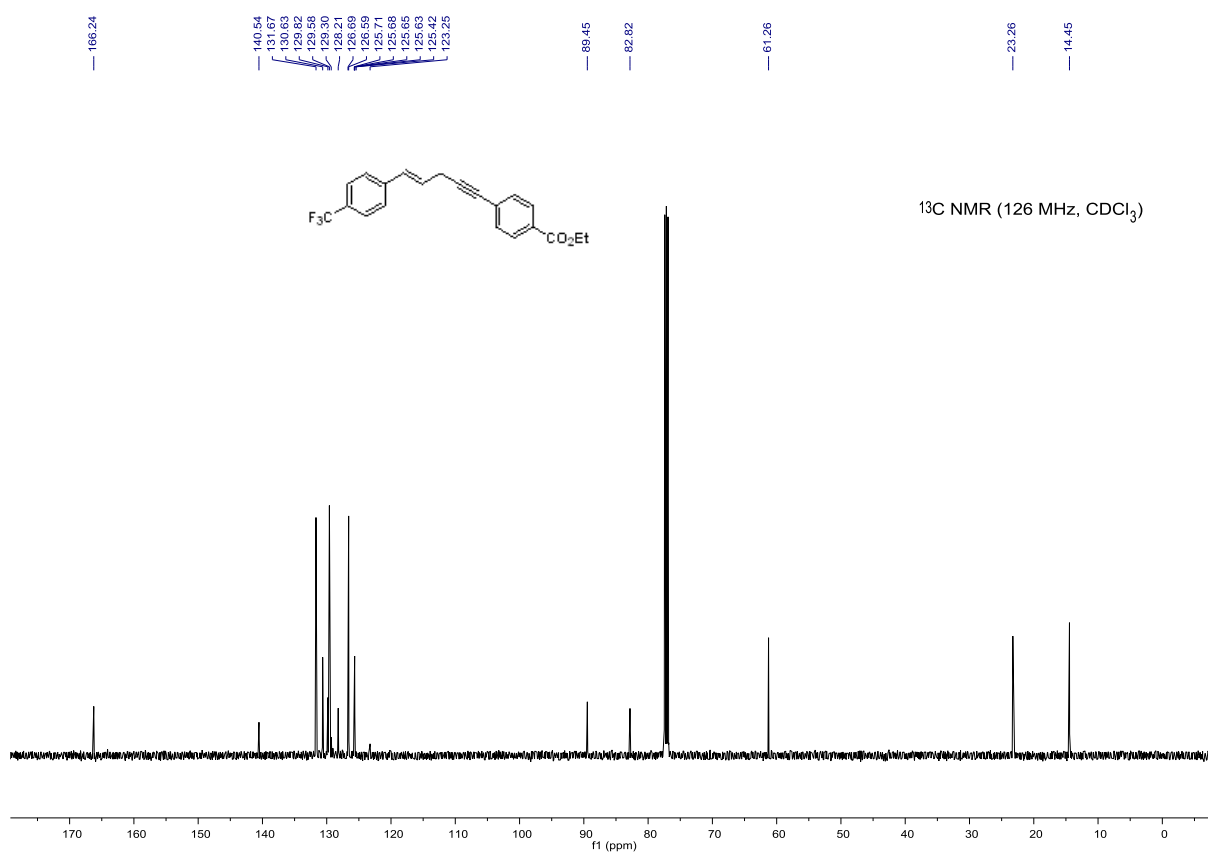

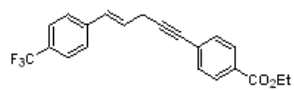

<sup>19</sup>F NMR (471 MHz, CDCl<sub>3</sub>)

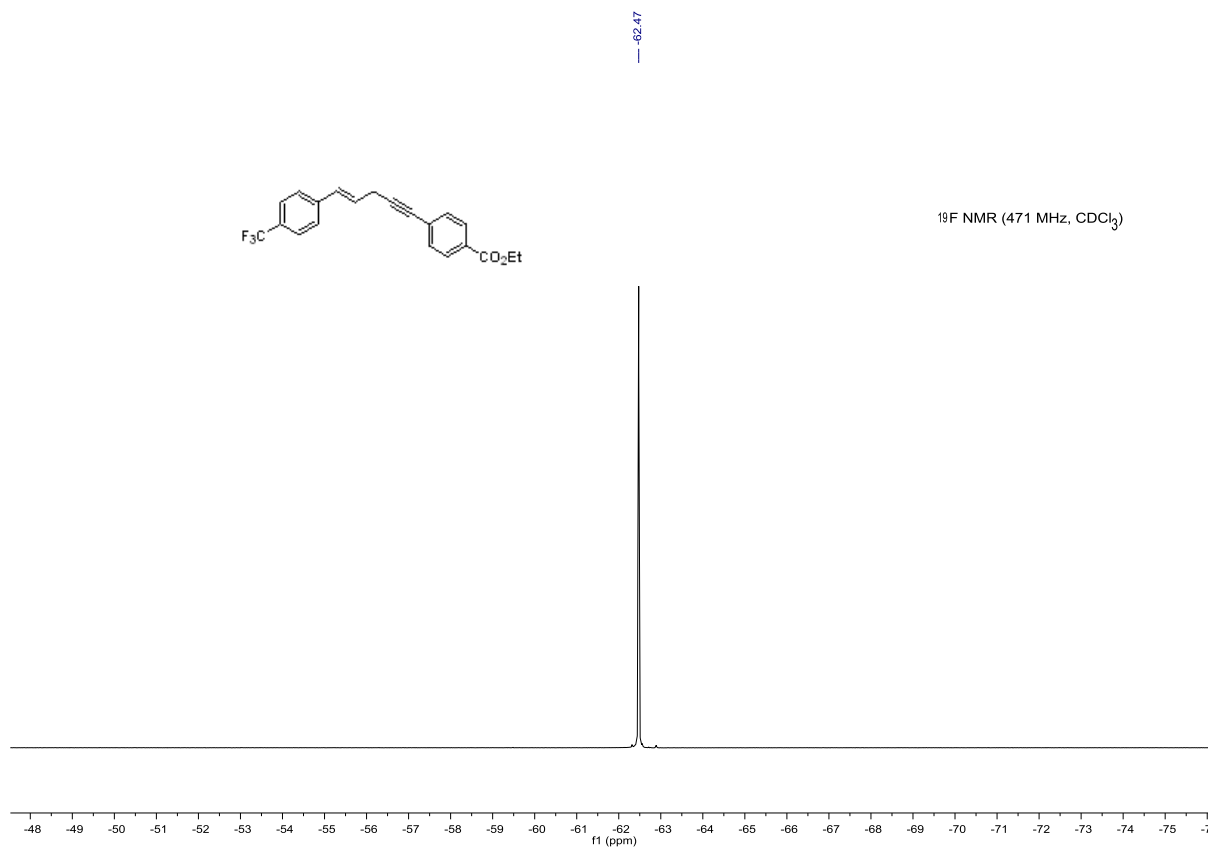

Supplement: d1cc05221g1.pdf [file d1cc05221g1.pdf]
